# Supplementary material
Source: publisher figshare collection journal article supplement (https://tandf.figshare.com/articles/dataset/_/3408856)
Supplement: Supplementary file 1 [file 1]

| Monoisotopic mass | Formula  | CAS number | Compound name                             |
|-------------------|----------|------------|-------------------------------------------|
| 53,02655          | C3H3N    | 107-13-1   | Acrylonitrile                             |
| 54,04695019       | C4H6     |            | butadiene                                 |
| 54,046951         | C4H6     | 106-99-0   | 1,3-Butadiene                             |
| 56,062599         | C4H8     | 115-11-7   | Isobutene                                 |
| 56,062599         | C4H8     | 106-98-9   | 1-Butene                                  |
| 56,06260026       | C4H8     |            | Irganox 1076 thermal degradation products |
| 57,05785          | C3H7N    | 75-55-8    | Aziridine, 2-methyl-                      |
| 58,005478         | C2H2O2   | 107-22-2   | Glyoxal                                   |
| 58,04186481       | C3H6O    | 123-38-6   | propionaldehyde                           |
| 58,041866         | C3H6O    | 67-64-1    | Acetone                                   |
| 58,041866         | C3H6O    | 107-25-5   | Methyl vinyl ether                        |
| 58,041866         | C3H6O    | 75-56-9    | Propylene oxyde                           |
| 58,078251         | C4H10    | 106-97-8   | Butane                                    |
| 58,078251         | C4H10    | 75-28-5    | Isobutane                                 |
| 59,03711379       | C2H5NO   |            | acetamide                                 |
| 59,07349929       | C3H9N    |            | isopropenylamine                          |
| 60,02113          | C2H4O2   | 64-19-7    | Acetic acid                               |
| 60,057514         | C3H8O    | 67-63-0    | 2-Propanol                                |
| 60,057514         | C3H8O    | 71-23-8    | 1-Propanol                                |
| 60,05751488       | C3H8O    |            | glycerol, glycerine                       |
| 60,068748         | C2H8N2   | 107-15-3   | Ethylenediamine                           |
| 60,068748         | C2H8N2   | 57-14-7    | Hydrazine, 1,1-dimethyl-                  |
| 61,052765         | C2H7NO   | 141-43-5   | 2-Aminoethanol                            |
| 61,992329         | C2H3Cl   | 75-01-4    | Vinyl Chloride                            |
| 62,036777         | C2H6O2   | 107-21-1   | Ethylene glycol                           |
| 62,03677944       | C2H6O2   |            | ethylene glycol                           |
| 68,062599         | C5H8     | 78-79-5    | 2-Methyl-1,3 -butadiene                   |
| 70,041862         | C4H6O    | 9003-19-4  | Polyvinyl ether                           |
| 71,037117         | C3H5NO   | 79-06-1    | Acrylamide                                |
| 71,037117         | C3H5NO   | 9003-05-8  | Polyacrylamide                            |
| 72,021126         | C3H4O2   | 79-10-7    | Acrylic acid                              |
| 72,057518         | C4H8O    | 106-88-7   | Butane, 1,2-epoxy-                        |
| 72,057518         | C4H8O    | 109-92-2   | Ethyl vinyl ether                         |
| 72,057518         | C4H8O    | 109-99-9   | Tetrahydrofuran                           |
| 72,057518         | C4H8O    | 78-93-3    | 2-Butanone                                |
| 72,057999         | C4H8O    | 123-72-8   | Butyraldehyde                             |
| 72,093903         | C5H12    | 109-66-0   | Pentane                                   |
| 72,093903         | C5H12    | 78-78-4    | Isopentane                                |
| 73,052765         | C3H7NO   | 68-12-2    | Dimethylformamide                         |
| 74,036781         | C3H6O2   | 646-06-0   | 1,3-Dioxolane                             |
| 74,036781         | C3H6O2   | 556-52-5   | 2,3-Epoxypropanol                         |
| 74,036781         | C3H6O2   | 79-09-4    | Propionic acid                            |
| 74,036781         | C3H6O2   | 79-20-9    | Acetic acid, methyl ester                 |
| 74,07316494       | C4H10O   |            | butanol                                   |
| 74,07316494       | C4H10O   |            | 2-methylpropan-1-ol                       |
| 74,073166         | C4H10O   | 75-65-0    | tert-Butanol                              |
| 74,073166         | C4H10O   | 78-83-1    | Isobutanol                                |
| 74,073166         | C4H10O   | 71-36-3    | 1-Butanol                                 |
| 74,073166         | C4H10O   | 78-92-2    | 2-Butanol                                 |
| 75,068413         | C3H9NO   | 109-83-1   | Ethanol, 2-(methylamino)-                 |
| 76,016045         | C2H4O3   | 79-14-1    | Glycolic acid                             |
| 76,016045         | C2H4O3   | 79-21-0    | Peroxyacetic acid                         |
| 76,052429         | C3H8O2   | 25322-69-4 | Polypropyleneglycol                       |
| 76,052429         | C3H8O2   | 504-63-2   | 1,3-Propanediol                           |
| 76,052429         | C3H8O2   | 57-55-6    | 1,2-Propanediol                           |
| 76,052429         | C3H8O2   | 63625-56-9 | Propylenglycol                            |
| 76,052429         | C3H8O2   | 109-86-4   | Ethylene glycol monomethyl ether          |
| 78,013931         | C2H6OS   | 67-68-5    | Dimethyl sulphoxide                       |
| 78,04695019       | C6H6     |            | benzene                                   |
| 78,04695019       | C6H6     |            | benzene                                   |
| 78,04695019       | C6H6     |            | benzene                                   |
| 78,046997         | C6H6     | 71-43-2    | Benzene                                   |
| 79,042198         | C5H5N    | 110-86-1   | Pyridine                                  |
| 80,06260026       | C6H8     |            | butadiene n=2                             |
| 82,07825032       | C6H10    |            | 2-methyl-2,4-pentadiene                   |
| 84,043594         | C2H4N4   | 461-58-5   | Dicyanodiamide                            |
| 84,05751488       | C5H8O    |            | cyclopentanone                            |
| 84,093903         | C6H12    | 110-82-7   | Cyclohexane                               |
| 84,093903         | C6H12    | 592-41-6   | 1-Hexene                                  |
| 84,093903         | C6H12    | 691-37-2   | 4-Methyl-1-pentene                        |
| 85,052765         | C4H7NO   | 110-67-8   | Propionitrile, 3-methoxy-                 |
| 85,052765         | C4H7NO   | 1187-59-3  | N-Methylacrylamide                        |
| 85,052765         | C4H7NO   | 79-39-0    | Methacrylamide                            |
| 86,036781         | C4H6O2   | 108-05-4   | Acetic acid, vinyl ester                  |
| 86,036781         | C4H6O2   | 3724-65-0  | Crotonic acid                             |
| 86,036781         | C4H6O2   | 79-41-4    | Methacrylic acid                          |
| 86,036781         | C4H6O2   | 9003-20-7  | Polyvinyl acetate                         |
| 86,036781         | C4H6O2   | 96-33-3    | Acrylic acid, methyl ester                |
| 86,036781         | C4H6O2   | 96-48-0    | γ-Butyrolactone                           |
| 86,07316494       | C5H10O   |            | cyclopentanone                            |
| 86,073166         | C5H10O   | 107-88-0   | 1,3-Butanediol                            |
| 86,084396         | C4H10N2  | 110-85-0   | Piperazine                                |
| 87,06841392       | C4H9NO   |            | butanamide                                |
| 88,052002         | C4H8O2   | 107-92-6   | Butyric acid                              |
| 88,052429         | C4H8O2   | 141-78-6   | Acetic acid, ethyl ester                  |
| 88,06366          | C3H8N2O  | 96-31-1    | Urea, 1,3-dimethyl-                       |
| 88,088814         | C5H12O   | 71-41-0    | 1-Pentanol                                |
| 89,047676         | C3H7NO2  | 4316-73-8  | Sarcosine, monosodium salt                |
| 89,084061         | C4H11NO  | 3710-84-7  | N,N-diethylhydroxylamine                  |
| 89,084061         | C4H11NO  | 108-01-0   | Dimethylaminoethanol                      |
| 89,084061         | C4H11NO  | 124-68-5   | 2-Amino-2-methylpropanol                  |
| 89,995003         | C2H2O4   | 144-62-7   | Oxalic acid                               |
| 90,031693         | C3H6O3   | 625-45-6   | Acetic acid, methoxy-                     |
| 90,031693         | C3H6O3   | 110-88-3   | Trioxane                                  |
| 90,031998         | C3H6O3   | 50-21-5    | Lactic acid                               |
| 90,042931         | C2H6N2O2 | 9011-05-6  | Urea-formaldehyde condensation products   |
| 90,068077         | C4H10O2  | 107-98-2   | 1-Methoxy-2-propanol                      |
| 90,068077         | C4H10O2  | 110-63-4   | 1,4-Butanediol                            |
| 90,068077         | C4H10O2  | 110-80-5   | Ethyleneglycol monoethyl ether            |
| 90,068077         | C4H10O2  | 2163-42-0  | 2-Methyl-1,3-propanediol                  |
| 90,068077         | C4H10O2  | 75-91-2    | tert-Butyl hydroperoxide                  |
| 91,99320006       | C2H4O2S  |            | mercaptoacetic acid                       |
| 92,002892         | C3H5ClO  | 106-89-8   | Epichlorohydrin                           |
| 92,00289249       | C3H5OCl  |            | epichlorohydrin                           |
| 92,04734          | C3H8O3   | 56-81-5    | Glycerol                                  |
| 92,04734412       | C3H8O3   |            | glycerol                                  |
| 92,04734412       | C3H8O3   |            | glycerol                                  |
| 92,062599         | C7H8     | 108-88-3   | Toluene                                   |
| 93,057846         | C6H7N    | 62-53-3    | Aniline                                   |
| 93,05784923       | C6H7N    |            | 2-methyl-pyridine                         |
| 93,05787426       | C6H7N    |            | Aniline                                   |
| 93,982155         | C2H3ClO2 | 79-11-8    | Monochloroacetic acid                     |
| 94,04186481       | C6H6O    |            | phenol                                    |
| 94,04186481       | C6H6O    |            | phenol                                    |
| 94,04186481       | C6H6O    |            | phenol                                    |
| 94,042            | C6H6O    | 108-95-2   | Phenol                                    |

|             |          |                     |                                                                                |
|-------------|----------|---------------------|--------------------------------------------------------------------------------|
| 94,053101   | C5H6N2   | 1072-63-5           | 1-Vinylimidazole                                                               |
| 94,07670203 | C7H8D    |                     | methylphenol                                                                   |
| 94,078247   | C7H10    | 498-66-8            | Bicyclo[2.2.1]hept-2-ene                                                       |
| 95,953354   | C2H2Cl2  | 75-35-4             | Vinylidene chloride                                                            |
| 96,021126   | C5H4O2   | 98-01-1             | 2-Furaldehyde                                                                  |
| 97,969009   | C2H4Cl2  | 107-06-2            | 1,2-Dichloroethane                                                             |
| 97,969009   | C2H4Cl2  | 1300-21-6           | Dichloroethane                                                                 |
| 98,000397   | C4H2O3   | 108-31-6            | Maleic anhydride                                                               |
| 99,068413   | C5H9NO   | 2680-03-7           | N,N-Dimethylacrylamide                                                         |
| 99,068413   | C5H9NO   | 872-50-4            | N-Methylpyrrolidinone                                                          |
| 99,068413   | C5H9NO   | 3195-78-6           | N-Vinyl-N-methylacetamide                                                      |
| 99,104797   | C6H13N   | 108-91-8            | Cyclohexylamine                                                                |
| 99,993614   | C2F4     | 9002-84-0           | Polytetrafluorethylene                                                         |
| 99,993614   | C2F4     | 116-14-3            | Tetrafluorethylene                                                             |
| 100,016044  | C4H4O3   |                     | cis-butanedioic anhydride                                                      |
| 100,016045  | C4H4O3   | 108-30-5            | Succinic anhydride                                                             |
| 100,052429  | C5H8O2   | 140-88-5            | Acrylic acid, ethyl ester                                                      |
| 100,052429  | C5H8O2   | 111-30-8            | Glutaraldehyde                                                                 |
| 100,052429  | C5H8O2   | 25035-84-1          | Polyvinyl propionate                                                           |
| 100,052429  | C5H8O2   | 80-62-6             | Methacrylic acid, methyl ester                                                 |
| 100,052429  | C5H8O2   | 9003-33-2           | Polyvinyl formal                                                               |
| 100,088814  | C6H12O   | 108-10-1            | Methyl isobutyl ketone                                                         |
| 100,088814  | C6H12O   | 109-53-5            | Isobutyl vinyl ether                                                           |
| 101,047676  | C4H7NO2  | 924-42-5            | N-Methylolacrylamide                                                           |
| 101,084064  | C5H11NO  |                     | pentanamide                                                                    |
| 101,120445  | C6H15N   | 121-44-8            | Triethylamine                                                                  |
| 102,031693  | C4H6O3   | 108-32-7            | Carbonic acid, cyclic propylene ester                                          |
| 102,031693  | C4H6O3   | 108-24-7            | Acetic anhydride                                                               |
| 102,0429274 | C3H6N2O2 |                     | acetyl urea                                                                    |
| 102,068077  | C5H10O2  | 108-21-4            | Acetic acid, isopropyl ester                                                   |
| 102,068077  | C5H10O2  | 109-52-4            | Valeric acid                                                                   |
| 102,068077  | C5H10O2  | 75-98-9             | Dimethylpropionic acid                                                         |
| 102,068077  | C5H10O2  | 109-60-4            | Acetic acid, propyl ester                                                      |
| 102,0680796 | C5H10O2  |                     | pentanoic acid                                                                 |
| 102,104462  | C6H14O   | 25917-35-5 111-27-3 | Hexanol                                                                        |
| 103,0421992 | C7H5N    |                     | benzonitrile                                                                   |
| 103,110947  | C4H13N3  | 111-40-0            | Diethylenetriamine                                                             |
| 104,011002  | C3H4O4   | 141-82-2            | Malonic acid                                                                   |
| 104,062599  | C8H8     | 100-42-5            | Styrene                                                                        |
| 104,0626003 | C8H8     |                     | styrene                                                                        |
| 104,083733  | C5H12O2  | 2807-30-9           | 2-(Propyloxy)ethanol                                                           |
| 104,083733  | C5H12O2  | 1569-02-4           | 1-Ethoxy-2-propanol                                                            |
| 104,083733  | C5H12O2  | 126-30-7            | 2,2-Dimethyl-1,3-propanediol                                                   |
| 104,094963  | C4H12N2O | 111-41-1            | N-(2-Aminoethyl)ethanolamine                                                   |
| 104,107002  | C5H14NO  | 123-41-1            | Choline and its salts                                                          |
| 105,057846  | C7H7N    | 100-43-6            | 4-Vinylpyridine                                                                |
| 105,078979  | C4H11NO2 | 111-42-2            | Diethanolamine                                                                 |
| 106,018539  | C4H7ClO  | 598-09-4            | 2-(Chloromethyl)-2-methyloxirane                                               |
| 106,0418648 | C7H6O    |                     | benzaldehyde                                                                   |
| 106,0418648 | C7H6O    |                     | benzaldehyde                                                                   |
| 106,042     | C7H6O    | 100-52-7            | Benzaldehyde                                                                   |
| 106,0629942 | C4H10O3  |                     | diethylene glycol                                                              |
| 106,062996  | C4H10O3  | 111-46-6            | Diethyleneglycol                                                               |
| 106,078247  | C8H10    | 100-41-4            | Ethylbenzene                                                                   |
| 106,078247  | C8H10    | 1330-20-7           | Xylene                                                                         |
| 106,0782503 | C8H10    |                     | 2,6-dimethylbenzene                                                            |
| 106,0782503 | C8H10    |                     | butadiene n=3                                                                  |
| 106,0782503 | C8H10    |                     | ethylbenzene                                                                   |
| 106,0782754 | C8H10    |                     | xylene                                                                         |
| 106,986336  | C2H5NS2  | 144-54-7            | Methyldithiocarbamic acid                                                      |
| 107,0734993 | C7H9N    |                     | benzenmethanamine, aminotoluene                                                |
| 107,0734993 | C7H9N    |                     | 2,6-dimethylpyridine                                                           |
| 107,073502  | C7H9N    | 95-53-4             | o-Toluidine                                                                    |
| 107,073502  | C7H9N    | 106-49-0            | p-Toluidine                                                                    |
| 107,0735243 | C7H9N    |                     | o-Toluidine                                                                    |
| 107,988113  | C2H4O3S  | 1184-84-5           | Vinylsulphonic acid                                                            |
| 107,988113  | C2H4O3S  | 3039-83-6           | Sodium vinylsulphonate                                                         |
| 108,021126  | C6H4O2   | 106-51-4            | Benzoquinone                                                                   |
| 108,0211294 | C6H4O2   |                     | benzoquinone                                                                   |
| 108,0211294 | C6H4O2   |                     | p-benzoquinone                                                                 |
| 108,034195  | C4H9ClO  | 36215-07-3          | Propane, 1-chloro-3-methoxy-                                                   |
| 108,0575149 | C7H8O    |                     | HydroxyPh                                                                      |
| 108,057518  | C7H8O    | 106-44-5            | p-Cresol                                                                       |
| 108,057518  | C7H8O    | 108-39-4            | m-Cresol                                                                       |
| 108,057518  | C7H8O    | 95-48-7             | o-Cresol                                                                       |
| 108,057518  | C7H8O    | 100-51-6            | Benzyl alcohol                                                                 |
| 108,068748  | C6H8N2   | 106-50-3            | p-Phenylenediamine                                                             |
| 108,0687483 | C6H8N2   |                     | p-phenylenediamine                                                             |
| 109,052765  | C6H7NO   | 123-30-8            | 4-Aminophenol                                                                  |
| 110,036781  | C6H6O2   | 108-46-3            | 1,3-Dihydroxybenzene                                                           |
| 110,036781  | C6H6O2   | 120-80-9            | 1,2-Dihydroxybenzene                                                           |
| 110,037003  | C6H6O2   | 123-31-9            | 1,4-Dihydroxybenzene                                                           |
| 110,084396  | C6H10N2  | 4078-19-7           | 1-Aziridinepropionitrile, .beta.-methyl-                                       |
| 111,068413  | C6H9NO   | 9003-39-8           | Polyvinylpyrrolidone                                                           |
| 111,068413  | C6H9NO   | 88-12-0             | Vinylpyrrolidone                                                               |
| 111,984657  | C3H6Cl2  | 78-87-5             | 1,2-Dichloropropane                                                            |
| 112,00798   | C6H5Cl   | 108-90-7            | Chlorobenzene                                                                  |
| 112,052429  | C6H8O2   | 999-55-3            | Acrylic acid, allyl ester                                                      |
| 112,052429  | C6H8O2   | 110-44-1            | Sorbic acid                                                                    |
| 112,0524545 | C6H8O2   |                     | m-Phenylenediamine                                                             |
| 112,088814  | C7H12O   | 1679-51-2           | 4-(Hydroxymethyl)-1- cyclohexene                                               |
| 112,125198  | C8H16    | 111-66-0            | 1-Octene                                                                       |
| 112,125198  | C8H16    | 25167-70-8          | Diisobutene                                                                    |
| 112,1252005 | C8H16    |                     | tert-octene                                                                    |
| 113,0476785 | C5H7NO2  |                     | glutarimide                                                                    |
| 113,084061  | C6H11NO  | 2210-25-5           | N-Isopropylacrylamide                                                          |
| 113,084061  | C6H11NO  | 105-60-2            | Caprolactam                                                                    |
| 113,084064  | C6H11NO  |                     | caprolactam                                                                    |
| 114,068077  | C6H10O2  | 106-92-3            | Allyl-2,3-epoxypropyl ether                                                    |
| 114,068077  | C6H10O2  | 24937-78-8          | Ethylene-vinyl acetate, copolymer                                              |
| 114,068077  | C6H10O2  | 4454-05-1           | 2H-Pyran, 3,4-dihydro-2-methoxy-                                               |
| 114,068077  | C6H10O2  | 689-12-3            | Acrylic acid, isopropyl ester                                                  |
| 114,068077  | C6H10O2  | 925-60-0            | Acrylic acid, propyl ester                                                     |
| 114,068077  | C6H10O2  | 97-63-2             | Methacrylic acid, ethyl ester                                                  |
| 114,1044651 | C7H14O   |                     | 2-ethyl-cyclopentanone                                                         |
| 114,1408506 | C8H18    |                     | octane                                                                         |
| 115,009186  | C4H5NOS  | 55965-84-9          | Mixture of 5-Chlor-2-methyl-2H-isothiazol-3-on and 2-Methyl-2H-isothiazol-3-on |
| 115,009186  | C4H5NOS  | 2682-20-4           | 2-Methyl-4-isothiazolin-3-one                                                  |
| 115,063332  | C5H9NO2  | 923-02-4            | N-Methylolmethacrylamide                                                       |
| 116,010956  | C4H4O4   | 110-16-7            | Maleic acid                                                                    |
| 116,010956  | C4H4O4   | 110-17-8            | Fumaric acid                                                                   |
| 116,0109586 | C4H4O4   |                     | maleic acid                                                                    |
| 116,0334504 | C2H4N4O2 |                     | Azodicarbonamide                                                               |
| 116,04734   | C5H8O3   | 818-61-1            | Acrylic acid, monoester with ethyleneglycol                                    |
| 116,04734   | C5H8O3   | 123-76-2            | Levulinic acid                                                                 |
| 116,062599  | C9H8     | 95-13-6             | Indene                                                                         |
| 116,083733  | C6H12O2  | 123-86-4            | Acetic acid, butyl ester                                                       |

|             |           |            |                                                                                        |
|-------------|-----------|------------|----------------------------------------------------------------------------------------|
| 116,083733  | C6H12O2   | 142-62-1   | Hexanoic acid                                                                          |
| 116,083733  | C6H12O2   | 3126-95-2  | Oxirane, (propoxymethyl)-                                                              |
| 116,083733  | C6H12O2   | 4016-14-2  | Propane, 1,2-epoxy-3-isopropoxy-                                                       |
| 116,083733  | C6H12O2   | 106-36-5   | propyl propanoate                                                                      |
| 116,083733  | C6H12O2   | 110-19-0   | Acetic acid, isobutyl ester                                                            |
| 116,1201151 | C7H16O    |            | 2,4-dimethylpentan-1-ol                                                                |
| 116,120117  | C7H16O    | 111-70-6   | 1-Heptanol                                                                             |
| 116,131348  | C6H16N2   | 124-09-4   | Hexamethylenediamine                                                                   |
| 116,131348  | C6H16N2   | 280-57-9   | Triethylenediamine                                                                     |
| 117,115364  | C6H15NO   | 100-37-8   | Diethylethanolamine                                                                    |
| 118,0266087 | C4H6O4    |            | butanedioic acid                                                                       |
| 118,026611  | C4H6O4    | 110-15-6   | Succinic acid                                                                          |
| 118,026611  | C4H6O4    | 110-22-5   | Diacetyl peroxide                                                                      |
| 118,053101  | C7H6N2    | 1885-29-6  | Anthranilonitrile                                                                      |
| 118,078247  | C9H10     | 98-83-9    | $\alpha$ -Methylstyrene                                                                |
| 118,0782503 | C9H10     |            | alpha-methylstyrene                                                                    |
| 118,09938   | C6H14O2   | 4457-71-0  | 3-Methylpentane-1,5-diol                                                               |
| 118,09938   | C6H14O2   | 107-41-5   | 2-Methyl-2,4-pentanediol                                                               |
| 118,09938   | C6H14O2   | 111-76-2   | Ethyleneglycol monobutyl ether                                                         |
| 118,09938   | C6H14O2   | 629-11-8   | 1,6-Hexanediol                                                                         |
| 119,048347  | C6H5N3    | 95-14-7    | 1H-Benzotriazole                                                                       |
| 119,0483472 | C6H5N3    |            | benzotriazole                                                                          |
| 119,0483472 | C6H5N3    |            | benzotriazole                                                                          |
| 120,05349   | C3H8N2O3  | 140-95-4   | N,N'-Bis(hydroxymethyl)urea                                                            |
| 120,0575149 | C8H8O     |            | acetophenone                                                                           |
| 120,0575149 | C8H8O     |            | acetophenone                                                                           |
| 120,0575399 | C8H8O     |            | Acetophenone                                                                           |
| 120,093903  | C9H12     | 16219-75-3 | 5-Ethylidenebicyclo [2.2.1]hept-2-ene                                                  |
| 120,093903  | C9H12     | 95-63-6    | 1,2,4-Trimethylbenzene                                                                 |
| 121,001991  | C3H7NS2   | 79-45-8    | Dimethyldithiocarbamic acid                                                            |
| 121,089149  | C8H11N    | 87-62-7    | 2,6-Xylidine                                                                           |
| 121,089149  | C8H11N    | 103-69-5   | Aniline, N-ethyl-                                                                      |
| 121,089149  | C8H11N    | 618-36-0   | Benzylamine, $\alpha$ .-methyl-, (+-)-                                                 |
| 121,0891494 | C8H11N    |            | 2,4-dimethylaniline                                                                    |
| 121,0891494 | C8H11N    |            | 2,6-dimethylaniline                                                                    |
| 121,0891494 | C8H11N    |            | 2,4,6-trimethyl-pyridine                                                               |
| 121,0891494 | C8H11N    |            | 3-(1-methylethyl)-pyridine                                                             |
| 121,0891744 | C8H11N    |            | 2,6-Dimethylaniline                                                                    |
| 122,0367794 | C7H6O2    |            | benzoic acid                                                                           |
| 122,036781  | C7H6O2    | 65-85-0    | Benzoic acid                                                                           |
| 122,057907  | C4H10O4   | 3586-55-8  | Ethylene glycol bis(hydroxymethyl ether)                                               |
| 122,0731649 | C8H10O    |            | 1-phenylethanol                                                                        |
| 122,073166  | C8H10O    | 104-93-8   | Anisole, p-methyl-                                                                     |
| 122,073166  | C8H10O    | 123-07-9   | Phenol, p-ethyl-                                                                       |
| 122,073166  | C8H10O    | 576-26-1   | 2,6-Dimethylphenol                                                                     |
| 122,073166  | C8H10O    | 95-65-8    | 3,4-xlenol                                                                             |
| 122,073166  | C8H10O    | 95-87-4    | 2,5-Dimethylphenol                                                                     |
| 122,073166  | C8H10O    | 105-67-9   | 2,4-Dimethylphenol                                                                     |
| 122,073166  | C8H10O    | 108-68-9   | 3,5-dimethylphenol                                                                     |
| 122,0844234 | C7H10N2   |            | Toluene-2,6-diamine                                                                    |
| 122,0844234 | C7H10N2   |            | Toluene-2,4-diamine                                                                    |
| 122,1095504 | C9H14     |            | trans-2,6-dimethyl-2,4,6-heptatriene                                                   |
| 123,0684139 | C7H9NO    |            | o-anisidine                                                                            |
| 124,052429  | C7H8O2    | 150-76-5   | 4-Methoxyphenol                                                                        |
| 125,99868   | C2H6O4S   | 77-78-1    | Sulfuric acid, dimethyl ester                                                          |
| 126,023628  | C7H7Cl    | 100-44-7   | Toluene, .alpha.-chloro-                                                               |
| 126,065392  | C3H6N6    | 108-78-1   | 2,4,6-Triamino-1,3,5-triazine                                                          |
| 126,0653942 | C3H6N6    |            | melamine                                                                               |
| 126,068077  | C7H10O2   | 96-05-9    | Methacrylic acid, allyl ester                                                          |
| 126,1408506 | C9H18     |            | nonene                                                                                 |
| 127,0188769 | C6H6NCl   |            | 4-chloroaniline                                                                        |
| 127,0494098 | C3H5N5O   |            | ammeline                                                                               |
| 127,0633285 | C6H9NO2   |            | azepane-2,7-dione                                                                      |
| 128,0334254 | C3H4N4O2  |            | ammelide                                                                               |
| 128,0374481 | C8H4N2    |            | phthalodinitrile                                                                       |
| 128,047348  | C6H8O3    | 106-90-1   | Acrylic acid, 2,3-epoxypropyl ester                                                    |
| 128,058578  | C5H8N2O2  | 77-71-4    | 5,5-Dimethylhydantoin                                                                  |
| 128,062607  | C10H8     | 91-20-3    | Naphthalene                                                                            |
| 128,0626253 | C10H8     |            | naphthalene                                                                            |
| 128,083725  | C7H12O2   | 106-63-8   | Acrylic acid, isobutyl ester                                                           |
| 128,083725  | C7H12O2   | 141-32-2   | Acrylic acid, n-butyl ester                                                            |
| 128,083725  | C7H12O2   | 1663-39-4  | Acrylic acid, tert-butyl ester                                                         |
| 128,083725  | C7H12O2   | 2210-28-8  | Methacrylic acid, propyl ester                                                         |
| 128,083725  | C7H12O2   | 2998-08-5  | Acrylic acid, sec-butyl ester                                                          |
| 128,1565006 | C9H20     |            | nonane                                                                                 |
| 128,968277  | C2H4NNaS2 | 137-42-8   | Methyldithiocarbamic acid, sodium salt                                                 |
| 129,017441  | C3H3N3O3  |            | cyruanic acid                                                                          |
| 129,078979  | C6H11NO2  | 1696-20-4  | Morpholine, 4-acetyl-                                                                  |
| 129,078979  | C6H11NO2  | 7659-36-1  | Methacrylic acid, 2-aminoethyl ester                                                   |
| 129,09021   | C5H11N3O  | 6281-42-1  | N-(2-Aminoethyl)ethyleneurea                                                           |
| 129,1279402 | C8H17O    |            | 2-ethylhexyl aldehyde                                                                  |
| 129,957901  | C2H2CaO4  | 544-17-2   | Calcium diformate                                                                      |
| 129,965942  | C3H2N2S2  | 6317-18-6  | Methylenebisthiocyanate                                                                |
| 130,026611  | C5H6O4    | 97-65-4    | Itaconic acid                                                                          |
| 130,062988  | C6H10O3   | 123-62-6   | Propionic anhydride                                                                    |
| 130,062988  | C6H10O3   | 25584-83-2 | Acrylic acid, monoester with 1,2-propanediol                                           |
| 130,062988  | C6H10O3   | 2238-07-5  | Ether, bis(2,3-epoxypropyl)                                                            |
| 130,062988  | C6H10O3   | 2918-23-2  | Acrylic acid, 2-hydroxyisopropyl ester (= acrylic acid, 2-hydroxy-1-methylethyl ester) |
| 130,062988  | C6H10O3   | 3121-61-7  | Acrylic acid, 2-methoxyethyl ester                                                     |
| 130,062988  | C6H10O3   | 332-77-4   | Furan, 2,5-dihydro-2,5-dimethoxy-                                                      |
| 130,062988  | C6H10O3   | 999-61-1   | Acrylic acid, 2-hydroxypropyl ester                                                    |
| 130,074234  | C5H10N2O2 | 3699-54-5  | 2-Imidazolidinone, 1-(2-hydroxyethyl)-                                                 |
| 130,078247  | C10H10    | 1321-74-0  | Divinylbenzene                                                                         |
| 130,078247  | C10H10    | 29036-25-7 | 1H-Indene, methyl-                                                                     |
| 130,09938   | C7H14O2   | 2426-08-6  | Bis(2,3-epoxypropyl) butyl ether                                                       |
| 130,09938   | C7H14O2   | 590-01-2   | butyl propanoate                                                                       |
| 130,09938   | C7H14O2   | 111-14-8   | Heptanoic acid                                                                         |
| 130,09938   | C7H14O2   | 7665-72-7  | Oxirane, [(1,1-dimethylethoxy)methyl]-                                                 |
| 130,135757  | C8H18O    | 104-76-7   | 2-Ethyl-1-hexanol                                                                      |
| 130,1357652 | C8H18O    |            | 2-ethylhexanol                                                                         |
| 130,1357652 | C8H18O    |            | 2-ethylhexanol                                                                         |
| 130,1357652 | C8H18O    |            | octanol                                                                                |
| 130,136002  | C8H18O    | 111-87-5   | 1-Octanol                                                                              |
| 130,136002  | C8H18O    | 123-96-6   | Octan-2-ol                                                                             |
| 132,042007  | C5H8O4    | 110-94-1   | Glutaric acid                                                                          |
| 132,078644  | C6H12O3   | 108-65-6   | Acetic acid, 2-methoxyisopropyl ester                                                  |
| 132,078644  | C6H12O3   | 63697-00-7 | Lactic acid, isopropyl ester                                                           |
| 132,078644  | C6H12O3   | 70657-70-4 | 1-Propanol, 2-methoxy-, acetate                                                        |
| 132,078995  | C6H12O3   | 107-71-1   | tert-Butylperoxy acetate                                                               |
| 132,0939004 | C10H12    |            | butadiene n=4                                                                          |
| 132,093903  | C10H12    | 77-73-6    | Dicyclopentadiene                                                                      |
| 132,115036  | C7H16O2   | 5131-66-8  | 1-Butoxy-2-propanol                                                                    |
| 132,115036  | C7H16O2   | 29387-86-8 | Propyleneglycol monobutyl ether                                                        |
| 133,063995  | C7H7N3    | 29878-31-7 | 1H-Benzotriazole, 4-methyl-                                                            |
| 134,02153   | C4H6O5    | 617-48-1   | Malic acid                                                                             |
| 134,036774  | C8H6O2    | 553-86-6   | 2(3H)-Benzofuranone                                                                    |
| 134,057907  | C5H10O4   | 4767-03-7  | 2,2-Bis(hydroxymethyl)propionic acid                                                   |

|             |           |                 |                                                   |
|-------------|-----------|-----------------|---------------------------------------------------|
| 134,0731649 | C9H10O    |                 | 3,4-dimethylbenzaldehyde                          |
| 134,094299  | C6H14O3   | 111-90-0        | Diethyleneglycol monoethyl ether                  |
| 134,094299  | C6H14O3   | 25265-71-8      | Dipropyleneglycol                                 |
| 134,094299  | C6H14O3   | 110-98-5        | 1,1'-Oxydipropan-2-ol                             |
| 134,094299  | C6H14O3   | 77-99-6         | 1,1,1-Trimethylolpropane                          |
| 134,1095504 | C10H14    |                 | tert-butyl-benzene                                |
| 135,06842   | C8H9NO    | 99-92-3         | Acetophenone, 4'-amino-                           |
| 135,1047994 | C9H13N    |                 | 2-butyl-pyridine                                  |
| 135,1047994 | C9H13N    |                 | 2,4,5-trimethylaniline                            |
| 136,052429  | C8H8O2    | 93-58-3         | Benzoic acid, methyl ester                        |
| 136,052429  | C8H8O2    | 123-11-5        | p-Anisaldehyde                                    |
| 136,06366   | C7H8N2O   | 88-68-6         | 2-Aminobenzamide                                  |
| 136,073563  | C5H12O4   | 115-77-5        | Pentaerythritol                                   |
| 136,088821  | C9H12O    | 26998-80-1      | 2,3,4-Trimethylphenol                             |
| 136,1000484 | C8H12N2   |                 | 1,3-benzenedimethanamine, m-xylylenediamine       |
| 136,100052  | C8H12N2   | 1477-55-0       | 1,3-Benzenedimethanamine                          |
| 136,100052  | C8H12N2   | 539-48-0        | 1,4-Benzenedimethanamine                          |
| 136,125198  | C10H16    | 127-91-3        | β -Pinene                                         |
| 136,125198  | C10H16    | 138-86-3        | Limonene                                          |
| 136,125198  | C10H16    | 586-62-9        | Terpinolene                                       |
| 136,125198  | C10H16    | 80-56-8         | α -Pinene                                         |
| 137,047684  | C7H7NO2   | 88-72-2         | Toluene, o-nitro-                                 |
| 137,047684  | C7H7NO2   | 99-99-0         | Toluene, p-nitro-                                 |
| 137,084064  | C8H11NO   |                 | 2-ethoxyaniline                                   |
| 137,084064  | C8H11NO   |                 | 2-methoxy-5-methylaniline                         |
| 138,031693  | C7H6O3    | 69-72-7         | Salicylic acid                                    |
| 138,031693  | C7H6O3    | 99-96-7         | p-Hydroxybenzoic acid                             |
| 138,068085  | C8H10O2   | 14548-60-8      | (Benzyloxy)methanol                               |
| 138,079313  | C7H10N2O  |                 | 4-methoxy-m-phenylenediamine                      |
| 138,079315  | C7H10N2O  | 13811-50-2      | N,N'-Divinyl-2-imidazolidinone                    |
| 138,104462  | C9H14O    | 78-59-1         | Isophorone                                        |
| 139,030319  | C3H9NO3S  | 107-68-6        | Taurine, N-methyl-                                |
| 139,1360996 | C9H17N    |                 | aza-2,2,6,6-tetramethyl-3-cyclohexene             |
| 139,1360996 | C9H17N    |                 | 2,7,7-trimethyl-5-cycloheptene                    |
| 139,1360996 | C9H17N    |                 | aza-2,2,6,6-tetramethyl-3-cyclohexene             |
| 140,083725  | C8H12O2   | 106-87-6        | 7-Oxabicyclo[4,1,0]heptane, 3-(2-oxiranyl)-       |
| 140,106201  | C6H12N4   | 100-97-0        | Hexamethylenetetramine                            |
| 140,1201151 | C9H16O    |                 | 2-butyl-cyclopentanone                            |
| 140,156494  | C10H20    | 872-05-9        | 1-Decene                                          |
| 141,034527  | C7H8NCI   |                 | 4-chloro-o-toluidine                              |
| 141,0789786 | C7H11NO2  |                 | 1-propyl-2,5-pyrrolidine-dione                    |
| 141,078979  | C7H11NO2  | 5117-12-4       | 4-Acryloylmorpholine                              |
| 141,958832  | C3H4Cl2O2 | 627-11-2        | Formic acid, chloro-, 2-chloroethyl ester         |
| 141,995224  | C4H8Cl2O  | 111-44-4        | Ether, bis(2-chloroethyl)                         |
| 142,0185676 | C7H7OCl   |                 | Chloroanisole                                     |
| 142,018997  | C7H7ClO   | 59-50-7         | p-Chloro-m-cresol                                 |
| 142,062988  | C7H10O3   | 106-91-2        | Glycidyl methacrylate                             |
| 142,09938   | C8H14O2   | 585-07-9        | Methacrylic acid, tert-butyl ester                |
| 142,09938   | C8H14O2   | 97-88-1         | Methacrylic acid, butyl ester                     |
| 142,09938   | C8H14O2   | 97-86-9         | Methacrylic acid, isobutyl ester                  |
| 142,135757  | C9H18O    | 108-83-8        | Diisobutyl ketone                                 |
| 142,1357652 | C9H18O    |                 | nonanal                                           |
| 142,983932  | C3H6NNaS2 | 128-04-1        | Sodium dimethyldithiocarbamate                    |
| 143,058243  | C6H9NO3   | 9003-06-9       | Acrylamide-acrylic acid, copolymer                |
| 143,0735243 | C10H9N    |                 | 2-Naphthylamine                                   |
| 143,094635  | C7H13NO2  | 2439-35-2       | Acrylic acid, 2-(dimethylamino)ethyl ester        |
| 144,042252  | C6H8O4    | 24615-84-7      | Hydracrylic acid, acrylate                        |
| 144,0422587 | C6H8O4    |                 | maleic acid ethyl ester                           |
| 144,05751   | C10H8O    | 135-19-3        | 2-Naphthol                                        |
| 144,078644  | C7H12O3   | 106-74-1        | Acrylic acid, 2-ethoxyethyl ester                 |
| 144,078644  | C7H12O3   | 2478-10-6       | Acrylic acid, monoester with 1,4-butanediol       |
| 144,115005  | C8H16O2   | 124-07-2        | Caprylic acid                                     |
| 144,1150298 | C8H16O2   |                 | 2-ethylhexanoic acid                              |
| 144,115036  | C8H16O2   | 105-08-8        | 1,4-Bis(hydroxymethyl)cyclohexane                 |
| 144,115036  | C8H16O2   | 149-57-5        | Ethyl hexanoic acid                               |
| 144,115036  | C8H16O2   | 624-54-4        | pentyl propanoate                                 |
| 144,115036  | C8H16O2   | 97-85-8         | Isobutyric acid, isobutyl ester                   |
| 144,151413  | C9H20O    | 143-08-8        | 1-Nonanol                                         |
| 144,162643  | C8H20N2   | 121-05-1        | Ethylenediamine, N,N-diisopropyl-                 |
| 146,036774  | C9H6O2    | 91-64-5         | Coumarin                                          |
| 146,057907  | C6H10O4   | 3248-28-0       | Dipropionyl peroxide                              |
| 146,057907  | C6H10O4   | 95-92-1         | Diethyl oxalate                                   |
| 146,0579088 | C6H10O4   |                 | hexanedioic acid, adipic acid                     |
| 146,057999  | C6H10O4   | 111-55-7        | Acetic acid, diester with ethyleneglycol          |
| 146,057999  | C6H10O4   | 124-04-9        | Adipic acid                                       |
| 146,073166  | C10H10O   | 61788-44-1      | 2,4-divinylphenol                                 |
| 146,094299  | C7H14O3   | 138-22-7        | Lactic acid, butyl ester                          |
| 146,094299  | C7H14O3   | 4435-53-4       | 3-Methoxybutyl acetate                            |
| 146,094299  | C7H14O3   | 54839-24-6      | Acetic acid, ethoxysisopropyl ester               |
| 146,130676  | C8H18O2   | 110-05-4        | Di-tert-butyl peroxide                            |
| 146,130676  | C8H18O2   | 353260-22-7     | 2,4,4-Trimethylpentyl-2-hydroperoxide             |
| 146,153     | C6H18N4   | 112-24-3        | Triethylenetetramine                              |
| 147,032028  | C8H5NO2   | 85-41-6         | Phthalimide                                       |
| 148,016037  | C8H4O3    | 85-44-9         | Phthalic anhydride                                |
| 148,029114  | C6H9ClO2  | 9003-22-9       | Vinyl acetate - vinyl chloride, copolymer         |
| 148,0524295 | C9H8O2    |                 | vinyl benzoate                                    |
| 148,055573  | C5H12O3Si | 2768-02-7       | Vinyltrimethoxysilane                             |
| 148,073563  | C6H12O4   | 868-77-9        | Methacrylic acid, monoester with ethyleneglycol   |
| 148,084793  | C5H12N2O3 | 141-07-1        | 1,3-Bis(methoxymethyl)urea                        |
| 148,101883  | C8H17Cl   | 111-85-3        | Octane, 1-chloro-                                 |
| 148,10994   | C7H16O3   | 20324-32-7      | 1-(2-Methoxy-1-methylethoxy)-2-propanol           |
| 148,10994   | C7H16O3   | 34590-94-8      | Dipropyleneglycol monomethyl ether                |
| 148,970215  | C4H4ClNOS | 26172-55-4      | 5-Chloro-2-methyl-4-isothiazoline-3-one           |
| 148,970215  | C4H4ClNOS | 26172-55-4      | 3(2H)-Isothiazolone, 5-chloro-2-methyl-           |
| 149,009155  | C4H5O6    | 96-49-1         | Ethylene carbonate                                |
| 149,033295  | C5H11NS2  | 20624-25-3      | Sodium ethylene bis dithiocarbamate               |
| 149,105194  | C6H15NO3  | 102-71-6        | Triethanolamine                                   |
| 150,016434  | C4H6O6    | 87-69-4#33-37-9 | Tartaric acid                                     |
| 150,016434  | C4H6O6    | 87-69-4         | L-Tartaric acid                                   |
| 150,068085  | C9H10O2   | 122-60-1        | 2,3-Epoxypropyl phenyl ether                      |
| 150,068085  | C9H10O2   | 140-11-4        | Acetic acid, benzyl ester                         |
| 150,068085  | C9H10O2   | 140-11-4        | Benzyl acetate                                    |
| 150,068085  | C9H10O2   | 937-41-7        | Acrylic acid, phenyl ester                        |
| 150,068085  | C9H10O2   | 93-89-0         | Benzoic acid, ethyl ester                         |
| 150,089203  | C6H14O4   | 109-16-0        | Methacrylic acid, diester with triethylene glycol |
| 150,089203  | C6H14O4   | 112-27-6        | Triethylene glycol                                |
| 150,104462  | C10H14O   | 585-34-2        | 3-Tert-butylphenol                                |
| 150,104462  | C10H14O   | 89-72-5         | 2-sec-Butylphenol                                 |
| 150,104462  | C10H14O   | 98-54-4         | 4-tert-Butylphenol                                |
| 150,104462  | C10H14O   | 99-71-8         | 4-sec-Butylphenol                                 |
| 150,1044651 | C10H14O   |                 | tert-butyl-phenol                                 |
| 151,009186  | C7H5NOS   | 2634-33-5       | 1,2-Benzisothiazolin-3-one                        |
| 151,063324  | C8H9NO2   | 103-90-2        | N-(4-Hydroxyphenyl) acetamide                     |
| 151,076385  | C6H14ClNO | 3033-77-0       | (2,3-Epoxypropyl)trimethylammonium chloride       |
| 152,047348  | C8H8O3    | 100-09-4        | p-Anisic acid                                     |
| 152,047348  | C8H8O3    | 119-36-8        | Salicylic acid, methyl ester                      |
| 152,047348  | C8H8O3    | 121-33-5        | Vanillin                                          |

|             |             |            |                                                                   |
|-------------|-------------|------------|-------------------------------------------------------------------|
| 152,047348  | C8H8O3      | 156-38-7   | Acetic acid, (p-hydroxyphenyl)-                                   |
| 152,047348  | C8H8O3      | 99-76-3    | 4-Hydroxybenzoic acid, methyl ester                               |
| 152,083725  | C9H12O2     | 37281-57-5 | Poly(oxy-1,2-ethanediyl), .alpha.-(methylphenyl)-.omega.-hydroxy- |
| 152,083725  | C9H12O2     | 4169-04-4  | 1-Propanol, 2-phenoxy-                                            |
| 152,083725  | C9H12O2     | 80-15-9    | $\alpha$ , $\alpha$ -Dimethylbenzyl hydroperoxide                 |
| 152,1201151 | C10H16O     |            | 2-cyclopentyl-cyclo-pentanone                                     |
| 152,1201151 | C10H16O     |            | 2-cyclopentylcyclopentanone                                       |
| 152,120117  | C10H16O     | 76-22-2    | Camphor                                                           |
| 153,1517496 | C10H19N     |            | aza-1,2,2,6,6-pentamethyl-3-cyclohexene                           |
| 153,995224  | C5H8Cl2O    | 1575-61-7  | Pentanoyl chloride, 5-chloro-                                     |
| 154,031601  | C6H12Cl2    | 2163-00-0  | Hexane, 1,6-dichloro-                                             |
| 154,062988  | C8H10O3     | 760-93-0   | Methacrylic anhydride                                             |
| 154,071823  | C5H11N2NaO2 | 84434-12-8 | N-(2-Aminoethyl)-beta-alanine, sodium salt                        |
| 154,074234  | C7H10N2O2   | 110-26-9   | Methylenebisacrylamide                                            |
| 154,078247  | C12H10      | 92-52-4    | Biphenyl                                                          |
| 154,0782503 | C12H10      |            | 1,1-biphenyl                                                      |
| 154,1357652 | C10H18O     |            | 2-pentyl-cyclopentanone                                           |
| 155,045944  | C7H6N3Na    | 64665-57-2 | 1H-Benzotriazole, 4(or 5)-methyl-, sodium salt                    |
| 155,069473  | C6H9N3O2    | 6642-31-5  | 6-Amino-1,3-dimethyluracil                                        |
| 155,0946287 | C8H13NO2    |            | 1-butyl-2,5-pyrrolidine-dione                                     |
| 155,0946287 | C8H13NO2    |            | 2-butyl-3,5-pyrrolidine-dione                                     |
| 155,1310142 | C9H17NO     |            | 2,2,6,6-tetramethyl-4-piperidinone                                |
| 156,034195  | C8H9ClO     | 88-04-0    | 4-Chloro-3,5-dimethylphenol                                       |
| 156,078644  | C8H12O3     | 2399-48-6  | Acrylic acid, tetrahydrofurfuryl ester                            |
| 156,115036  | C9H16O2     | 2499-95-8  | Acrylic acid, hexyl ester                                         |
| 156,1626487 | C9H20N2     |            | 2,2,6,6-tetramethyl-4-aminopiperidine                             |
| 157,110275  | C8H15NO2    | 2867-47-2  | Methacrylic acid, 2-(dimethylamino)ethyl ester                    |
| 157,1466642 | C9H19NO     |            | 2,2,6,6-tetramethyl-4-piperidinol                                 |
| 157,1466642 | C9H19NO     |            | 4-hydroxy-2,2,6,6-tetramethylpiperidine                           |
| 158,001358  | C4H7NaO3S   | 1561-92-8  | Methallylsulphonic acid, sodium salt                              |
| 158,0843983 | C10H10N2    |            | 1,5-diaminonaphthalene                                            |
| 158,094299  | C8H14O3     | 106-31-0   | Butyric anhydride                                                 |
| 158,1095504 | C12H14      |            | butadiene n=5                                                     |
| 158,130676  | C9H18O2     | 112-05-0   | Nonanoic acid                                                     |
| 158,167068  | C10H22O     | 112-30-1   | 1-Decanol                                                         |
| 158,167068  | C10H22O     | 78-69-3    | Tetrahydro linalool                                               |
| 158,95787   | C3H6KNS2    | 128-03-0   | Potassium dimethylcarbamodithioate                                |
| 160,073563  | C7H12O4     | 13533-05-6 | Acrylic acid, monoester with diethyleneglycol                     |
| 160,0735839 | C7H12O4     |            | Monomethyl adipate                                                |
| 160,10994   | C8H16O3     | 112-07-2   | Acetic acid, 2-butoxyethyl ester                                  |
| 160,110001  | C8H16O3     | 109-13-7   | tert-Butylperoxy isobutyrate                                      |
| 161,012253  | C3H8NNaO3S  | 4316-74-9  | Ethanesulfonic acid, 2-(methylamino)-, monosodium salt            |
| 161,047684  | C9H7NO2     | 550-44-7   | Phthalimide, N-methyl-                                            |
| 161,097122  | C8H16ClN    | 26062-79-3 | Polydimethyldiallyl ammonium chloride                             |
| 161,097122  | C8H16ClN    | 7398-69-8  | Diallyldimethyl ammonium chloride                                 |
| 161,105606  | C6H19NSi2   | 999-97-3   | Hexamethyldisilazane                                              |
| 161,929825  | C2N2Na2S2   | 138-93-2   | Cyanodithiocarbamic acid, disodium salt                           |
| 161,974503  | C3H3AlO6    | 7360-53-4  | Aluminium triformate                                              |
| 161,974503  | C3H3AlO6    | 7360-53-4  | Aluminium triformate                                              |
| 162,011002  | C4H7AlO5    | 139-12-8   | Hydroxyaluminium di(acetate)                                      |
| 162,028534  | C5H10N2S2   | 533-74-4   | 3,5-Dimethyl-1,3,5,2h-tetrahydrothiadiazine-2-thione              |
| 162,044754  | C7H11ClO2   | 13248-54-9 | Formic acid, chloro-, cyclohexyl ester                            |
| 162,068085  | C10H10O2    | 2177-70-0  | Methacrylic acid, phenyl ester                                    |
| 162,068085  | C10H10O2    | 2495-35-4  | Acrylic acid, benzyl ester                                        |
| 162,089615  | C6H18OSi2   | 107-46-0   | Hexamethyldisiloxane                                              |
| 162,125595  | C8H18O3     | 112-34-5   | Diethyleneglycol butyl ether                                      |
| 162,1408506 | C12H18      |            | di-isopropyl-benzene                                              |
| 163,875412  | C2Cl4       | 127-18-4   | Tetrachloroethylene                                               |
| 164,000488  | C7H6ClNaO   | 15733-22-9 | p-Chloro-m-cresol, sodium salt                                    |
| 164,068466  | C6H12O5     | 12441-09-7 | Sorbitan                                                          |
| 164,083725  | C10H12O2    | 2210-79-9  | 2,3-Epoxypropyl-o-tolyl ether                                     |
| 164,083725  | C10H12O2    | 97-54-1    | Phenol, 2-methoxy-4-propenyl-                                     |
| 164,083725  | C10H12O2    | 97-54-1    | trans-isoeugenol                                                  |
| 164,083725  | C10H12O2    | 2315-68-6  | Benzoic acid, propyl ester                                        |
| 164,083725  | C10H12O2    | 97-53-0    | Eugenol                                                           |
| 164,094955  | C9H12N2O    | 101-42-8   | N,N-Dimethyl-N'-phenylurea                                        |
| 164,106201  | C8H12N4     | 78-67-1    | Azobis(isobutyronitrile)                                          |
| 164,1201151 | C11H16O     |            | 2-tert-butyl-6-methyl-phenol                                      |
| 164,120117  | C11H16O     | 2409-55-4  | 2-tert-butyl-4-methylphenol                                       |
| 164,120117  | C11H16O     | 80-46-6    | p-tert-Amylphenol                                                 |
| 165,115356  | C10H15NO    | 92-50-2    | Ethanol, 2-(N-ethylanilino)-                                      |
| 166,0266087 | C8H6O4      |            | phthalic acid                                                     |
| 166,0266087 | C8H6O4      |            | phthalic acid                                                     |
| 166,0266087 | C8H6O4      |            | terephthalic acid                                                 |
| 166,026611  | C8H6O4      | 100-21-0   | Terephthalic acid                                                 |
| 166,026611  | C8H6O4      | 121-91-5   | Isophthalic acid                                                  |
| 166,026611  | C8H6O4      | 88-99-3    | o-Phthalic acid                                                   |
| 166,062988  | C9H10O3     | 120-47-8   | 4-Hydroxybenzoic acid, ethyl ester                                |
| 166,062988  | C9H10O3     | 121-32-4   | Ethyl vanillin                                                    |
| 166,0629942 | C9H10O3     |            | octadecanol - corres acid 4                                       |
| 166,074234  | C8H10N2O2   | 6342-56-9  | Pyruvaldehyde, 1-(dimethyl acetal)                                |
| 166,075882  | C6H15O3P    | 122-52-1   | Phosphorous acid, triethyl ester                                  |
| 166,09938   | C10H14O2    | 98-29-3    | 4-tert-butylcatechol                                              |
| 166,09938   | C10H14O2    | 1948-33-0  | tert-butyl-Hydroquinone (TBHQ)                                    |
| 166,09938   | C10H14O2    | 98-29-3    | 4-tert-Butylpyrocatechol                                          |
| 166,986343  | C7H5NS2     | 149-30-4   | 2-Mercaptobenzothiazole                                           |
| 167,131012  | C10H17NO    | 6837-24-7  | N-Cyclohexyl-2-pyrrolidone                                        |
| 168,089874  | C8H12N2O2   | 822-06-0   | Hexamethylene diisocyanate                                        |
| 168,115036  | C10H16O2    | 101-43-9   | Methacrylic acid, cyclohexyl ester                                |
| 168,187805  | C12H24      | 112-41-4   | 1-Dodecene                                                        |
| 169,0891744 | C12H11N     |            | 4-Aminobiphenyl                                                   |
| 169,110275  | C9H15NO2    | 2873-97-4  | Diacetone arylamide                                               |
| 169,1102787 | C9H15NO2    |            | 1-pentyl-2,5-pyrrolidine-dione                                    |
| 170,013458  | C8H7ClO2    | 501-53-1   | Benzyl chloroformate                                              |
| 170,02153   | C7H6O5      | 26677-99-6 | Acrylic acid-maleic acid, copolymer                               |
| 170,024689  | C7H7ClN2O   | 140-39-6   | Acetic acid, p-tolyl ester                                        |
| 170,057907  | C8H10O4     | 2274-11-5  | Acrylic acid, diester with ethyleneglycol                         |
| 170,073166  | C12H10O     | 1131-60-8  | biphenyl-4-ol                                                     |
| 170,073166  | C12H10O     | 90-43-7    | 2-Phenylphenol                                                    |
| 170,073166  | C12H10O     | 92-69-3    | 4-phenylphenol                                                    |
| 170,07319   | C12H10O     |            | diphenyl oxide                                                    |
| 170,07319   | C12H10O     |            | 2-hydroxybiphenyl                                                 |
| 170,130676  | C10H18O2    | 78-66-0    | 3,6-Dimethyl-4-Octyn-3,6-Diol                                     |
| 170,141907  | C9H18N2O    | 5205-93-6  | N-(Dimethylaminopropyl)methacrylamide                             |
| 170,178299  | C10H22N2    | 2855-13-2  | 1-Amino-3-Aminoethyl-3,5,5-trimethylcyclohexane                   |
| 170,2034759 | C12H26      |            | dodecane                                                          |
| 171,0354    | C7H9NO2S    | 70-55-3    | p-Toluenesulfonamide                                              |
| 171,0354    | C7H9NO2S    | 1333-07-9  | Toluenesulphonamide                                               |
| 171,0354    | C7H9NO2S    | 88-19-7    | o-Toluenesulphonamide                                             |
| 171,104797  | C12H13N     | 10420-89-0 | 1-Naphthalenemethanamine, .alpha.-methyl-, (S)-                   |
| 171,104797  | C12H13N     | 3886-70-2  | 1-Naphthalenemethanamine, .alpha.-methyl-, (R)-                   |
| 171,125931  | C9H17NO2    | 2426-54-2  | Acrylic acid, 2-(diethylamino)ethyl ester                         |
| 171,1623143 | C10H21NO    |            | 2,2,6,6-tetramethyl-piperidine methyl ether                       |
| 171,1623143 | C10H21NO    |            | 4-hydroxy-1,2,2,6,6-pentamethylpiperidine                         |
| 172,019409  | C7H8O3S     | 88-20-0    | Toluene-2-sulphonic acid                                          |
| 172,019409  | C7H8O3S     | 104-15-4   | p-Toluenesulphonic acid                                           |
| 172,019409  | C7H8O3S     | 70788-37-3 | 2(Or 4)-toluenesulphonic acid                                     |



|             |            |             |                                                                                                   |
|-------------|------------|-------------|---------------------------------------------------------------------------------------------------|
| 172,073563  | C8H12O4    | 1076-97-7   | 1,4-Cyclohexanedicarboxylic acid                                                                  |
| 172,133209  | C9H18NO2   | 5039-78-1   | Methacrylic acid, ester with trimethylethanolammonium chloride                                    |
| 172,146332  | C10H20O2   | 334-48-5    | n-Decanoic acid                                                                                   |
| 172,146332  | C10H20O2   | 26762-92-5  | p-Menthane hydroperoxide                                                                          |
| 173,177963  | C10H23NO   | 102-81-8    | 2-Dibutylaminoethanol                                                                             |
| 173,963913  | C7H4Cl2O   | 457883-29-3 | 4,4'-Bis[(4-amino-6-morpholino-s-triazin-2-yl)amino]-2,2'-stilbenedisulphonic acid, disodium salt |
| 174,029007  | C8H7NaO3   | 5026-62-0   | Benzoic acid, p-hydroxy-, methyl ester, sodium salt                                               |
| 174,029282  | C8H7NaO3   | 5026-62-0   | Methylparaben Sodium Salt                                                                         |
| 174,042923  | C9H6N2O2   | 584-84-9    | 2,4-Toluene diisocyanate                                                                          |
| 174,042923  | C9H6N2O2   | 91-08-7     | 2,6-Toluene diisocyanate                                                                          |
| 174,042923  | C9H6N2O2   | 26471-62-5  | Toluene diisocyanate                                                                              |
| 174,089203  | C8H14O4    | 2224-15-9   | Ethane, 1,2-bis(2,3-epoxypropoxy)-                                                                |
| 174,089203  | C8H14O4    | 502-44-3    | Caprolactone                                                                                      |
| 174,089203  | C8H14O4    | 627-93-0    | Adipic acid, dimethyl ester                                                                       |
| 174,089234  | C8H14O4    |             | Dimethyl adipate                                                                                  |
| 174,125595  | C9H18O3    | 927-07-1    | tert-Butylperoxy pivalate                                                                         |
| 174,952789  | C3H6KNOS2  | 51026-28-9  | N-Hydroxymethyl-N-methyldithiocarbamic acid, potassium salt                                       |
| 175,979568  | C7H6Cl2O   | 1777-82-8   | Benzyl alcohol, 2,4-dichloro-                                                                     |
| 176,032089  | C6H8O6     | 50-81-7     | Ascorbic acid (vitamin C)                                                                         |
| 176,068466  | C7H12O5    | 25395-31-7  | Glycerol diacetate                                                                                |
| 176,083725  | C11H12O2   | 18096-62-3  | Indeno[1,2-d]-m-dioxin, 4,4a,5,9b-tetrahydro-                                                     |
| 176,083725  | C11H12O2   | 2495-37-6   | Methacrylic acid, benzyl ester                                                                    |
| 176,104858  | C8H16O4    | 2372-21-6   | O,O-tert-Butyl isopropyl monoperoxycarbonate                                                      |
| 176,120117  | C12H16O    | 1130-60-8   | 2-Cyclohexylphenol                                                                                |
| 176,932007  | C2H4KNO2S2 | 137-41-7    | Methyldithiocarbamic acid, potassium salt                                                         |
| 178,029984  | C6H10O4S   | 111-17-1    | Thiodipropionic acid                                                                              |
| 178,029984  | C6H10O4S   | 693-36-7    | Thiodipropionic acid, dioctadecyl ester                                                           |
| 178,047745  | C6H10O6    | 90-80-2     | Gluconic acid lactone                                                                             |
| 178,058975  | C5H10N2O5  | 1854-26-8   | N,N'-Bis(hydroxymethyl)-4,5-dihydroxyethyleneurea                                                 |
| 178,0782754 | C14H10     |             | Anthracene                                                                                        |
| 178,0993797 | C11H14O2   |             | butyl benzoate                                                                                    |
| 178,0993797 | C11H14O2   |             | 2-tert-butyl-6-methyl-benzoquinone                                                                |
| 178,09938   | C11H14O2   | 136-60-7    | Benzoic acid, butyl ester                                                                         |
| 180,042252  | C9H8O4     | 120-61-6    | Terephthalic acid, dimethyl ester                                                                 |
| 180,063385  | C6H12O6    | 50-99-7     | D-Glucose                                                                                         |
| 180,063385  | C6H12O6    | 57-48-7     | Fructose, D-                                                                                      |
| 180,068741  | C12H8N2    | 66-71-7     | phenanthroline                                                                                    |
| 180,078644  | C10H12O3   | 4191-73-5   | 4-Hydroxybenzoic acid, isopropyl ester                                                            |
| 180,078644  | C10H12O3   | 94-13-3     | 4-Hydroxybenzoic acid, propyl ester                                                               |
| 180,0786693 | C10H12O3   |             | propyl paraben                                                                                    |
| 180,115036  | C11H16O2   | 88-32-4     | 2-tert-Butyl-4-hydroxyanisole                                                                     |
| 180,115036  | C11H16O2   | 25013-16-5  | 2-tert-Butylhydroxyanisole (BHA)                                                                  |
| 180,115036  | C11H16O2   | 88-32-4     | 2-tert-Butyl-4-hydroxyanisole                                                                     |
| 181,110275  | C10H15NO2  | 120-07-0    | N-Phenyldiethanolamine                                                                            |
| 182,0215233 | C8H6O5     |             | isophthalic acid                                                                                  |
| 182,070801  | C6H15O4P   | 78-40-0     | Phosphoric acid, triethyl ester                                                                   |
| 182,073166  | C13H10O    | 119-61-9    | Benzophenone                                                                                      |
| 182,07319   | C13H10O    |             | Benzophenone                                                                                      |
| 182,0790382 | C6H14O6    |             | sorbitol                                                                                          |
| 182,079041  | C6H14O6    | 69-65-8     | Mannitol                                                                                          |
| 182,079041  | C6H14O6    | 50-70-4     | Sorbitol                                                                                          |
| 182,094299  | C10H14O3   | 104-68-7    | Ethanol, 2-(2-phenoxyethoxy)-                                                                     |
| 183,1623143 | C11H21NO   |             | 1-aza-2,2,6,6-tetramethyl-3-cyclohexeneethanol                                                    |
| 184,019409  | C8H8O3S    | 26914-43-2  | Styrenesulphonic acid                                                                             |
| 184,0524295 | C12H8O2    | 19922-72-6  | Benzenesulphonic acid, 4-ethenyl-, ammonium salt                                                  |
| 184,1000484 | C12H12N2   |             | Potassium p-vinylbenzenesulphonate                                                                |
| 184,1000734 | C12H12N2   |             | Benzenesulphonic acid, 2-ethenyl-, sodium salt                                                    |
| 184,1252005 | C14H16     |             | diphenoquinonone                                                                                  |
| 184,146332  | C11H20O2   | 103-11-7    | 4-aminodiphenylamine                                                                              |
| 184,146332  | C11H20O2   | 2499-59-4   | Benzidine                                                                                         |
| 184,146332  | C11H20O2   | 29590-42-9  | butadiene n=6                                                                                     |
| 185,141998  | C10H19NO2  | 105-16-8    | Acrylic acid, 2-ethylhexyl ester                                                                  |
| 185,876755  | C3Cl2O52   | 1192-52-5   | Acrylic acid, n-octyl ester                                                                       |
| 186,035065  | C8H10O3S   | 25321-41-9  | Acrylic acid, isooctyl ester                                                                      |
| 186,035065  | C8H10O3S   | 28804-47-9  | Methacrylic acid, 2-(diethylamino)ethylester                                                      |
| 186,035065  | C8H10O3S   | 80-48-8     | 4,5-Dichloro-1,2-dithiol-3-one                                                                    |
| 186,161987  | C11H22O2   | 2461-15-6   | Xylenesulphonic acid                                                                              |
| 186,198364  | C12H26O    | 112-53-8    | Toluenesulphonic acid, methyl ester                                                               |
| 187,0400313 | C8H10NO2Cl |             | p-Toluenesulphonic acid, methyl ester                                                             |
| 187,0858    | C9H9N5     | 91-76-9     | 2-Ethylhexyl-2,3-epoxypropyl ether                                                                |
| 188,044937  | C9H9NaO3   | 35285-68-8  | 1-Dodecanol                                                                                       |
| 188,079712  | C7H12N2O4  | 6440-58-0   | 4-Chloro-2,5-dimethoxyaniline                                                                     |
| 188,104858  | C9H16O4    | 123-99-9    | 2,4-Diamino-6-phenyl-1,3,5-triazine                                                               |
| 188,104858  | C9H16O4    | 7328-17-8   | Aqueous solution of methyl p-hydroxybenzoate in hydrogen peroxide                                 |
| 188,104858  | C9H16O4    | 16096-30-3  | 1,3-Bis(hydroxymethyl)-5,5-dimethylimidazolidine-2,4-dione                                        |
| 188,968277  | C7H4NNaS2  | 2492-26-4   | Azelaic acid                                                                                      |
| 189,045959  | C7H11NO3S  | 26447-09-6  | Acrylic acid, 2-((2-ethoxyethoxy)ethyl) ester                                                     |
| 189,045959  | C7H11NO3S  | 4124-42-9   | Oxirane, 2,2'-[[1-methyl-1,2-ethanediyl]bis(oxymethylene)]bis-                                    |
| 189,047103  | C12H10Cl   |             | 2-Mercaptobenzothiazole, sodium salt                                                              |
| 189,985519  | C7H7ClO2S  | 26763-71-3  | Ammonium toluenesulphonate                                                                        |
| 189,985519  | C7H7ClO2S  | 98-59-9     | Ammonium toluene-4-sulphonate                                                                     |
| 190,102524  | C8H18O3Si  | 78-08-0     | PCB 1                                                                                             |
| 190,120514  | C9H18O4    | 26402-23-3  | Toluenesulphonyl chloride                                                                         |
| 190,120514  | C9H18O4    | 88917-22-0  | Benzenesulfonyl chloride, 4-methyl-                                                               |
| 190,1357652 | C13H18O    |             | Vinyltriethoxysilane                                                                              |
| 190,156891  | C10H22O3   | 29911-28-2  | Glycerol monohexanoate                                                                            |
| 190,1721507 | C14H22     |             | Dipropyleneglycol methyl ether acetate                                                            |
| 190,1721507 | C14H22     |             | 3-methyl-5-tert-butyl-4-hydroxy styrene                                                           |
| 191,069473  | C9H9N3O2   | 10605-21-7  | Dipropyleneglycol n-butyl ether                                                                   |
| 191,094635  | C11H13NO2  | 93-68-5     | 1,3-di-tert-butyl-benzene                                                                         |
| 191,152145  | C9H21NO3   | 122-20-3    | 1,3-di-tert-butyl-benzene                                                                         |
| 192,005875  | C9H4O5     | 552-30-7    | Methyl benzimidazolecarbamate                                                                     |
| 192,0270026 | C6H8O7     |             | o-Acetoacetotoluidide                                                                             |
| 192,027008  | C6H8O7     | 77-92-9     | Triisopropanolamine                                                                               |
| 192,055115  | C12H9NaO   | 132-27-4    | Trimellitic anhydride                                                                             |
| 192,078644  | C11H12O3   | 56641-05-5  | citric acid                                                                                       |
| 192,078644  | C11H12O3   | 48145-04-6  | Citric acid                                                                                       |
| 192,1150298 | C12H16O2   |             | 2-Phenylphenol, sodium salt                                                                       |
| 192,1150298 | C12H16O2   |             | Poly(oxy-1,2-ethanediyl),.alpha.-(1-oxo-2-propenyl)-.omega.-phenoxy-                              |
| 192,115036  | C12H16O2   | 2208-05-1   | Acrylic acid, 2-phenoxyethyl ester                                                                |
| 192,136154  | C9H20O4    | 24800-44-0  | 2,4-dimethylpropylbenzoate                                                                        |
| 193,08696   | C8H16ClNO2 | 44992-01-0  | 3-methyl-5-tert-butyl-4-hydroxy benzaldehyde                                                      |
| 193,089142  | C14H11N    | 948-65-2    | Benzoic acid, 2-(dimethylamino)ethyl ester                                                        |
| 193,110275  | C11H15NO2  | 10287-53-3  | Tripropyleneglycol                                                                                |
| 193,1103038 | C11H15NO2  |             | Acrylic acid, ester with trimethylethanolammonium chloride                                        |
| 194,001358  | C7H7NaO3S  | 657-84-1    | 2-Phenylindole                                                                                    |
| 194,001358  | C7H7NaO3S  | 12068-03-0  | 4-Dimethylaminobenzoic acid, ethyl ester                                                          |
| 194,057907  | C10H10O4   | 1459-93-4   | Ethyl-4-dimethylaminobenzoate                                                                     |
| 194,057907  | C10H10O4   | 131-11-3    | Sodium toluene-4-sulphonate                                                                       |
| 194,0579088 | C10H10O4   |             | Sodium toluenesulphonate                                                                          |
| 194,0579088 | C10H10O4   |             | Isophthalic acid, dimethyl ester                                                                  |
| 194,0579338 | C10H10O4   |             | Phthalic acid, dimethyl ester                                                                     |
| 194,093994  | C11H14O3   | 23676-09-7  | dimethyl terephthalate                                                                            |
|             |            |             | dimethylphthalate                                                                                 |
|             |            |             | Dimethyl phthalate                                                                                |
|             |            |             | 4-Ethoxybenzoic acid, ethyl ester                                                                 |

|             |            |             |                                                                                                                                                           |
|-------------|------------|-------------|-----------------------------------------------------------------------------------------------------------------------------------------------------------|
| 194,094299  | C11H14O3   | 94-26-8     | butylparaben                                                                                                                                              |
| 194,094299  | C11H14O3   | 614-45-9    | p-tert-Butylperoxy benzoate                                                                                                                               |
| 194,094299  | C11H14O3   | 614-45-9    | tert-Butylperoxy benzoate                                                                                                                                 |
| 194,094299  | C11H14O3   | 93965-02-7  | 4,4'-Bis[[4-[bis(2-hydroxyethyl)amino]-6-(p-sulphoanilino)-s-triazin-2-yl]amino]-2,2'-stilbenedisulphonic acid, sodium salt, compound with diethanolamine |
| 194,107178  | C8H19O3P   | 4724-48-5   | n-Octylphosphonic acid                                                                                                                                    |
| 194,115417  | C8H18O5    | 112-60-7    | Tetraethyleneglycol                                                                                                                                       |
| 194,115417  | C8H18O5    | 25322-68-3  | Polyethyleneglycol                                                                                                                                        |
| 194,130676  | C12H18O2   | 26762-93-6  | Diisopropylbenzene hydroperoxide                                                                                                                          |
| 194,130997  | C12H18O2   | 98-49-7     | 1-(4-Isopropylphenyl)-1-methylethyl hydroperoxide                                                                                                         |
| 194,141907  | C11H18N2O  | 25646-77-9  | Ethanol, 2-[(4-amino-3-methylphenyl)ethylamino]-, sulfate (1:1)(salt)                                                                                     |
| 195,0354    | C9H9NO2S   | 10154-75-3  | 3-(Phenylsulphonyl)propionitrile                                                                                                                          |
| 195,125931  | C11H17NO2  | 3490-06-0   | Benzeneeethanamine, 3,4-dimethoxy-N-methyl-                                                                                                               |
| 195,125931  | C11H17NO2  | 3077-12-1   | Ethanol, 2,2'-(p-tolylimino)di-                                                                                                                           |
| 195,924942  | C6H3Cl3O   | 25167-82-2  | Trichlorophenol                                                                                                                                           |
| 195,924942  | C6H3Cl3O   | 88-06-2     | 2,4,6-Trichlorophenol                                                                                                                                     |
| 196,055801  | C10H12O2S  | 3454-29-3   | Trimethylolpropane triglycidylether                                                                                                                       |
| 196,058304  | C6H12O7    | 133-42-6    | Gluconic acid                                                                                                                                             |
| 196,058304  | C6H12O7    | 526-95-4    | Gluconic acid                                                                                                                                             |
| 196,088821  | C14H12O    | 131-58-8    | 2-Methylbenzophenone                                                                                                                                      |
| 196,088821  | C14H12O    | 134-84-9    | 4-Methylbenzophenone                                                                                                                                      |
| 196,088821  | C14H12O    | 643-65-2    | 3-Methylbenzophenone                                                                                                                                      |
| 196,08884   | C14H12O    |             | 2-Methylbenzophenone                                                                                                                                      |
| 196,08884   | C14H12O    |             | 3-Methylbenzophenone                                                                                                                                      |
| 196,08884   | C14H12O    |             | 4-Methylbenzophenone                                                                                                                                      |
| 196,145996  | C12H20O2   | 26896-48-0  | Tricyclodecanedimethanol                                                                                                                                  |
| 196,146332  | C12H20O2   | 86178-38-3  | 3,3,5-Trimethylcyclohexyl acrylate                                                                                                                        |
| 196,219101  | C14H28     | 1120-36-1   | 1-Tetradecene                                                                                                                                             |
| 197,105194  | C10H15NO3  | 25086-89-9  | Vinyl acetate-vinylpyrrolidone, copolymer                                                                                                                 |
| 197,116425  | C9H15N3O2  | 3089-19-8   | N-[2-(2-Oxo-1-imidazolidinyl)ethyl]methacrylamide                                                                                                         |
| 197,129486  | C7H20ClN3O | 42751-79-1  | Dimethylamine-ethylenediamine-epichlorohydrin, copolymer                                                                                                  |
| 197,152817  | C10H19N3O  | 29782-73-8  | DL-Alanine, N-methyl-, monopotassium salt                                                                                                                 |
| 197,177963  | C12H23NO   | 947-04-6    | Lauro lactam                                                                                                                                              |
| 197,2128016 | C13H25DN   |             | 13-oxo-tridecanoic acid amide                                                                                                                             |
| 198,0588994 | C9H12NO2S  |             | N-Ethyl-p-toluene-sulphonamide                                                                                                                            |
| 198,0681046 | C13H10O2   |             | 4-Hydroxybenzophenone                                                                                                                                     |
| 198,0681046 | C13H10O2   |             | 2-Hydroxybenzophenone                                                                                                                                     |
| 198,089203  | C10H14O4   | 104-38-1    | Ethanol, 2,2'-(p-phenylenedioxy)di-                                                                                                                       |
| 198,089203  | C10H14O4   | 1070-70-8   | Acrylic acid, diester with 1,4-butanediol                                                                                                                 |
| 198,089203  | C10H14O4   | 19485-03-1  | Acrylic acid, diester with 1,3-butanediol                                                                                                                 |
| 198,089203  | C10H14O4   | 97-90-5     | Methacrylic acid, diester with ethyleneglycol                                                                                                             |
| 198,104462  | C14H14O    | 1988-89-2   | 4-(1-phenylethyl)phenol                                                                                                                                   |
| 198,104462  | C14H14O    | 4237-44-9   | Phenol, o-(.alpha.-methylbenzyl)-                                                                                                                         |
| 198,115692  | C13H14N2   | 101-77-9    | Bis(4-aminophenyl)methane                                                                                                                                 |
| 198,115692  | C13H14N2   | 1208-52-2   | 2,4'-Diaminodiphenylmethane                                                                                                                               |
| 198,115692  | C13H14N2   | 6582-52-1   | Aniline, 2,2'-methylenedi-                                                                                                                                |
| 198,1157235 | C13H14N2   |             | 4,4'-Methylenedianiline                                                                                                                                   |
| 198,1157235 | C13H14N2   |             | 2,4'-Methylenedianiline                                                                                                                                   |
| 198,1157235 | C13H14N2   |             | 2,2'-Methylenedianiline                                                                                                                                   |
| 198,948013  | C3H6BrNO4  | 52-51-7     | 2-Bromo-2-nitro-1,3-propanediol                                                                                                                           |
| 199,045563  | C12H9NS    | 92-84-2     | Phenothiazine                                                                                                                                             |
| 199,066696  | C9H13NO2S  | 8047-99-2   | N-Ethyl-toluenesulphonamide (NETSA)                                                                                                                       |
| 199,2299999 | C13H29N    |             | Atmer 163 primary amine C13                                                                                                                               |
| 200,05072   | C9H12O3S   | 28631-63-2  | Cumenesulfonic acid .                                                                                                                                     |
| 200,05072   | C9H12O3S   | 37953-05-2  | Cumenesulphonic acid                                                                                                                                      |
| 200,05072   | C9H12O3S   | 80-40-0     | p-Toluenesulfonic acid, ethyl ester                                                                                                                       |
| 200,079712  | C8H12N2O4  | 868-63-3    | N,N'-(1,2-Dihydroxyethylene)bisacrylamide                                                                                                                 |
| 200,083725  | C13H12O2   | 620-92-8    | Bis(4-hydroxyphenyl)methane                                                                                                                               |
| 200,083725  | C13H12O2   | 2467-02-9   | 2,2'-Methylenediphenol                                                                                                                                    |
| 200,083725  | C13H12O2   | 2467-03-0   | 2-(4-hydroxybenzyl)phenol                                                                                                                                 |
| 200,0837296 | C13H12O2   |             | bisphenol F (BPF)                                                                                                                                         |
| 200,094955  | C12H12N2O  | 101-80-4    | Aniline, 4,4'-oxydi-                                                                                                                                      |
| 200,094988  | C12H12N2O  |             | 4,4'-Diaminodiphenylether                                                                                                                                 |
| 200,104858  | C10H16O4   | 66492-51-1  | Acrylic acid, (5-ethyl-1,3-dioxan-5-yl)methyl ester                                                                                                       |
| 200,177628  | C12H24O2   | 143-07-7    | Lauric acid                                                                                                                                               |
| 200,177628  | C12H24O2   | 68609-96-1  | Oxirane, mono[(C8-10-alkyloxy)methyl] derivs                                                                                                              |
| 201,958832  | C8H4Cl2O2  | 99-63-8     | Isophthalic acid dichloride                                                                                                                               |
| 202,039856  | C8H15CoO2  | 13586-82-8  | 2-Ethylhexanoic acid, cobalt salt                                                                                                                         |
| 202,060593  | C10H11NaO3 | 35285-69-9  | Benzoic acid, 4-hydroxy-, propyl ester, sodium salt                                                                                                       |
| 202,060593  | C10H11NaO3 | 35285-69-9  | Aqueous solution of propyl p-hydroxybenzoate in hydrogen peroxide                                                                                         |
| 202,09938   | C13H14O2   | 50976-02-8  | Acrylic acid, dicyclopentadienyl ester                                                                                                                    |
| 202,120514  | C10H18O4   | 111-20-6    | Sebacic acid                                                                                                                                              |
| 202,120514  | C10H18O4   | 141-28-6    | Adipic acid, diethyl ester                                                                                                                                |
| 202,120514  | C10H18O4   | 2425-79-8   | 1,4-Butanediol bis(2,3-epoxypropyl) ether                                                                                                                 |
| 202,175522  | C12H26S    | 112-55-0    | Dodecylmercaptan                                                                                                                                          |
| 202,193283  | C12H26O2   | 129228-21-3 | 3,3-Bis(methoxymethyl)-2,5-dimethylhexane                                                                                                                 |
| 203,061615  | C8H13NO3S  | 26447-10-9  | Xylenesulphonic acid, ammonium salt                                                                                                                       |
| 203,061615  | C8H13NO3S  | 26447-10-9  | Ammonium xylenesulphonate                                                                                                                                 |
| 204,115005  | C13H16O2   | 12542-30-2  | Acrylic acid, dicyclopentenyl ester                                                                                                                       |
| 204,115036  | C13H16O2   | 125-12-2    | Cyclopentyl(phenyl)acetic acid                                                                                                                            |
| 204,1150548 | C13H16O2   |             | 1-Hydroxycyclohexyl-1-phenylketone                                                                                                                        |
| 204,118393  | C10H20O2S  | 25103-09-7  | Isooctyl mercaptoacetate                                                                                                                                  |
| 204,1184006 | C10H20O2S  |             | 2-ethylhexyl mercaptoacetate                                                                                                                              |
| 205,110275  | C12H15NO2  | 97-36-9     | 2',4'-Acetoacetoxylidide                                                                                                                                  |
| 205,1592403 | C14H21O    |             | 2,4-di-t-butyl phenol                                                                                                                                     |
| 205,1592403 | C14H21O    |             | 2,6-di-t-butyl phenol                                                                                                                                     |
| 205,974518  | C2H8O7P2   | 68155-93-1  | Dimethylacidpyrophosphate                                                                                                                                 |
| 206,001358  | C8H7NaO3S  | 2695-37-6   | Benzenesulfonic acid, 4-ethenyl-, sodium salt                                                                                                             |
| 206,0579088 | C11H10O4   |             | methyl vinyl terephthalate                                                                                                                                |
| 206,079041  | C8H14O6    | 16066-38-9  | Dipropyl peroxydicarbonate                                                                                                                                |
| 206,079041  | C8H14O6    | 105-64-6    | Bis(isopropyl) peroxydicarbonate                                                                                                                          |
| 206,094299  | C12H14O3   | 99880-64-5  | Glycerol dibehenate                                                                                                                                       |
| 206,130676  | C13H18O2   | 3101-60-8   | Propane, 1-(p-tert-butylphenoxy)-2,3-epoxy-                                                                                                               |
| 206,130676  | C13H18O2   | 7191-39-1   | Acetophenone, 2'-(pentyloxy)-                                                                                                                             |
| 206,1306798 | C13H18O2   |             | 3-methyl-5-tert-butyl-4-hydroxy acetophenone                                                                                                              |
| 206,15181   | C10H22O4   | 25498-49-1  | Tripropyleneglycol monomethyl ether                                                                                                                       |
| 206,1670653 | C14H22O    | 18206-26-4  | octylphenol                                                                                                                                               |
| 206,1670653 | C14H22O    |             | 2,4-bis(1,1-dimethylethyl)phenol                                                                                                                          |
| 206,1670653 | C14H22O    |             | 2,4-di-tert-butylphenol                                                                                                                                   |
| 206,1670653 | C14H22O    |             | 2,6-di-tert-butylphenol                                                                                                                                   |
| 206,167068  | C14H22O    | 140-66-9    | 4-(1,1,3,3-Tetramethylbutyl)phenol                                                                                                                        |
| 206,167068  | C14H22O    | 96-76-4     | 2,4-Di-t-butylphenol                                                                                                                                      |
| 206,1670904 | C14H22O    |             | 4-tert-octylphenol                                                                                                                                        |
| 207,056534  | C7H13NO4S  | 15214-89-8  | 2-Acrylamido-2-methylpropanesulphonic acid                                                                                                                |
| 207,056534  | C7H13NO4S  |             | Sodium 2-methyl-2-[(1-oxoallyl)amino]propanesulphonic acid                                                                                                |
| 207,056534  | C7H13NO4S  | 5165-97-9   |                                                                                                                                                           |
| 207,089539  | C11H13NO3  | 92-15-9     | o-Acetoacetanisidide                                                                                                                                      |
| 207,1026    | C9H18ClNO2 | 5039-78-1   | Methacrylic acid, ester with (N,N,N-trimethyl)ethanolammonium chloride                                                                                    |
| 207,881857  | C2O4Sn     | 814-94-8    | Tin(II) oxalate                                                                                                                                           |
| 208,017014  | C8H9NaO3S  | 1300-72-7   | Sodium xylenesulphonate                                                                                                                                   |
| 208,019409  | C10H8O3S   | 130-14-3    | Sodium naphthalene-1-sulphonate                                                                                                                           |
| 208,019409  | C10H8O3S   | 68153-01-5  | Naphthalenesulphonic acids                                                                                                                                |
| 208,019409  | C10H8O3S   | 120-18-3    | 2-naphthalenesulfonic acid                                                                                                                                |
| 208,019409  | C10H8O3S   | 85-47-2     | 1-Naphthalenesulphonic acid                                                                                                                               |
| 208,029053  | C12H9KO    | 13707-65-8  | 2-Phenylphenol, potassium salt                                                                                                                            |
| 208,052429  | C14H8O2    | 84-65-1     | Antraquinone                                                                                                                                              |

|             |             |             |                                                                                                                  |
|-------------|-------------|-------------|------------------------------------------------------------------------------------------------------------------|
| 208,052429  | C14H8O2     | 84-66-2     | Phthalic acid, diethyl ester                                                                                     |
| 208,0735589 | C11H12O4    |             | methylethyl terephthalate                                                                                        |
| 208,10994   | C12H16O3    | 6175-45-7   | Acetophenone, 2,2-diethoxy-                                                                                      |
| 208,146332  | C13H20O2    | 3457-61-2   | tert-Butyl cumyl peroxide                                                                                        |
| 208,146332  | C13H20O2    | 5888-33-5   | exo-1,7,7-Trimethylbicyclo(2.2.1)hept-2-yl acrylate                                                              |
| 209,1330255 | C16H17      |             | styrene dimer                                                                                                    |
| 209,9406229 | C7H5OCi3    |             | trichloroanisole                                                                                                 |
| 209,975296  | C7H7KO3S    | 30526-22-8  | Potassium toluenesulphonate                                                                                      |
| 210,016434  | C9H6O6      | 528-44-9    | 1,2,4-Benzenetricarboxylic acid                                                                                  |
| 210,020493  | C8H10CaO4   | 491589-22-1 | cis-1,2-Cyclohexanedicarboxylic acid, calcium salt                                                               |
| 210,042923  | C12H6N2O2   | 3173-72-6   | 1,5-Naphthalene diisocyanate                                                                                     |
| 210,089203  | C11H14O4    | 20587-61-5  | Ethanol, 2-[2-(benzoyloxy)ethoxy]-                                                                               |
| 210,102097  | C8H19O4P    | 107-66-4    | Phosphoric acid, dibutyl ester                                                                                   |
| 210,136826  | C11H18N2O2  | 28679-16-5  | Mixture of (40% w/w) 2,2,4-trimethylhexane-1,6-diisocyanate and (60% w/w) 2,4,4-trimethylhexane-1,6-diisocyanate |
| 210,136826  | C11H18N2O2  | 15646-96-5  | 2,4,4-Trimethylhexane-1,6-diisocyanate                                                                           |
| 210,136826  | C11H18N2O2  | 28679-16-5  | trimethylhexamethylene diisocyanate                                                                              |
| 210,136826  | C11H18N2O2  | 16938-22-0  | 2,2,4-Trimethylhexane-1,6-diisocyanate                                                                           |
| 210,1408506 | C16H18      |             | butadiene n=7                                                                                                    |
| 210,161987  | C13H22O2    | 7779-31-9   | 3,3,5-Trimethylcyclohexyl methacrylate                                                                           |
| 210,161987  | C13H22O2    | 84100-23-2  | Acrylic acid, 4-(1,1-dimethylethyl)cyclohexyl ester                                                              |
| 210,209595  | C13H26N2    | 1761-71-3   | Bis(4-Aminocyclohexyl)methane                                                                                    |
| 212,058578  | C12H8N2O2   | 1742-95-6   | Naphthalimide, 4-amino-                                                                                          |
| 212,068466  | C10H12O5    | 121-79-9    | Gallic acid, propyl ester                                                                                        |
| 212,0837    | C14H12O2    |             | Bisphenol E                                                                                                      |
| 212,083725  | C14H12O2    | 119-53-9    | Benzoin                                                                                                          |
| 212,083725  | C14H12O2    | 120-51-4    | benzyl benzoate                                                                                                  |
| 212,104858  | C11H16O4    | 2223-82-7   | Acrylic acid, diester with 2,2-dimethyl-1,3-propanediol                                                          |
| 212,1313736 | C14H16N2    |             | 3,3'-Dimethylbenzidine                                                                                           |
| 212,1565257 | C16H20      |             | Diisopropyl naphthalene                                                                                          |
| 212,177628  | C13H24O2    | 1330-61-6   | Acrylic acid, isodecyl ester                                                                                     |
| 212,177628  | C13H24O2    | 2156-96-9   | Acrylic acid, decyl ester                                                                                        |
| 212,958939  | C8H5BrFN    | 122-18-9    | Benzylhexadecyldimethylammonium chloride                                                                         |
| 213,0823745 | C10H15NO2S  |             | N-butylbenzenesulfoneamide                                                                                       |
| 213,118729  | C11H19NO5   | 26530-20-1  | 2-Octyl-4-isothiazolin-3-one                                                                                     |
| 213,2092645 | C13H27NO    |             | N,N-hexamethylenebisformamide                                                                                    |
| 213,24565   | C14H31N     |             | Atmer 163 primary amine C14                                                                                      |
| 213,962997  | C8H7BrO2    | 2491-38-5   | α-Bromo-4-hydroxyacetophenone                                                                                    |
| 213,962997  | C8H7BrO2    | 61791-99-9  | 2-Bromo-4'-hydroxyacetophenone                                                                                   |
| 213,9865    | C4HO2F7     |             | PFBA                                                                                                             |
| 214,052002  | C8H14CaO4   | 5743-36-2   | Calcium butyrate                                                                                                 |
| 214,062988  | C13H10O3    | 131-56-6    | 2,4-Dihydroxybenzophenone                                                                                        |
| 214,062988  | C13H10O3    | 611-99-4    | 4,4'-Dihydroxybenzophenone                                                                                       |
| 214,062988  | C13H10O3    | 102-09-0    | Diphenyl carbonate                                                                                               |
| 214,062988  | C13H10O3    | 118-55-8    | Salicylic acid, phenyl ester                                                                                     |
| 214,084122  | C10H14O5    | 4074-88-8   | Acrylic acid, diester with diethyleneglycol                                                                      |
| 214,22966   | C14H30O     | 112-72-1    | Tetradecanol                                                                                                     |
| 215,115753  | C10H17NO4   | 63225-53-6  | Acrylic acid, 2-[[[(butylamino)carbonyl]oxy]ethyl ester                                                          |
| 216,006836  | C6H9NaO5S   | 15717-25-6  | Acrylic acid, ester with 3-hydroxy-1-propanesulfonic acid sodium salt                                            |
| 216,006836  | C6H9NaO5S   | 1804-87-1   | Sodium 2-sulphonatoethyl methacrylate                                                                            |
| 216,042252  | C12H8O4     | 1141-38-4   | 2,6-Naphthalenedicarboxylic acid                                                                                 |
| 216,063385  | C9H12O6     | 50940-49-3  | Butanedioic acid, mono[2-[(1-oxo-2-propenyl)oxy]ethyl] ester                                                     |
| 216,0721191 | C12H12N2S   |             | 4,4'-thiodianiline                                                                                               |
| 216,115     | C14H16O2    |             | Bisphenol B                                                                                                      |
| 216,136154  | C11H20O4    | 17557-23-2  | Propane, 1,3-bis(2,3-epoxypropoxy)-2,2-dimethyl-                                                                 |
| 216,136154  | C11H20O4    | 7328-16-7   | acrylic acid, 2-(2-butoxyethoxy)ethyl ester                                                                      |
| 216,172546  | C12H24O3    | 3006-82-4   | tert-Butyl 2-ethylperoxyhexanoate                                                                                |
| 217,077271  | C9H15NO3S   | 37475-88-0  | Ammonium cumenesulphonate                                                                                        |
| 217,906891  | C6H2Cl3NaO  | 1320-79-2   | Trichlorophenol, sodium salt                                                                                     |
| 217,985138  | C10H2O6     | 89-32-7     | Pyromellitic anhydride                                                                                           |
| 218,040146  | C12H10O2S   | 127-63-9    | Diphenyl sulphone                                                                                                |
| 218,040253  | C6H11NaO7   | 527-07-1    | Gluconic acid, monosodium salt                                                                                   |
| 218,079041  | C9H14O6     | 102-76-1    | Glycerol triacetate                                                                                              |
| 218,107361  | C11H19ClO2  | 42125-46-2  | Carbonochloridic acid, 4-(1,1-dimethylethyl)cyclohexyl ester                                                     |
| 218,15181   | C11H22O4    | 26402-26-6  | Glycerol monooctanoate                                                                                           |
| 219,104797  | C16H13N     | 90-30-2     | N-Phenyl-1-naphthylamine                                                                                         |
| 220,134247  | C10H21ClN2O | 51410-72-1  | Methacrylamidopropyltrimethylammonium chloride                                                                   |
| 220,1463299 | C14H20O2    |             | 2,6-di-tert-butylbenzoquinone                                                                                    |
| 220,146332  | C14H20O2    | 68400-54-4  | 1-Propanone, 1-[4-(1,1-dimethylethyl)phenyl]-2-hydroxy-2-methyl-                                                 |
| 220,182709  | C15H24O     | 128-37-0    | 2,6-Di-tert-butyl-p-cresol                                                                                       |
| 220,182709  | C15H24O     | 84852-15-3  | 4-(7-methyloctyl)phenol                                                                                          |
| 220,1827154 | C15H24O     | 104-40-5    | nonylphenol                                                                                                      |
| 220,1827404 | C15H24O     |             | 4-nonyl phenols                                                                                                  |
| 221,144714  | C9H23NO3Si  | 919-30-2    | 3-Aminopropyltriethoxysilane                                                                                     |
| 222,032654  | C9H11NaO3S  | 32073-22-6  | Benzene, (1-methylethyl)-, monosulfo deriv., sodium salt                                                         |
| 222,032654  | C9H11NaO3S  | 28348-53-0  | Sodium cumenesulphonate                                                                                          |
| 222,056198  | C8H14O5S    | 3179-56-4   | Acetyl cyclohexanesulphonyl peroxide                                                                             |
| 222,089203  | C12H14O4    | 101-90-6    | Resorcinol diglycidyl ether                                                                                      |
| 222,089203  | C12H14O4    | 16969-10-1  | Acrylic acid, 2-hydroxy-3-phenoxypropyl ester                                                                    |
| 222,0892089 | C12H14O4    |             | diethyl terephthalate                                                                                            |
| 222,089234  | C12H14O4    |             | Diethyl phthalate                                                                                                |
| 222,089234  | C12H14O4    |             | Diethyl phthalate                                                                                                |
| 222,110336  | C9H18O6     | 80181-31-3  | 3-Hydroxybutanoic acid-3-hydroxypentanoic acid, copolymer                                                        |
| 222,1255944 | C13H18O3    |             | octadecanol - corres acid 3                                                                                      |
| 222,136826  | C12H18N2O2  | 4098-71-9   | 1-Isocyanato-3 -isocyanatomethyl-3,5,5-trimethylcyclohexane                                                      |
| 222,140854  | C17H18      | 9011-11-4   | α-Methylstyrene-styrene copolymers                                                                               |
| 222,161987  | C14H22O2    | 7534-94-3   | (1R,2R,4R)-1,7,7-trimethylbicyclo[2.2.1]hept-2-yl methacrylate                                                   |
| 223,0081307 | C12H9Cl2    |             | PCB 2                                                                                                            |
| 223,1367903 | C10H23O3S   |             | Atmer 191 sulphonic acid C10                                                                                     |
| 223,157227  | C13H21NO2   | 38668-48-3  | 2-Propanol, 1,1'-[(4-methylphenyl)imino]bis-                                                                     |
| 223,990952  | C8H9KO3S    | 30346-73-7  | Potassium xylenesulphonate                                                                                       |
| 224,104858  | C12H16O4    | 106797-53-9 | 1-[4-(2-Hydroxyethoxy)phenyl]-2-hydroxy-2-methyl-1-propane-1-one                                                 |
| 224,117752  | C9H21O4P    | 513-02-0    | Phosphoric acid, triisopropyl ester                                                                              |
| 225,09021   | C13H11N3O   | 2440-22-4   | 2-(2'-Hydroxy-5'-methylphenyl)benzotriazole (UVA-P)                                                              |
| 225,090212  | C13H11N3O   |             | Tinuvin P                                                                                                        |
| 225,1153891 | C15H15NO    |             | 4-(dimethylamino)benzophenone                                                                                    |
| 225,1265975 | C14H15N3    |             | 4-amino-2,3'-dimethylazobenzidine                                                                                |
| 226,047745  | C10H10O6    | 102-39-6    | (1,3- Phenylenedioxy)diacetic acid                                                                               |
| 226,120514  | C12H18O4    | 3159-98-6   | 1,4-Bis(-hydroperoxyisopropyl)benzene                                                                            |
| 226,120514  | C12H18O4    | 13048-33-4  | Acrylic acid, diester with 1,6-hexanediol                                                                        |
| 226,120514  | C12H18O4    | 2082-81-7   | Methacrylic acid, diester with 1,4-butanediol                                                                    |
| 226,120514  | C12H18O4    | 721-26-6    | 1,3-Bis(α-hydroperoxyisopropyl)benzene                                                                           |
| 226,121002  | C12H18O4    | 64194-22-5  | Acrylic acid, 3-methyl-1,5-pentanediy ester                                                                      |
| 226,1469986 | C15H18N2    |             | 4,4'-methylenedi-o-toluidine                                                                                     |
| 226,193283  | C14H26O2    | 126-86-3    | 2,4,7,9-Tetramethyl-5-decyne-4,7-diol                                                                            |
| 226,957993  | C8H6BrNO2   | 7166-19-0   | 2-Bromo-2-nitrostyrene                                                                                           |
| 227,097992  | C11H17NO2S  | 1907-65-9   | N-Butyl-p-toluenesulphonamide                                                                                    |
| 227,236145  | C13H29N3    | 13590-97-1  | Dodecylguanidine hydrochloride                                                                                   |
| 227,2613001 | C15H33N     |             | Atmer 163 primary amine C15                                                                                      |
| 228,072113  | C13H12N2S   | 102-08-9    | N,N'-Diphenylthiourea                                                                                            |
| 228,078644  | C14H12O3    | 118-58-1    | Benzyl salicylate                                                                                                |
| 228,078644  | C14H12O3    | 131-57-7    | 2-Hydroxy-4-methoxy benzophenone                                                                                 |
| 228,078644  | C14H12O3    | 94-18-8     | 4-Hydroxybenzoic acid, benzyl ester                                                                              |
| 228,1150548 | C15H16O2    |             | bisphenol A                                                                                                      |
| 228,1361842 | C12H20O4    |             | Dibutyl maleate                                                                                                  |
| 228,172546  | C13H24O3    | 26761-45-5  | Neodecanoic acid, oxiranylmethyl ester                                                                           |
| 228,208923  | C14H28O2    | 298695-60-0 | 3-Ethyl-3-[(2-ethylhexyloxy)methyl]oxetane                                                                       |
| 228,208923  | C14H28O2    | 544-63-8    | Myristic acid                                                                                                    |



|             |              |                      |                                                                                                                                        |
|-------------|--------------|----------------------|----------------------------------------------------------------------------------------------------------------------------------------|
| 228,2089301 | C14H28O2     |                      | tetradecanoic acid, myristic acid                                                                                                      |
| 230,001358  | C10H7NaO3S   | 1321-69-3            | Naphthalenesulfonic acid, sodium salt                                                                                                  |
| 230,1518    | C12H22O4     |                      | Di-n-propyl adipate                                                                                                                    |
| 230,1518    | C12H22O4     |                      | Di-iso-propyl adipate                                                                                                                  |
| 230,15181   | C12H22O4     | 106-79-6             | Dimethyl sebacate                                                                                                                      |
| 230,15181   | C12H22O4     | 16096-31-4           | Oxirane, 2,2'-[1,6-hexanediylbis(oxyethylene)]bis-                                                                                     |
| 230,15181   | C12H22O4     | 693-23-2             | n-Dodecanedioic acid                                                                                                                   |
| 231,125931  | C14H17NO2    | 91-44-1              | Coumarin, 7-(diethylamino)-4-methyl-                                                                                                   |
| 232,017014  | C9H10Cl2N2O  | 330-54-1             | Diuron                                                                                                                                 |
| 232,074524  | C8H17NaO4S   | 126-92-1             | 2-Ethylhexylsulphuric acid, sodium salt                                                                                                |
| 232,134247  | C11H21ClN2O  | 26590-05-6           | Acrylamide-diallyldimethylammonium chloride, copolymer                                                                                 |
| 232,1827154 | C16H24O      |                      | 3,5-di-tert-butyl-4-hydroxystyrene                                                                                                     |
| 232,988998  | C6H10KO5S    | 31098-20-1           | Acrylic acid, 3-sulfopropyl ester, potassium salt                                                                                      |
| 233,011353  | C8H15O2Zr    | 18312-04-4           | Caprylic acid, zirconium salt                                                                                                          |
| 234,037567  | C8H10O8      | 123-23-9             | 4,4'-Dioxo-4,4'-dioxidybutyric acid                                                                                                    |
| 234,073959  | C9H14O7      | 1321-57-9            | (1-Methylethyl) dihydrogen 2-hydroxypropane-1,2,3-tricarboxylate                                                                       |
| 234,110336  | C10H18O6     | 16215-49-9           | Dibutyl peroxydicarbonate                                                                                                              |
| 234,110336  | C10H18O6     | 19910-65-7           | Bis-sec-butyl peroxydicarbonate                                                                                                        |
| 234,1255944 | C14H18O3     |                      | (2-methyl-6-tert-butyl-4-(propen-1-oiс)-2,5-cyclohexadiene-1-one) acid                                                                 |
| 234,1526902 | C15H10D6O2   |                      | BPA (methyl-d <sub>6</sub> )                                                                                                           |
| 234,16198   | C15H22O2     |                      | 3,5-di-tert-butyl-4-hydroxybenzaldehyde                                                                                                |
| 234,183105  | C12H26O4     | 2167-23-9            | di-tert-Butyl sec-butyldiene diperoxide                                                                                                |
| 234,198364  | C16H26O      | 4130-42-1            | 2,6-Di-tert-butyl-4-ethylphenol                                                                                                        |
| 234,198364  | C16H26O      | 121158-58-5          | Phenol, dodecyl-, branched                                                                                                             |
| 235,0705392 | C9H9N5O3     |                      | benzoguanamine                                                                                                                         |
| 235,157227  | C14H21NO2    | 14779-78-3           | Benzoic acid, p-(dimethylamino)-, pentyl ester (padimate A)                                                                            |
| 236,083725  | C16H12O2     | 84-51-5              | Anthraquinone, 2-ethyl-                                                                                                                |
| 236,125992  | C10H20O6     | 24937-93-7           | Polyester of adipic acid with 1,3-butanediol                                                                                           |
| 236,1412445 | C14H20O3     |                      | 3-methyl-5-tert-butyl-4-hydroxyphenyl propanoic acid                                                                                   |
| 236,156494  | C18H20       | 3910-35-8            | Indan, 1,1,3-trimethyl-3-phenyl-                                                                                                       |
| 236,156494  | C18H20       | 9017-27-0            | α-Methylstyrene-vinyltoluene copolymers                                                                                                |
| 236,156494  | C18H20       | 6362-80-7            | 2,4-Diphenyl-4-methyl-1-pentene                                                                                                        |
| 236,1565006 | C18H20       |                      | butadiene n=8                                                                                                                          |
| 236,177628  | C15H24O2     | 88-26-6              | 2,6-Di-tert-butyl-4-hydroxymethylphenol                                                                                                |
| 236,21402   | C16H28O      | 66068-84-6           | 4-(5,5,6-Trimethylbicyclo(2.2.1)hept-2-yl)cyclohexan-1-ol                                                                              |
| 237,078979  | C15H11NO2    | 82-38-2              | Solvent Red 111                                                                                                                        |
| 237,1524404 | C11H25O3S    |                      | Atmer 191 sulphonic acid C11                                                                                                           |
| 237,969315  | C9H6N2S3     | 21564-17-0           | 2-(Thiocyanomethylthio) benzothiazole                                                                                                  |
| 238,006592  | C9H11KO3S    | 28085-69-0           | Potassium cumenesulphonate                                                                                                             |
| 238,084122  | C12H14O5     | 211510-16-6#42536-99 | Mixture of Oxy-phenyl-acetic acid 2-[2-oxo-2-phenyl-acetoxy-ethoxy]-ethyl ester and Oxy-phenyl-acetic 2-[2-hydroxy-ethoxy]-ethyl ester |
| 238,09938   | C16H14O2     | 103-41-3             | Benzyl cinnamate                                                                                                                       |
| 238,133392  | C10H23O4P    | 3138-42-9            | Phosphoric acid, dipentyl ester                                                                                                        |
| 238,240906  | C15H30N2     | 6864-37-5            | 3,3'-Dimethyl-4,4'-diaminodicyclohexylmethane                                                                                          |
| 239,853378  | C3H2Br2N2O   | 10222-01-2           | 2,2-Dibromo-2-cyanoacetamide                                                                                                           |
| 239,930115  | C5H6BrClN2O2 | 16079-88-2           | 1-Bromo-3-chloro-5,5-dimethyl-2,4-imidazolidinedione                                                                                   |
| 239,988327  | C6H12N2S4    | 137-26-8             | Tetramethylthiuram disulphide                                                                                                          |
| 240,0786693 | C15H12O3     |                      | Methyl-2-benzoyl benzoate                                                                                                              |
| 240,078995  | C15H12O3     | 606-28-0             | Benzoic acid, 2-benzoyl-, methyl ester                                                                                                 |
| 240,126266  | C15H16N2O    | 621-00-1             | Carbanilide, 4,4'-dimethyl-                                                                                                            |
| 240,208923  | C15H28O2     | 2156-97-0            | Acrylic acid, dodecyl ester                                                                                                            |
| 242,057907  | C14H10O4     | 94-36-0              | Dibenzoyl peroxide                                                                                                                     |
| 242,115417  | C12H18O5     | 37275-47-1           | Acrylic acid, 2-ethyl-2-(hydroxymethyl)-1,3-propanediyl ester                                                                          |
| 242,260971  | C16H34O      | 36653-82-4           | 1-Hexadecanol                                                                                                                          |
| 243,2562147 | C15H33NO     |                      | Atmer 163 secondary amine C13                                                                                                          |
| 244,073563  | C14H12O4     | 131-53-3             | 2,2'-Dihydroxy-4-methoxybenzophenone                                                                                                   |
| 244,087952  | C9H21O4V     | 5588-84-1            | Oxotris(propan-2-olato)vanadium                                                                                                        |
| 244,1211778 | C14H16N2O2   |                      | o-dianisidine                                                                                                                          |
| 244,168793  | C14H20N4     | 25551-14-8           | Azobis(cyclohexanecarbonitrile)                                                                                                        |
| 244,2154577 | C15D16O2     |                      | BPA-d <sub>16</sub>                                                                                                                    |
| 245,996429  | C7H11KO5S    | 31098-21-2           | Methacrylic acid, sulphopropyl ester                                                                                                   |
| 246,052826  | C13H10O5     | 131-55-5             | bis(2,4-dihydroxyphenyl)methanone                                                                                                      |
| 246,089203  | C14H14O4     | 131-17-9             | Phthalic acid, diallyl ester                                                                                                           |
| 246,089234  | C14H14O4     |                      | Diallyl phthalate                                                                                                                      |
| 246,146729  | C12H22O5     | 12262-58-7           | Cyclohexanone, peroxide                                                                                                                |
| 248,0896    | C10H16O7     | 32074-56-9           | Citric acid, diethyl ester                                                                                                             |
| 248,108002  | C10H20O5Si   | 2530-85-0            | Methacrylic acid, 3-(trimethoxysilyl)propyl ester                                                                                      |
| 248,141251  | C15H20O3     | 65983-31-5           | 2-(Tricyclo[5.2.1.02,6]dec-3-en-8-yloxy)ethyl acrylate                                                                                 |
| 248,17763   | C16H24O2     |                      | 3,5-di-tert-butyl-4-hydroxyacetophenone                                                                                                |
| 249,111343  | C12H15N3O3   | 101-37-1             | Cyanuric acid triallyl ester                                                                                                           |
| 249,111343  | C12H15N3O3   | 1025-15-6            | Triallyl isocyanurate                                                                                                                  |
| 250,03      | C12H10O4S    |                      | Bisphenol S                                                                                                                            |
| 250,037964  | C8H18OSn     | 818-08-6             | Dibutyltin oxide                                                                                                                       |
| 250,074234  | C15H10N2O2   | 101-68-8             | Diphenylmethane-4,4'-diisocyanate                                                                                                      |
| 250,074234  | C15H10N2O2   | 5873-54-1            | Diphenylmethane-2,4'-diisocyanate                                                                                                      |
| 250,074997  | C9H16Cl2N4   | 4080-31-3            | 1-(3-Chloroallyl)-3,5,7-triaza-1-azoniaadamantane chloride                                                                             |
| 250,1205341 | C14H18O4     |                      | Diisopropyl phthalate                                                                                                                  |
| 250,142975  | C12H18N4O2   | 80584-89-0           | Ethanol, 2,2'-[[[(4-methyl-1H-benzotriazol-1-yl)methyl]imino]bis-                                                                      |
| 250,142975  | C12H18N4O2   | 88477-37-6           | Ethanol, 2,2'-[[[(methyl-1H-benzotriazol-1-yl)methyl]imino]bis-                                                                        |
| 250,156891  | C15H22O3     | 5153-25-3            | 2-Ethylhexyl 4-Hydroxybenzoate                                                                                                         |
| 250,1568946 | C15H22O3     |                      | 3-methyl-5-tert-butyl-4-hydroxyphenyl methylpropanoate                                                                                 |
| 250,1932801 | C16H26O2     |                      | Triton X-45 n=1                                                                                                                        |
| 250,193283  | C16H26O2     | 79-74-3              | 2,5-Di-tert-pentylhydroquinone                                                                                                         |
| 251,059204  | C10H14NNaO3S | 70916-35-7           | Benzenesulfonic acid, 4-(diethylamino)-, sodium salt                                                                                   |
| 251,059204  | C10H14NNaO3S | 5123-63-7            | Metanilic acid, N,N-diethyl-, sodium salt                                                                                              |
| 251,061615  | C12H12NO3S   | 24057-28-1           | Pyridinium p-toluenesulfonate                                                                                                          |
| 251,1680904 | C12H27O3S    |                      | Atmer 191 sulphonic acid C12                                                                                                           |
| 252,006866  | C4H13O8PS    | 55566-30-8           | Tetrakis(hydroxymethyl)phosponium sulfate                                                                                              |
| 252,0221038 | C12H10N2Cl2  |                      | 3,3'-dichlorobenzidine                                                                                                                 |
| 252,02211   | C12H10Cl2N2  | 612-83-9             | 3,3'-Dichlorobenzidine                                                                                                                 |
| 253,157898  | C16H19N3     | 2481-94-9            | Solvent Yellow 56                                                                                                                      |
| 254,006271  | C10H6O8      | 89-05-4              | Pyromellitic acid                                                                                                                      |
| 254,076538  | C16H14O5     | 83846-86-0           | 4-Isopropyl thioxanthone                                                                                                               |
| 254,076538  | C16H14O5     | 5495-84-1            | 2-Isopropyl thioxanthone                                                                                                               |
| 254,0765608 | C16H14O5     |                      | 2-Isopropylthioxanthone                                                                                                                |
| 254,0765608 | C16H14O5     |                      | 4-Isopropylthioxanthone                                                                                                                |
| 254,130676  | C17H18O2     | 182121-12-6          | 9,9-Bis(methoxymethyl)fluorene                                                                                                         |
| 254,136551  | C10H22O7     | 126-58-9             | Dipentaerythritol                                                                                                                      |
| 254,224579  | C16H30O2     | 3076-04-8            | Acrylic acid, tridecyl ester                                                                                                           |
| 254,224579  | C16H30O2     | 373-49-9             | Palmitoleic acid                                                                                                                       |
| 255,920914  | C4H6N2Na2S4  | 142-59-6             | Nabam                                                                                                                                  |
| 256,1099694 | C16H16O3     |                      | 2,2-Dimethoxy-2-phenylacetophenone                                                                                                     |
| 256,16745   | C14H24O4     | 14228-73-0           | Cyclohexane, 1,4-bis[(2,3-epoxypropoxy)methyl]-                                                                                        |
| 256,16745   | C14H24O4     | 25134-51-4           | Acrylic acid, acrylic acid 2-ethylhexyl ester, copolymer                                                                               |
| 256,2402303 | C16H32O2     |                      | palmitic acid                                                                                                                          |
| 256,2402303 | C16H32O2     |                      | palmitic acid                                                                                                                          |
| 256,2402303 | C16H32O2     |                      | hexadecanoic acid, palmitic acid                                                                                                       |
| 256,240234  | C16H32O2     | 57-10-3              | Palmitic acid                                                                                                                          |
| 256,9691584 | C12H8Cl3     |                      | PCB 3                                                                                                                                  |
| 257,2718648 | C16H35NO     |                      | Atmer 163 secondary amine C14                                                                                                          |
| 258,104462  | C19H14O      | 2128-93-0            | 4-Benzoylbiphenyl                                                                                                                      |
| 258,1044901 | C19H14O      |                      | 4-Phenylbenzophenone                                                                                                                   |
| 258,110352  | C12H18O6     | 1680-21-3            | Acrylic acid, diester with triethyleneglycol                                                                                           |
| 258,1831    | C14H26O4     |                      | Di-n-butyl adipate                                                                                                                     |
| 258,1831    | C14H26O4     |                      | Di-iso-butyl adipate                                                                                                                   |
| 258,183105  | C14H26O4     | 105-99-7             | Adipic acid, dibutyl ester                                                                                                             |

|             |              |            |                                                                                                                                              |
|-------------|--------------|------------|----------------------------------------------------------------------------------------------------------------------------------------------|
| 258,183105  | C14H26O4     | 109-43-3   | Sebacic acid, dibutyl ester                                                                                                                  |
| 258,183105  | C14H26O4     | 141-04-8   | Adipic acid, diisobutyl ester                                                                                                                |
| 258,219482  | C15H30O3     | 27194-74-7 | 1,2-Propyleneglycol monolaurate                                                                                                              |
| 260,024017  | C14H9ClO3    | 85-56-3    | 2-(4-Chlorobenzoyl)benzoic acid                                                                                                              |
| 260,1058549 | C10H21O4SNa  |            | Atmer 191 C10                                                                                                                                |
| 260,125977  | C12H20O6     | 13236-02-7 | Propane, 1,2,3-tris(2,3-epoxypropoxy)-                                                                                                       |
| 260,198761  | C14H28O4     | 3006-86-8  | 1,1-Bis(tert-butylperoxy)cyclohexane                                                                                                         |
| 261,0961    | C9H15N3O6    | 839-90-7   | 1,3,5-Tris(2-Hydroxyethyl)-1,3,5-triazine-2,4,6(1H,3H,5H)-trione                                                                             |
| 262,066467  | C8H15NaO8    | 9004-32-4  | Carboxymethyl cellulose, sodium salt                                                                                                         |
|             |              |            | Tetrahydro-1,3,4,6-tetrakis-(hydroxymethyl)-imidazo(4,5-d)imidazole-2,5(1H,3H)-dione as formaldehyde donator system with an average ratio of |
| 262,091339  | C8H14N4O6    | 5395-50-6  | formaldehyde: acetylene diurea of 3.1:1 to 3.5:1                                                                                             |
| 262,091339  | C8H14N4O6    | 5395-50-6  | Tetrakis(hydroxymethyl)glycoluril                                                                                                            |
| 262,168121  | C15H22N2O2   | 5124-30-1  | Dicyclohexylmethane-4,4'-diisocyanate                                                                                                        |
| 262,1721507 | C20H22       |            | butadiene n=9                                                                                                                                |
| 262,229675  | C18H30O      | 17540-75-9 | 4-sec-Butyl-2,6-di-tert-butylphenol                                                                                                          |
| 262,229675  | C18H30O      | 27193-86-8 | 4-dodecylphenol                                                                                                                              |
| 262,229675  | C18H30O      | 28471-16-1 | 2,3,4-Tributylphenol                                                                                                                         |
| 262,229675  | C18H30O      | 5857-00-1  | 2,4,6-Tributylphenol                                                                                                                         |
| 262,229675  | C18H30O      | 5892-47-7  | Phenol, 2,4,6-tris(1-methylpropyl)-                                                                                                          |
| 262,229675  | C18H30O      | 732-26-3   | Phenol, 2,4,6-tri-tert-butyl-                                                                                                                |
| 263,224915  | C17H29NO     | 88-27-7    | p-Cresol, 2,6-di-tert-butyl-.alpha.-(dimethylamino)-                                                                                         |
| 263,8470282 | C6HOCl5      |            | Pentachlorophenol                                                                                                                            |
| 263,889771  | C6H6Br2N2    | 35691-65-7 | 1,2-Dibromo-2,4-dicyanobutane                                                                                                                |
| 263,9833    | C5HO2F9      |            | PFPA                                                                                                                                         |
| 264,0197    | C6H5OF9      |            | 4:2 FTOH                                                                                                                                     |
| 264,063385  | C13H12O6     | 30697-40-6 | Phthalic acid, mono(2-hydroxyethyl) ester, acrylate                                                                                          |
| 264,089874  | C16H12N2O2   | 91-97-4    | 3,3'-Dimethyl-4,4'-diisocyanatobiphenyl                                                                                                      |
| 264,124084  | C11H21ClN2O3 | 69418-26-4 | Copolymer of acrylamide and 2-(N,N,N-Trimethylammonium)ethylacrylate, chloride                                                               |
| 264,136169  | C15H20O4     | 80-05-7    | 2,2-Bis(4-hydroxyphenyl)propane                                                                                                              |
| 265,1552176 | C14H21N2O3   |            | Nylon MXD6 n=1                                                                                                                               |
| 265,167786  | C15H23NO3    | 67362-76-9 | Benzoic acid, 4-(dimethylamino)-, 2-butoxyethyl ester                                                                                        |
| 265,1837405 | C13H29O3S    |            | Atmer 191 sulphonic acid C13                                                                                                                 |
| 266,0377538 | C13H12N2Cl2  |            | 4,4'-methylene-bis-(2-chloroaniline)                                                                                                         |
| 266,063782  | C9H14O9      | 36291-32-4 | Citric acid, monoester with glycerol                                                                                                         |
| 266,079041  | C13H14O6     | 85-71-2    | Phthalic acid, mixed esters with ethyl glycolate and methanol                                                                                |
| 266,094299  | C17H14O3     | 70331-94-1 | 2,2'-Oxamidobis[ethyl-3-(3,5-di-tert-butyl-4-hydroxyphenyl)propionate]                                                                       |
| 266,130676  | C18H18O2     | 68818-86-0 | Anthracene, 9,10-diethoxy-                                                                                                                   |
| 266,164703  | C12H27O4P    | 126-71-6   | Phosphoric acid, triisobutyl ester                                                                                                           |
| 266,164703  | C12H27O4P    | 126-73-8   | Phosphoric acid, tributyl ester                                                                                                              |
| 267,965363  | C8H5NaO7S    | 6362-79-4  | 5-Sulphoisophthalic acid, salts                                                                                                              |
| 268,005798  | C13H10Cl2O2  | 97-23-4    | 2,2'-Dihydroxy-5,5'-dichlorodiphenylmethane                                                                                                  |
| 268,0922109 | C17H16O5     |            | 2,4-Diethyl-9H-thioxanthen-9-one                                                                                                             |
| 268,157562  | C17H20N2O    | 85-98-3    | Diethyldiphenylurea                                                                                                                          |
| 268,1575883 | C17H20N2O    |            | 4,4'-bis(dimethylamino)benzophenone                                                                                                          |
| 268,240234  | C17H32O2     | 21643-42-5 | Acrylic acid, tetradecyl ester                                                                                                               |
| 268,276611  | C18H36O      | 143-28-2   | Oleyl alcohol                                                                                                                                |
| 269,093292  | C9H19NO6S    | 13106-44-0 | Choline, methyl sulfate, acrylate                                                                                                            |
| 269,115997  | C15H15N3O2   | 2832-40-8  | Disperse Yellow 3                                                                                                                            |
| 269,118256  | C14H20ClNO2  | 46830-22-2 | Dimethyl(acryloyloxyethyl)benzylammonium chloride                                                                                            |
| 269,308258  | C18H39N      | 124-30-1   | Octadecylamine                                                                                                                               |
| 269,987671  | C8H14O2S4    | 105-65-7   | Bis(isopropyl) thioperoxydicarbonate                                                                                                         |
| 270,014069  | C7H11O9P     | 37971-36-1 | 2-Phosphonobutane-1,2,4-tricarboxylic acid                                                                                                   |
| 270,089203  | C16H14O4     | 3034-79-5  | Bis(o-toluoyl) peroxide                                                                                                                      |
| 270,0892089 | C16H14O4     |            | ethylene dibenzoate                                                                                                                          |
| 270,110352  | C13H18O6     | 57043-35-3 | 1,2-Cyclohexanedicarboxylic acid, mono[2-[(1-oxo-                                                                                            |
| 270,12558   | C17H18O3     | 87-18-3    | Salicylic acid, 4-tert-butylphenyl ester                                                                                                     |
| 270,1384811 | C14H23O3P    |            | 2,4-di-tert-butylphenylphosphate                                                                                                             |
| 270,161987  | C18H22O2     | 80-43-3    | Dicumyl peroxide                                                                                                                             |
| 270,2922658 | C18H38O      |            | octadecanol, stearyl alcohol                                                                                                                 |
| 270,292267  | C18H38O      | 112-92-5   | 1-Octadecanol                                                                                                                                |
| 271,2875148 | C17H37NO     |            | Atmer 163 secondary amine C15                                                                                                                |
| 272,142212  | C12H25NaO3S  | 1510-16-3  | Dodecane-1-sulphonic acid                                                                                                                    |
| 273,062683  | C8H12N5O4P   | 1071-93-8  | Adipic acid, dihydrazide                                                                                                                     |
| 273,078979  | C18H11NO2    | 8003-22-3  | Solvent Yellow 33                                                                                                                            |
| 274,084137  | C15H14O5     | 131-54-4   | Benzophenone, 2,2'-dihydroxy-4,4'-dimethoxy-                                                                                                 |
| 274,1215049 | C11H23O4SNa  |            | Atmer 191 C11                                                                                                                                |
| 274,214417  | C15H30O4     | 27215-38-9 | Glycerol monolaurate                                                                                                                         |
| 275,1647196 | C17H23O3     |            | octadecanol - corres acid 2                                                                                                                  |
| 276,006989  | C8H13KO6S    | 93841-08-8 | Acrylic acid, 2-(3-sulfopropoxy)ethyl ester, potassium salt                                                                                  |
| 276,110992  | C14H16N2O4   | 24731-73-5 | Butanamide, N,N'-1,4-phenylenebis[3-oxo-                                                                                                     |
| 276,120911  | C12H20O7     | 77-93-0    | Citric acid, triethyl ester                                                                                                                  |
| 276,1725446 | C17H24O3     |            | quinone methide,                                                                                                                             |
| 277,110291  | C18H15NO2    | 5232-99-5  | 2-Cyano-3,3-diphenylacrylic acid, ethyl ester                                                                                                |
| 277,131409  | C15H19NO4    | 5026-74-4  | 2-Oxiranemethanamine, N-[4-(oxiranylmethoxy)phenyl]-N-(oxiranylmethyl)-                                                                      |
|             |              |            | Mixture of :                                                                                                                                 |
|             |              |            | Phenoxyethylacrylate                                                                                                                         |
|             |              |            | Methyl-2-benzoylbenzoate                                                                                                                     |
| 277,131409  | C15H19NO4    | 48145-04-6 | 2-Benzyl-2-(dimethylamino)-4-morpholino butyrophenone                                                                                        |
| 277,204193  | C17H27NO2    | 21245-02-3 | Ethyl-4-Dimethylaminobenzoate                                                                                                                |
| 277,2042041 | C17H27NO2    |            | 2-Ethylhexyl 4-(dimethylamino)benzoate                                                                                                       |
| 278,079041  | C14H14O6     | 27697-00-3 | 2-Ethylhexyl-4-(dimethylamino)benzoate                                                                                                       |
| 278,139709  | C12H23ClN2O3 | 35429-19-7 | 1,2-Benzenedicarboxylic acid, mono[2-[(2-methyl-1-oxo-2-propenyl)oxy]ethyl] ester                                                            |
| 278,151794  | C16H22O4     | 84-74-2    | Acrylamide-N,N,N-trimethylaminoethyl methacrylate chloride, copolymer                                                                        |
| 278,151794  | C16H22O4     | 1962-75-0  | Phthalic acid, dibutyl ester                                                                                                                 |
| 278,151794  | C16H22O4     | 84-69-5    | Terephthalic acid, dibutyl ester                                                                                                             |
| 278,1518342 | C16H22O4     |            | Phthalic acid, diisobutyl ester                                                                                                              |
| 278,1518342 | C16H22O4     |            | Diisobutyl phthalate                                                                                                                         |
| 278,1518342 | C16H22O4     |            | Di-n-butyl phthalate                                                                                                                         |
| 278,1518342 | C16H22O4     |            | Diisobutyl phthalate                                                                                                                         |
| 278,1518342 | C16H22O4     |            | Di-n-butyl phthalate                                                                                                                         |
| 278,1881947 | C17H26O3     |            | octadecanol - corres acid 1                                                                                                                  |
| 278,1881947 | C17H26O3     |            | 3-(3,5-di-tert-butyl-4-hydroxyphenyl)propionic acid                                                                                          |
| 278,224579  | C18H30O2     | 28290-79-1 | Linolenic acid                                                                                                                               |
| 279,1293246 | C15H21NO2S   |            | 2-Methyl-4'-(methylthio)-2-morpholinopropiophenone                                                                                           |
| 279,1596342 | C16H23O4     |            | MEHP                                                                                                                                         |
| 279,1993906 | C14H31O3S    |            | Atmer 191 sulphonic acid C14                                                                                                                 |
| 280,094696  | C14H16O6     | 84-72-0    | Phthalic acid, mixed esters with ethyl glycolate and ethanol                                                                                 |
| 280,240234  | C18H32O2     | 60-33-3    | Linoleic acid                                                                                                                                |
| 280,991272  | C8H12INO2    | 55406-53-6 | 3-Iodo-2-propynyl butyl carbamate                                                                                                            |
| 281,0408    | C11H17Cl2NOS | 64359-81-5 | 4,5-Dichloro-2-octyl-4-isothiazolin-3-one                                                                                                    |
| 281,040802  | C11H17Cl2NOS | 64359-81-5 | 3(2H)-isothiazolone, 4,5-dichloro-2-octyl-                                                                                                   |
| 281,271851  | C18H35NO     | 301-02-0   | Oleamide                                                                                                                                     |
| 281,2718648 | C18H35NO     |            | Atmer SA 1758                                                                                                                                |
| 281,2718898 | C18H35NO     |            | (9Z)-9-Octadecenamide                                                                                                                        |
| 282,0210819 | C12H12O4P2   |            | Irgafos P-EPQ hydrolysis product                                                                                                             |
| 282,110352  | C14H18O6     | 117-82-8   | Phthalic acid, bis(2-methoxyethyl) ester                                                                                                     |
| 282,136841  | C17H18N2O2   | 57834-33-0 | Benzoic acid, 4-[[[(methylphenylamino)methylene]amino]-, ethyl ester                                                                         |
| 282,146729  | C15H22O5     | 1034-01-1  | Gallic acid, octyl ester                                                                                                                     |
| 282,183105  | C16H26O4     | 13048-34-5 | Acrylic acid, decamethylene ester                                                                                                            |
| 282,2558803 | C18H34O2     |            | Oleic acid                                                                                                                                   |
| 282,25589   | C18H34O2     | 26764-26-1 | Octadecenoic acid                                                                                                                            |
| 282,25589   | C18H34O2     | 112-79-8   | Elaidic acid                                                                                                                                 |
| 282,25589   | C18H34O2     | 112-80-1   | Oleic acid                                                                                                                                   |
| 282,997284  | C11H9NO4S2   | 95154-01-1 | Butanedioic acid, (2-benzothiazolylthio)-                                                                                                    |
| 283,011993  | C8H15CeO2    | 7435-02-1  | Caprylic acid, cerium salt                                                                                                                   |
| 283,108948  | C10H21NO6S   | 88992-91-0 | 1-Propanaminium, N,N-dimethyl-N-[2-[(1-oxo-2-propenyl)oxy]ethyl]-3-sulfo-, hydroxide, inner salt                                             |
| 283,264252  | C18H35O2     | 26836-47-5 | Sorbitol monostearate                                                                                                                        |

|             |              |            |                                                                                                     |
|-------------|--------------|------------|-----------------------------------------------------------------------------------------------------|
| 283,287506  | C18H37NO     | 124-26-5   | Stearamide                                                                                          |
| 283,2875148 | C18H37NO     |            | octadecanamide                                                                                      |
| 283,953888  | C6H12Cl3O4P  | 115-96-8   | Phosphoric acid, trichloroethyl ester                                                               |
| 284,060425  | C6H12N4O9    | 1302-78-9  | Bentonite                                                                                           |
| 284,1541312 | C15H25O3P    |            | (nonylphenyl)phosphite                                                                              |
| 284,271515  | C18H36O2     | 57-11-4    | Stearic acid                                                                                        |
| 284,2715304 | C18H36O2     |            | stearic acid, octadecanoic acid                                                                     |
| 284,282776  | C17H36N2O    | 4559-86-8  | Urea, tetrabutyl-                                                                                   |
| 284,282776  | C17H36N2O    | 4635-59-0  | Butyryl chloride, 4-chloro-                                                                         |
| 285,1940084 | C15H27NO4    |            | Tinuvin 622 n=1                                                                                     |
| 286,073517  | C9H20O6P2    | 41203-81-0 | Trimethylolpropane cyclic methylphosphonate (1:1) methyl methylphosphonate                          |
| 286,120514  | C17H18O4     | 126-00-1   | Diphenolic acid                                                                                     |
| 286,134888  | C12H27O4V    | 1801-76-9  | Tributoxyoxovanadium                                                                                |
| 286,141632  | C14H22O6     | 1561-49-5  | Dicyclohexyl peroxydicarbonate                                                                      |
| 286,214417  | C16H30O4     | 6846-50-0  | 2,2,4-Trimethyl-1,3-pentanediol diisobutyrate                                                       |
| 286,2144345 | C16H30O4     |            | 2,2,4-trimethyl-1,3-pentanediol diisobutyrate                                                       |
| 287,246033  | C16H33NO3    | 120-40-1   | N,N-Bis(2-hydroxyethyl)lauramide                                                                    |
| 287,2824294 | C17H37NO2    |            | Atmer 163 C13                                                                                       |
| 287,951172  | C12H7Cl3O2   | 3380-34-5  | 2,4,4'-Trichloro-2'-hydroxydiphenyl ether                                                           |
| 288,11438   | C12H20N2O4S  | 13560-49-1 | 3-Aminocrotonic acid, diester with thiobis(2-hydroxyethyl) ether                                    |
| 288,137115  | C12H25NaO4S  | 151-21-3   | Dodecylsulphuric acid, sodium salt                                                                  |
| 288,137155  | C12H25O4SNa  |            | Atmer 191 C12                                                                                       |
| 288,1878008 | C22H24       |            | butadiene n=10                                                                                      |
| 290,06842   | C8H20O7P2    | 7722-88-5  | Tetrasodium pyrophosphate                                                                           |
| 290,06842   | C8H20O7P2    | 112-57-2   | Tetraethylenepentamine                                                                              |
| 290,1001676 | C12H18O8     |            | acetyl butyl citrate                                                                                |
| 290,1881947 | C18H26O3     |            | 2-ethylhexyl-p-methoxycinnamate                                                                     |
| 290,1881947 | C18H26O3     |            | quinone methide methyl ester                                                                        |
| 290,188202  | C18H26O3     | 5466-77-3  | Acrylic acid, 3-(4-methoxyphenyl)-, 2-ethylhexyl ester                                              |
| 290,260956  | C20H34O      | 26266-77-3 | Hydroabietyl alcohol                                                                                |
| 290,9301861 | C12H7Cl4     |            | PCB 4                                                                                               |
| 291,011963  | C11H10BrN5   | 8002-09-3  | Pine oil                                                                                            |
| 291,158295  | C15H21N3O3   | 6291-95-8  | Trimethallyl isocyanurate                                                                           |
| 292,090668  | C10H16N2O8   | 60-00-4    | Ethylenediaminetetraacetic acid (EDTA)                                                              |
| 292,2038448 | C18H28O3     |            | methyl-3-(3,5-di-tert-butyl-4-hydroxyphenyl)propionate                                              |
| 292,236206  | C14H32N2O4   | 102-60-3   | N,N,N',N',-Tetrakis(2-hydroxypropyl)ethylenediamine                                                 |
| 293,2150406 | C15H33O3S    |            | Atmer 191 sulphonic acid C15                                                                        |
| 294,2194948 | C18H30O3     |            | Triton X-45 n=2                                                                                     |
| 294,902832  | C9H4Cl3NO2S  | 133-07-3   | Folpet (Phthalimide, N-[(trichloromethyl)thio]-)                                                    |
| 295,287506  | C19H37NO     | 112-96-9   | Octadecyl isocyanate                                                                                |
| 296,050934  | C10H20N2S4   | 97-77-8    | Tetraethylthiuram disulphide                                                                        |
| 296,125977  | C15H20O6     | 15625-89-5 | Trimethylolpropane triacrylate                                                                      |
| 296,1259884 | C15H20O6     |            | 3,4-dimethylbenzylidene sorbitol                                                                    |
| 296,152466  | C18H20N2O2   | 65816-20-8 | Benzoic acid, 4-[[[ethylphenylamino)methylene]amino]-, ethyl ester                                  |
| 296,21402   | C21H28O      | 68610-51-5 | p-Cresol-dicyclopentadiene-isobutylene, copolymer                                                   |
| 296,271515  | C19H36O2     | 13402-02-3 | Acrylic acid, hexadecyl ester                                                                       |
| 296,2715304 | C19H36O2     |            | methyl oleate                                                                                       |
| 297,0961    | C12H15N3O6   | 2451-62-9  | Tris(2,3-epoxypropyl)isocyanurate (Teroxirone)                                                      |
| 297,1940084 | C16H27NO4    |            | methyl-1-aza-2,2,6,6-tetramethyl-3-cyclohexeneethyl succinate                                       |
| 297,24353   | C18H33O3     | 29894-35-7 | Polyglycerol ricinoleate                                                                            |
| 298,018951  | C10H18O2S4   | 105-77-1   | Dibutylxanthogen disulphide                                                                         |
| 298,105255  | C14H18O7     | 3524-68-3  | Pentaerythritol triacrylate                                                                         |
| 298,156891  | C19H22O3     | 3293-97-8  | 2-Hydroxy-4-n-hexyloxybenzophenone                                                                  |
| 298,1602904 | C16H26O3S    |            | Mesamoll mono SO3 C10                                                                               |
| 298,193268  | C20H26O2     | 33145-10-7 | 2,4-Xylenol, 6,6'-isobutylidenedi-                                                                  |
| 298,2872055 | C19H38O2     |            | Methyl stearate                                                                                     |
| 298,4608    | C18H34O3     | 141-22-0   | Ricinoleic acid                                                                                     |
| 299,9503    | C4HO3F9S     |            | PFBS                                                                                                |
| 300,1490458 | C15H25O4P    |            | (nonylphenyl)phosphate                                                                              |
| 300,157288  | C15H24O6     | 42978-66-5 | Acrylic acid,(1-methyl-1,2-ethanediyl)bis[oxy(methyl-2,1-ethanediyl)] ester                         |
| 300,208923  | C20H28O2     | 1740-19-8  | Dehydroabietic acid                                                                                 |
| 300,2089552 | C20H28O2     |            | Dehydroabietic acid                                                                                 |
| 300,2219934 | C18H33OCl    |            | oleyl chloride                                                                                      |
| 300,266449  | C18H36O3     | 106-14-9   | 12-Hydroxystearic acid                                                                              |
| 301,2980795 | C18H39NO2    |            | Atmer 163 C14                                                                                       |
| 302,136566  | C14H22O7     | 17831-71-9 | Acrylic acid, diester with tetraethyleneglycol                                                      |
| 302,152805  | C13H27O4SNa  |            | Atmer 191 C13                                                                                       |
| 302,167053  | C22H22O      | 25640-70-4 | Phenol, bis(1-phenylethyl)-                                                                         |
| 302,167053  | C22H22O      | 2769-94-0  | 2,4-Bis(1-phenylethyl)phenol                                                                        |
| 302,172943  | C15H26O6     | 60-01-5    | Glycerol tributryate                                                                                |
| 302,172943  | C15H26O6     | 30499-70-8 | 1,3-Propanediol, 2-ethyl-2-(hydroxymethyl)-, polymer with (chloromethyl)oxirane                     |
| 302,224579  | C20H30O2     | 8050-09-7  | Rosin                                                                                               |
| 302,224579  | C20H30O2     | 514-10-3   | Abietic acid                                                                                        |
| 302,2246052 | C20H30O2     |            | Abietic acid                                                                                        |
| 302,245697  | C17H34O4     | 27214-38-6 | Glycerol monomyristate                                                                              |
| 302,282104  | C18H38O3     | 61725-89-1 | Poly(ethylene propylene)glycol tridecyl ether                                                       |
| 303,91748   | C6H12N2S4Zn  | 137-30-4   | Dimethyldithiocarbamic acid, zinc salt                                                              |
| 304,034027  | C14H12N2O2S2 | 2527-57-3  | 2,2'-Dithiobisbenzamide                                                                             |
| 304,092194  | C20H16O5     | 83846-85-9 | 4-(p-Tolylthio)benzophenone                                                                         |
| 304,0922109 | C20H16O5     |            | 4-(4-Methylphenylthio)benzophenone                                                                  |
| 304,166992  | C18H24O4     | 42594-17-2 | Dicyclopentadienedimethanol diacrylate                                                              |
| 304,240234  | C20H32O2     | 7771-44-0  | Arachidonic acid                                                                                    |
| 304,276611  | C21H36O      | 501-24-6   | Hydroginkgol                                                                                        |
| 306,1831344 | C18H26O4     |            | Di-n-pentyl phthalate                                                                               |
| 306,232391  | C16H35O3P    | 3658-48-8  | Phosphonic acid, bis(2-ethylhexyl) ester                                                            |
| 306,25589   | C20H34O2     | 9014-92-0  | Polyethyleneglycol dodecylphenyl ether                                                              |
| 307,2306907 | C16H35O3S    |            | Atmer 191 sulphonic acid C16                                                                        |
| 308,035461  | C14H12O6S    | 4065-45-6  | 2-Hydroxy-4-Methoxy-5-sulfonylbenzophenone(BP-4)                                                    |
| 308,235138  | C19H32O3     | 9016-45-9  | Polyethyleneglycol nonylphenyl ether                                                                |
| 308,235138  | C19H32O3     | 26027-38-3 | Polyethyleneglycol 4-nonylphenyl ether                                                              |
| 309,303162  | C20H39NO     | 10436-08-5 | cis-11-Eicosenamide                                                                                 |
| 310,156891  | C20H22O3     | 70356-09-1 | 1,3-Propanedione, 1-[4-(1,1-dimethylethyl)phenyl]-3-(4-methoxyphenyl)-                              |
| 310,162781  | C13H26O8     | 13122-18-4 | tert-Butyl 3,5,5-trimethylperoxyhexanoate                                                           |
| 310,28717   | C20H38O2     | 29204-02-2 | Gadoleic acid                                                                                       |
| 312,1361591 | C19H20O4     |            | BFDGE                                                                                               |
| 312,136169  | C19H20O4     | 39817-09-9 | Bisphenol F diglycidyl ether                                                                        |
| 312,136169  | C19H20O4     | 54208-63-8 | Bis(2-hydroxyphenyl)methane bis(2,3-epoxypropyl) ether                                              |
| 312,136169  | C19H20O4     | 2095-03-6  | Oxirane, 2,2'-[methylenebis(4,1-phenyleneoxymethylene)]bis-                                         |
| 312,136169  | C19H20O4     | 85-68-7    | Phthalic acid, benzyl butyl ester                                                                   |
| 312,1361842 | C19H20O4     |            | Butyl benzyl phthalate                                                                              |
| 312,1361842 | C19H20O4     |            | Benzyl butyl phthalate                                                                              |
| 312,1474    | C18H20N2O3   | 23949-66-8 | 2-Ethoxy-2'-ethyloxanilide                                                                          |
| 312,157288  | C16H24O6     | 30145-51-8 | Acrylic acid *3-[2,2-dimethyl-1-oxo-3-[(1-oxo-2-propenyl)oxy]propoxy]-2,2-dimethylpropyl ester      |
| 312,1759405 | C17H28O3S    |            | Mesamoll mono SO3 C11                                                                               |
| 312,302826  | C20H40O2     | 506-30-9   | Arachidic acid                                                                                      |
| 312,302826  | C20H40O2     | 822-23-1   | Octadecyl acetate                                                                                   |
| 312,3028305 | C20H40O2     |            | ethylstearate                                                                                       |
| 313,1956258 | C24H25       |            | styrene trimer                                                                                      |
| 313,225311  | C17H31NO4    | 65447-77-0 | 1-(2-Hydroxyethyl)-4-hydroxy-2,2,6,6-tetramethyl piperidine-succinic acid, dimethylester, copolymer |
| 313,9801    | C6HO2F11     |            | PFHxA                                                                                               |
| 314,072601  | C10H15N2NaO8 | 7379-28-4  | Ethylenediaminetetraacetic acid, sodium salt                                                        |
| 314,095245  | C16H19NaO3S  | 1322-93-6  | Naphthalenesulfonic acid, diisopropyl-, sodium salt                                                 |
| 314,1154    | C18H18O5     |            | Diethylene glycol benzoate                                                                          |
| 314,2034508 | C24H26       |            | butadiene n=11                                                                                      |
| 314,245697  | C18H34O4     | 3851-87-4  | Bis(3,5,5-trimethylhexanoyl) peroxide                                                               |
| 314,2457346 | C18H34O4     |            | Di-n-butyl sebacate                                                                                 |
| 314,282104  | C19H38O3     | 29013-28-3 | 1,2-Propyleneglycol monopalmitate                                                                   |

|             |               |             |                                                                                                                                                                                                                                                       |
|-------------|---------------|-------------|-------------------------------------------------------------------------------------------------------------------------------------------------------------------------------------------------------------------------------------------------------|
| 315,113831  | C17H18ClN3O   | 3896-11-5   | 2-(2'-Hydroxy-3'-tert-butyl-5'-methylphenyl)-5-chlorobenzotriazole (JC 30S)                                                                                                                                                                           |
| 315,3137296 | C19H41NO2     |             | Atmer 163 C15                                                                                                                                                                                                                                         |
| 316,055786  | C20H12O2S     | 13354-35-3  | 9,10-Anthracenedione, 1-(phenylthio)-                                                                                                                                                                                                                 |
| 316,121185  | C20H16N2O2    | 2478-20-8   | Solvent Yellow 44                                                                                                                                                                                                                                     |
| 316,16745   | C19H24O4      | 901-44-0    | 2,2-Bis(4-hydroxyphenyl)propane-bis(2-hydroxyethyl) ether                                                                                                                                                                                             |
| 316,1684551 | C14H29O4SNa   |             | Atmer 191 C14                                                                                                                                                                                                                                         |
| 316,1886    | C16H28O6      |             | Diacteyl lauroyl glycerol                                                                                                                                                                                                                             |
| 317,2929941 | C18H39NO3     |             | dihydroxy oleamide                                                                                                                                                                                                                                    |
| 318,089203  | C20H14O4      | 84-62-8     | Phthalic acid, diphenyl ester                                                                                                                                                                                                                         |
| 318,13147   | C14H22O8      | 77-89-4     | Triethyl acetylcitrate (Citroflex A2)                                                                                                                                                                                                                 |
| 319,3239003 | C22H41N       |             | erucyl nitrile                                                                                                                                                                                                                                        |
| 320,11792   | C18H21ClO3    | 25068-38-6  | 2,2-Bis(4-hydroxyphenyl)propane-epichlorohydrin copolymer                                                                                                                                                                                             |
| 321,2463407 | C17H37O3S     |             | Atmer 191 sulphonic acid C17                                                                                                                                                                                                                          |
| 321,3004848 | C18H41O4      |             | dihydroxy oleic acid                                                                                                                                                                                                                                  |
| 322,011353  | C17H6O7       | 2421-28-5   | Phthalic anhydride, 4,4-carbonyl-di                                                                                                                                                                                                                   |
| 322,012329  | C11H12Cl2N2O5 | 2832-19-1   | Acetamide, 2-chloro-N-(hydroxymethyl)- (Chloramphenicol)                                                                                                                                                                                              |
| 322,227295  | C16H35O4P     | 298-07-7    | Phosphoric acid, bis(2-ethylhexyl) ester                                                                                                                                                                                                              |
| 323,051849  | C9H14N3O8P    | 26628-47-7  | cmp-5 (Colour Former Red 3)                                                                                                                                                                                                                           |
| 323,138214  | C17H17N5O2    | 31482-56-1  | Disperse Orange 25                                                                                                                                                                                                                                    |
| 323,236145  | C21H29N3      | 6358-36-7   | Basic Yellow 37                                                                                                                                                                                                                                       |
| 324,206573  | C15H33O5P     | 9046-01-9   | Polyethyleneglycol tridecyl ether phosphate                                                                                                                                                                                                           |
| 324,207031  | C20H26N3O     | 73570-52-2  | Phenoxazin-5-ium, 3,7-bis(diethylamino)-, nitrate                                                                                                                                                                                                     |
| 324,220154  | C21H28N2O     | 90-93-7     | 4,4'-bis(Diethylamino)benzophenone                                                                                                                                                                                                                    |
| 324,2201886 | C21H28N2O     |             | 4,4'-bis(diethylamino)benzophenone                                                                                                                                                                                                                    |
| 324,302826  | C21H40O2      | 4813-57-4   | Acrylic acid, octadecyl ester                                                                                                                                                                                                                         |
| 324,8912137 | C12H6Cl5      |             | PCB 5                                                                                                                                                                                                                                                 |
| 326,070801  | C18H15O4P     | 115-86-6    | Phosphoric acid, triphenyl ester                                                                                                                                                                                                                      |
| 326,0708205 | C18H15O4P     |             | Triphenyl phosphate                                                                                                                                                                                                                                   |
| 326,101501  | C16H14N4O4    | 4106-67-6   | Pigment Yellow 5                                                                                                                                                                                                                                      |
| 326,10553   | C21H14N2O2    | 10228-01-0  | Quino[2,3-b]acridine-7,14-dione, 5,12-dihydro-2-methyl-                                                                                                                                                                                               |
| 326,151794  | C20H22O4      | 2451-84-5   | Dibenzyl Adipate                                                                                                                                                                                                                                      |
| 326,1518    | C20H22O4      |             | Dibenzyladipate                                                                                                                                                                                                                                       |
| 326,172943  | C17H26O6      | 87320-05-6  | Acrylic acid,[2-[1,1-dimethyl-2-[(1-oxo-2-propenyl)oxy]ethyl]-5-ethyl-1,3-dioxan-5-yl]methyl ester                                                                                                                                                    |
| 326,188202  | C21H26O3      | 1843-05-6   | 2-Hydroxy-4-n-octyloxy benzophenone                                                                                                                                                                                                                   |
| 326,1882197 | C21H26O3      |             | Chimassorb 81                                                                                                                                                                                                                                         |
| 326,191559  | C18H30O3S     | 27176-87-0  | Dodecylbenzenesulphonic acid                                                                                                                                                                                                                          |
| 326,1915906 | C18H30O3S     |             | Mesamoll mono SO3 C12                                                                                                                                                                                                                                 |
| 327,207947  | C14H33NO5S    | 4722-98-9   | (2-Hydroxyethyl)ammonium dodecyl sulphate                                                                                                                                                                                                             |
| 328,142303  | C18H20N2O4    | 52821-24-6  | Basic Yellow 131                                                                                                                                                                                                                                      |
| 329,329376  | C20H43NO2     | 2190-04-7   | Octadecylammonium acetate                                                                                                                                                                                                                             |
| 330,1467238 | C19H22O5      |             | BFDGE.H <sub>2</sub> O                                                                                                                                                                                                                                |
| 330,183105  | C20H26O4      | 84-61-7     | Phthalic acid, dicyclohexyl ester                                                                                                                                                                                                                     |
| 330,1831344 | C20H26O4      |             | Dicyclohexyl phthalate                                                                                                                                                                                                                                |
| 330,1841052 | C15H31O4SNa   |             | Atmer 191 C15                                                                                                                                                                                                                                         |
| 331,084473  | C20H13NO4     | 17418-58-5  | 1-Amino-4-hydroxy-2-phenoxy-9,10-anthraquinone(Disperse Red 60)                                                                                                                                                                                       |
| 332,068481  | C20H12O5      | 2321-07-5   | Fluorescein (Solvent Yellow 94)                                                                                                                                                                                                                       |
| 333,147736  | C20H19N3O2    | 27425-55-4  | 3-(1H-benzimidazol-2-yl)-7-(diethylamino)-2H-chromen-2-one (Disperse Yellow 82)                                                                                                                                                                       |
| 334,131744  | C20H18N2O3    | 35773-42-3  | 3-(1,3-benzoxazol-2-yl)-7-(diethylamino)-2H-chromen-2-one (Disperse Yellow 232)                                                                                                                                                                       |
| 334,2144345 | C20H30O4      |             | Di-n-hexyl phthalate                                                                                                                                                                                                                                  |
| 334,235535  | C17H34O6      | 995-33-5    | 4,4-Di-tert-butylperoxy n-butylvalerate                                                                                                                                                                                                               |
| 335,2619908 | C18H39O3S     |             | Atmer 191 sulphonic acid C18                                                                                                                                                                                                                          |
| 336,060883  | C23H12O5      | 16294-75-0  | Solvent Orange 63 (14H-ANTHRA(2,1,9-MNA)THIOXANTHEN-14-ONE)                                                                                                                                                                                           |
| 336,157288  | C18H24O6      | 85-70-1     | Phthalic acid, mixed esters with butyl glycolate and butanol                                                                                                                                                                                          |
| 336,976257  | C8H7NNa4O8    | 144538-83-0 | Tetrasodium iminodisuccinate                                                                                                                                                                                                                          |
| 337,134583  | C20H20ClN3    | 632-99-5    | Basic Violet 14                                                                                                                                                                                                                                       |
| 337,3106556 | C22H41O2      |             | erucic acid, docosenoic acid                                                                                                                                                                                                                          |
| 337,334465  | C22H43NO      |             | Erucamide                                                                                                                                                                                                                                             |
| 337,334473  | C22H43NO      | 112-84-5    | Erucamide                                                                                                                                                                                                                                             |
| 337,33449   | C22H43NO      |             | (Z)-docos-13-enamide                                                                                                                                                                                                                                  |
| 338,172943  | C18H26O6      | 3290-92-4   | 1,1,1-Trimethylolpropane trimethacrylate                                                                                                                                                                                                              |
| 338,20932   | C19H30O5      | 1166-52-5   | Gallic acid, dodecyl ester                                                                                                                                                                                                                            |
| 338,245697  | C20H34O4      | 2212-81-9   | 1,3-Bis(tertbutylperoxyisopropyl)benzene                                                                                                                                                                                                              |
| 338,2457096 | C20H34O4      |             | Triton X-45 n=3                                                                                                                                                                                                                                       |
| 338,318481  | C22H42O2      | 112-86-7    | Erucic acid                                                                                                                                                                                                                                           |
| 339,350128  | C22H45NO      | 3061-75-4   | Behenamide                                                                                                                                                                                                                                            |
| 340,0865    | C19H17O4P     |             | Cresyl diphenyl phosphate                                                                                                                                                                                                                             |
| 340,152191  | C17H24O7      | 68186-31-2  | 1,2,4-Benzenetricarboxylic acid, 2-ethylhexyl ester                                                                                                                                                                                                   |
| 340,16745   | C21H24O4      | 1675-54-3   | 2,2-Bis(4-Hydroxyphenyl)propane bis(2,3-epoxypropyl) ether (=Badge)                                                                                                                                                                                   |
| 340,16745   | C21H24O4      | 474510-57-1 | 2-Hydroxy-1-(4-(4-(2-hydroxy-2-methylpropionyl)benzyl)phenyl-2-methyl-2-propanone                                                                                                                                                                     |
| 340,1674593 | C21H24O4      |             | BADGE                                                                                                                                                                                                                                                 |
| 340,2072406 | C19H32O3S     |             | Mesamoll mono SO3 C13                                                                                                                                                                                                                                 |
| 340,2191009 | C26H28        |             | butadiene n=12                                                                                                                                                                                                                                        |
| 340,240234  | C23H32O2      | 119-47-1    | 2,2'-Methylene bis(4-methyl-6-tert-butylphenol)                                                                                                                                                                                                       |
| 340,2613847 | C20H36O4      |             | Di-(2-ethylhexyl)fumarate                                                                                                                                                                                                                             |
| 340,29776   | C21H40O3      | 1330-80-9   | 1,2-Propyleneglycol monooleate                                                                                                                                                                                                                        |
| 340,334137  | C22H44O2      | 112-85-6    | Behenic acid                                                                                                                                                                                                                                          |
| 340,334137  | C22H44O2      | 123-95-5    | Stearic acid, butyl ester                                                                                                                                                                                                                             |
| 340,964783  | C3H13N3O10Zr  | 32535-84-5  | Zirconyl ammonium carbonate                                                                                                                                                                                                                           |
| 341,069794  | C15H17Cl2N3O2 | 60207-90-1  | propiconazole                                                                                                                                                                                                                                         |
| 341,116425  | C21H15N3O2    | 3271-22-5   | 2,4-Dimethoxy-6-(1-pyrenyl)-1,3,5-triazine                                                                                                                                                                                                            |
| 341,116425  | C21H15N3O2    | 3271-22-5   | 2,4-Dimethoxy-6-pyren-1-yl-1,3,5-triazine                                                                                                                                                                                                             |
| 341,152466  | C16H30MnO4    | 15956-58-8  | 2-Ethylhexanoic acid, manganese salt                                                                                                                                                                                                                  |
| 342,116211  | C12H22O11     | 57-50-1     | Sucrose                                                                                                                                                                                                                                               |
| 342,1467    | C20H22O5      |             | Dipropylene glycol benzoate                                                                                                                                                                                                                           |
| 342,173218  | C23H22N2O     | 3008-87-5   | 7H-Dibenz[f,j]isoquinolin-7-one, 4-(cyclohexylamino)-2-methyl-                                                                                                                                                                                        |
| 342,313385  | C21H42O3      | 1323-39-3   | 1,2-Propyleneglycol monostearate                                                                                                                                                                                                                      |
| 343,986024  | C6H6O4PF9     |             | 4:2 monoPAP                                                                                                                                                                                                                                           |
| 344,057251  | C10H15N2Na3O7 | 139-89-9    | N-(2-Hydroxyethyl)ethylenediaminetriacetic acid, trisodium salt                                                                                                                                                                                       |
| 344,104218  | C14H20N2O6S   | 55-55-0     | Phenol, p-(methlamino)-, sulfate (2:1)                                                                                                                                                                                                                |
| 344,198761  | C21H28O4      | 116-37-0    | 1,1'-Isopropylidenebis(p-phenyleneoxy)dipropan-2-ol                                                                                                                                                                                                   |
| 344,1997552 | C16H33O4SNa   |             | Atmer 191 C16                                                                                                                                                                                                                                         |
| 346,1627678 | C16H26O8      |             | acetyl dibutyl citrate                                                                                                                                                                                                                                |
| 346,235535  | C18H34O6      | 1338-39-2   | Sorbitan monolaurate                                                                                                                                                                                                                                  |
| 346,235535  | C18H34O6      | 16111-62-9  | Bis(2-ethylhexyl) peroxydicarbonate                                                                                                                                                                                                                   |
| 346,323578  | C24H42O       | 134701-20-5 | 2,4-Dimethyl-6-(1-methylpentadecyl)-phenol                                                                                                                                                                                                            |
| 348,085846  | C18H12N4O4    | 26747-90-0  | 2,4-Toluene diisocyanate dimeric                                                                                                                                                                                                                      |
| 348,1128369 | C19H21O4Cl    |             | BFDGE.HCl                                                                                                                                                                                                                                             |
| 348,12793   | C22H21O2P     | 75980-60-8  | Diphenyl(2,4,6-trimethylbenzoyl)phosphine oxide                                                                                                                                                                                                       |
| 348,1572885 | C19H24O6      |             | BFDGE.2H <sub>2</sub> O                                                                                                                                                                                                                               |
| 348,230072  | C21H32O4      | 3089-55-2   | Benzyl octyl adipate                                                                                                                                                                                                                                  |
| 350,143555  | C16H30O4Zn    | 136-53-8    | Zinc bis(2-ethylhexanoate)                                                                                                                                                                                                                            |
| 350,143555  | C16H30O4Zn    | 136-53-8    | 2-Ethylhexanoic acid zinc salt                                                                                                                                                                                                                        |
| 350,224579  | C24H30O2      | 869198-26-9 | 5,7-Di-tert-butyl-3-(3,4- and 2,3-dimethylphenyl)-3H-benzofuran-2-one containing: a) 5,7-di-tert-butyl-3-(3,4-dimethylphenyl)-3H-benzofuran-2-one (80 to 100% w/w) and b) 5,7-di-tert-butyl-3-(2,3-dimethylphenyl)-3H-benzofuran-2-one (0 to 20% w/w) |
| 350,258606  | C18H39O4P     | 39471-52-8  | Phosphoric acid, octadecyl esters                                                                                                                                                                                                                     |
| 351,231049  | C22H29N3O     | 25973-55-1  | Tinuvin 328                                                                                                                                                                                                                                           |
| 352,115814  | C17H20O8      | 4986-89-4   | Pentaerythritol tetraacrylate                                                                                                                                                                                                                         |
| 352,132416  | C22H16N4O     | 85-86-9     | Solvent Red 23                                                                                                                                                                                                                                        |
| 352,334137  | C23H44O2      | 48076-38-6  | Acrylic acid, eicosyl ester                                                                                                                                                                                                                           |
| 353,068756  | C15H21FeO6    | 14024-18-1  | Tris(pentane-2,4-dionato)iron(III)                                                                                                                                                                                                                    |
| 353,3293796 | C22H43NO2     |             | 13-hydroxy-cis-14-docosenamide                                                                                                                                                                                                                        |
| 354,189392  | C14H34O6Si2   | 16068-37-4  | 1,2-Bis(triethoxysilyl)ethane                                                                                                                                                                                                                         |
| 354,2228907 | C20H34O3S     |             | Mesamoll mono SO3 C14                                                                                                                                                                                                                                 |
| 354,234741  | C27H30        | 41906-71-2  | 1H-Indene *2,3-dihydro-1,3-dimethyl-1-(2-methyl-2-phenylpropyl)-3-phenyl-                                                                                                                                                                             |
| 354,234985  | C27H30        | 62604-62-0  | 4,6-Dimethyl-2,4,6-triphenyl-1-heptene                                                                                                                                                                                                                |
| 354,2553337 | C21H10D14O4   |             | d14 BADGE                                                                                                                                                                                                                                             |
| 354,277008  | C21H38O4      | 140-03-4    | Acetylricinoleic acid, methyl ester                                                                                                                                                                                                                   |

|             |               |             |                                                                                           |
|-------------|---------------|-------------|-------------------------------------------------------------------------------------------|
| 355,057709  | C20H12NaO5    | 518-47-8    | Sodium fluorescein (Acid Yellow 73)                                                       |
| 356,125977  | C20H20O6      | 32647-67-9  | Dibenzylidene sorbitol                                                                    |
| 356,2926598 | C21H40O4      |             | Glycerol monooleate                                                                       |
| 356,292664  | C21H40O4      | 109-31-9    | Azelaic acid, di-n-hexyl ester                                                            |
| 356,292664  | C21H40O4      | 68515-75-3  | Adipic acid, dialkyl esters (C7-C9)                                                       |
| 356,292999  | C21H40O4      | 25496-72-4  | Glycerol monooleate                                                                       |
| 357,160797  | C20H24ClN3O   | 3864-99-1   | 2-(2'-Hydroxy-3,5'-di-tert-butylphenyl)-5-chlorobenzotriazole                             |
| 358,1780239 | C21H26O5      |             | BADGE.H <sub>2</sub> O                                                                    |
| 358,196655  | C22H30O2S     | 96-69-5     | 4,4'-Thiobis(6-tert-butyl-3-methylphenol)                                                 |
| 358,214417  | C22H30O4      | 27987-25-3  | Phthalic acid, bis(methylcyclohexyl) ester                                                |
| 358,2154053 | C17H35O4SNa   |             | Atmer 191 C17                                                                             |
| 358,235535  | C19H34O6      | 30899-62-8  | Glycerol monolaurate diacetate                                                            |
| 358,2355639 | C19H34O6      |             | Acetylated glyceride (literature)                                                         |
| 358,3083098 | C21H42O4      |             | Glycerol monostearate                                                                     |
| 358,308319  | C21H42O4      | 31566-31-1  | Stearic acid, monoester with glycerol                                                     |
| 358,8522414 | C12H5Cl6      |             | PCB 6                                                                                     |
| 359,980072  | C10H20N2S4Zn  | 14324-55-1  | Diethyldithiocarbamic acid, zinc salt                                                     |
| 360,115356  | C18H21AlO6    | 16899-72-2  | 2,4-Hexadienoic acid, aluminum salt, (E,E)-                                               |
| 360,127014  | C12H24O12     | 8013-17-0   | Invert sugar                                                                              |
| 360,214813  | C18H32O7      | 77-94-1     | Citric acid, tributyl ester                                                               |
| 361,204193  | C24H27NO2     | 6197-30-4   | 2-Cyano-3,3-diphenylacrylic acid, 2-ethylhexyl ester                                      |
| 361,276947  | C26H35N       | 52047-59-3  | 2-(4-Dodecylphenyl)indole                                                                 |
| 361,347534  | C22H48ClN     | 7173-51-5   | Didecyltrimethylammonium chloride                                                         |
| 362,1647    | C20H27O4P     |             | Diphenyl 2-ethylhexyl phosphate                                                           |
| 362,164703  | C20H27O4P     | 1241-94-7   | Phosphoric acid, diphenyl 2-ethylhexyl ester                                              |
| 362,245697  | C22H34O4      | 3648-21-3   | diheptyl phthalate                                                                        |
| 362,2457    | C22H34O4      |             | Diheptyl phthalate                                                                        |
| 362,272186  | C25H34N2      | 2162-74-5   | Bis(2,6-diisopropylphenyl) carbodiimide                                                   |
| 363,0443    | C11H9O2F10    |             | Fluoroacrylate (5 CF entities)                                                            |
| 363,250061  | C19H42BrN     | 57-09-0     | Hexadecyltrimethylammonium bromide                                                        |
| 363,9769    | C7HO2F13      |             | PFHepA                                                                                    |
| 364,013     | C8H5OF13      |             | 6:2 FTOH                                                                                  |
| 364,170624  | C23H25ClN2    | 18015-76-4  | Pigment Green 4 (Malachite Green)                                                         |
| 366,1234016 | C19H23O5Cl    |             | BFDGE.H <sub>2</sub> O.HCl                                                                |
| 366,230713  | C23H30N2O2    | 119313-12-1 | 1-Butanone, 2-(dimethylamino)-1-[4-(4-morpholinyl)phenyl]-2-(phenylmethyl)-               |
| 366,234751  | C28H30        |             | butadiene n=13                                                                            |
| 367,300568  | C23H42ClN     | 68391-01-5  | Dimethylalkyl(C12-C18)benzylammonium chloride                                             |
| 367,813507  | C9H2Cl6O3     | 115-27-5    | Hexachloroendomethylenetetrahydrophthalic anhydride                                       |
| 368,079712  | C22H12N2O4    | 18600-59-4  | 2,2'-(1,4-Phenylene)bis[4H-3,1-benzoxazin-4-one]                                          |
| 368,198761  | C23H28O4      | 68515-40-2  | 1,2-Benzenedicarboxylic acid, benzyl C7-9-branched and linear alkyl esters                |
| 368,2385407 | C21H36O3S     |             | Mesamoll mono SO3 C15                                                                     |
| 368,271515  | C25H36O2      | 88-24-4     | 2,2'-Methylene bis(4-ethyl-6-tert-butylphenol)                                            |
| 368,339996  | C22H44N2O2    | 93-81-2     | N-(2-Aminoethyl)-N-(2-hydroxyethyl)oleamide                                               |
| 368,3654    | C24H48O2      |             | 2-Ethylhexyl palmitate                                                                    |
| 368,365417  | C24H48O2      | 557-59-5    | Lignoceric acid                                                                           |
| 368,3654558 | C24H48O2      |             | 2-Ethylhexyl palmitate                                                                    |
| 370,178009  | C22H26O5      | 72004-73-0  | Acrylic acid, 2-[4-[1-[4-(2-hydroxyethoxy)phenyl]-1-methylethyl]phenoxy]ethyl ester       |
| 370,3083    | C22H42O4      |             | Heptyl nonyl adipate                                                                      |
| 370,308319  | C22H42O4      | 103-23-1    | Adipic acid, bis(2-ethylhexyl) ester                                                      |
| 370,308319  | C22H42O4      | 123-79-5    | Adipic acid, di-n-octyl ester                                                             |
| 370,3083349 | C22H42O4      |             | Bis(2-ethylhexyl) adipate                                                                 |
| 370,3083349 | C22H42O4      |             | Dioctyl adipate                                                                           |
| 370,3083349 | C22H42O4      |             | Dioctyl adipate                                                                           |
| 370,3083349 | C22H42O4      |             | Bis(2-ethylhexyl) adipate                                                                 |
| 372,1784429 | C18H28O8      |             | Polyadipate (literature)                                                                  |
| 372,2310554 | C18H37O4SNa   |             | Atmer 191 C18                                                                             |
| 372,287567  | C21H40O5      | 1323-38-2   | Glycerol monoricinolate                                                                   |
| 373,251801  | C25H31N3      | 603-48-5    | Aniline, 4,4',4''-methylidynetris[N,N-dimethyl- (Leucomethyl green)                       |
| 374,174011  | C22H22N4O2    | 29190-28-1  | Resorcinol, 2,4-bis(xylylazo)-                                                            |
| 375,065369  | C18H16N3NaO3S | 587-98-4    | Acid Yellow 36                                                                            |
| 375,252197  | C21H33N3O3    | 745070-61-5 | 1,3,5-Tris (2,2-dimethylpropanamido)-benzene                                              |
| 376,144137  | C21H25O4Cl    |             | BADGE.HCl                                                                                 |
| 376,1885886 | C21H28O6      |             | BADGE 2H <sub>2</sub> O                                                                   |
| 379,116821  | C20H17N3O5    | 12217-80-0  | 4,11-Diamino-2-(3-methoxypropyl)-1H-naphth(2,3-f)isoindol-1,3,5,10(2H)-tetrone            |
| 380,011932  | C20H10Cl2N2O2 | 3089-16-5   | Quino[2,3-b]acridine-7,14-dione, 4,11-dichloro-5,12-dihydro-                              |
| 380,163696  | C24H20N4O     | 85-83-6     | Solvent Red 24                                                                            |
| 380,246368  | C24H32N2O2    | 119344-86-4 | 1-Butanone, 2-(dimethylamino)-2-[(4-methylphenyl)methyl]-1-[4-(4-morpholinyl)phenyl]-     |
| 380,365417  | C25H48O2      | 18299-85-9  | Acrylic acid, docosyl ester                                                               |
| 382,051788  | C22H14CaO4    | 61789-36-4  | Naphthenic acids, calcium salts                                                           |
| 382,103821  | C14H24Na2O7S  | 37294-49-8  | Sulphosuccinic acid, isodecyl ester, disodium salt                                        |
| 382,2541908 | C22H38O3S     |             | Mesamoll mono SO3 C16                                                                     |
| 382,2719243 | C22H38O5      |             | Triton X-45 n=4                                                                           |
| 382,28717   | C26H38O2      | 85-60-9     | 1,1-Bis(2-methyl-4-hydroxy-5-tertbutylphenyl)butane                                       |
| 383,220886  | C22H29N3O3    | 79916-07-7  | Phenoxazin-5-ium, 3,7-bis(diethylamino)-, acetate                                         |
| 384,0895146 | C19H22O4Cl2   |             | BFDGE.2HCl                                                                                |
| 385,824066  | C9H4Cl6O4     | 115-28-6    | Hexachloroendomethylenetetrahydrophthalic acid                                            |
| 386,1729386 | C22H26O6      |             | Irgaclear DM                                                                              |
| 386,2093241 | C23H30O5      |             | BADGE.EtOH                                                                                |
| 386,318481  | C26H42O2      | 58446-52-9  | Stearoylbenzoylmethane                                                                    |
| 386,341003  | C24H42N4      | 80584-90-3  | 1H-Benzotriazole-1-methanamine, N,N-bis(2-ethylhexyl)-4-methyl-                           |
| 388,212006  | C21H24N8      | 4482-25-1   | 1,3-Benzenediamine-4,4'-[(4-methyl-1,3-phenylene)bis(azo)] bis[6-methyl-                  |
| 389,116425  | C25H15N3O2    | 3333-62-8   | 7-(2H-Naphtho-( 1,2-D)triazol-2-yl)-3-phenylcoumarin                                      |
| 389,246704  | C25H31N3O     | 467-63-0    | Tris[4-(dimethylamino)phenyl]methanol (solvent Violet 9)                                  |
| 390,195984  | C22H31O4P     | 29761-21-5  | Phosphoric acid, diphenyl isodecyl ester                                                  |
| 390,222687  | C15H30N6O6    | 3089-11-0   | N,N,N',N',N'',N'''-Hexakis(methoxymethyl)-2,4,6-triamino-1,3,5-triazine                   |
| 390,222687  | C15H30N6O6    | 68002-20-0  | 1,3,5-Triazine-2,4,6-triamine, polymer with formaldehyde, methylated                      |
| 390,277008  | C24H38O4      | 117-81-7    | Phthalic acid, bis(2-ethylhexyl) ester                                                    |
| 390,277008  | C24H38O4      | 117-84-0    | Phthalic acid, di-n-octyl ester                                                           |
| 390,277008  | C24H38O4      | 27554-26-3  | Phthalic acid, diisooctyl ester                                                           |
| 390,277008  | C24H38O4      | 6422-86-2   | Terephthalic acid, bis(2-ethylhexyl)ester                                                 |
| 390,277008  | C24H38O4      | 68515-41-3  | 1,2-Benzenedicarboxylic acid, di-C7-9-branched and linear alkyl esters                    |
| 390,277008  | C24H38O4      | 68515-43-5  | 1,2-Benzenedicarboxylic acid, di-C9-11-branched and linear alkylesters                    |
| 390,2770097 | C24H38O4      |             | DEHP                                                                                      |
| 390,2770347 | C24H38O4      |             | Bis(2-ethylhexyl) phthalate                                                               |
| 390,2770347 | C24H38O4      |             | Bis(2-ethylhexyl) terephthalate                                                           |
| 390,2770347 | C24H38O4      |             | Dioctyl phthalate                                                                         |
| 390,2770347 | C24H38O4      |             | Bis(2-ethylhexyl) phthalate                                                               |
| 390,2770347 | C24H38O4      |             | Di-n-octyl phthalate                                                                      |
| 392,250401  | C30H32        |             | butadiene n=14                                                                            |
| 392,271515  | C27H36O2      | 4066-02-8   | 2,2'-Methylenebis(4-methyl-6-cyclohexylphenol)                                            |
| 392,8132691 | C12H4Cl7      |             | PCB 7                                                                                     |
| 393,278015  | C25H35N3O     | 125304-04-3 | Phenol, 2-(2H-benzotriazol-2-yl)-6-dodecyl-4-methyl-, branched and linear                 |
| 394,1547017 | C21H27O5Cl    |             | BADGE H <sub>2</sub> O.HCl                                                                |
| 394,250793  | C26H34O3      | 61167-58-6  | Acrylic acid, 2-tert-butyl-6-(3-tert-butyl-2-hydroxy-5-methylbenzyl)-4-methylphenyl ester |
| 394,4035476 | C24H50N4      |             | Chimassorb 944 part a                                                                     |
| 395,194397  | C20H29NO7     | 64147-40-6  | Castor oil, dehydrated                                                                    |
| 396,2698409 | C23H10O3S     |             | Mesamoll mono SO3 C17                                                                     |
| 396,323975  | C24H44O4      | 140-04-5    | Acetylricinoleic acid, butyl ester                                                        |
| 396,3967    | C26H52O2      |             | 2-Ethylhexyl stearate                                                                     |
| 396,396729  | C26H52O2      | 22047-49-0  | 2-Ethylhexyl stearate                                                                     |
| 396,3967559 | C26H52O2      |             | 2-Ethylhexyl stearate                                                                     |
| 397,178925  | C20H34CoO4    | 61789-51-3  | Naphthenic acid, cobalt salts                                                             |
| 397,295898  | C20H44ClNO4   | 6200-40-4   | Bis(2-hydroxyethyl)-2-hydroxypropyl-3-(dodecyloxy)methylammonium chloride                 |
| 397,3318    | C24H46O4      |             | Diisononyl adipate                                                                        |
| 398,023987  | C22H14FeO4    | 1338-14-3   | Naphthenic acids, iron salts                                                              |
| 398,105988  | C14H22O13     | 9005-32-7   | Alginate acid                                                                             |
| 398,131653  | C23H24Cl2N2   | 3521-06-0   | Basic Blue 1                                                                              |



|             |               |             |                                                                                                             |
|-------------|---------------|-------------|-------------------------------------------------------------------------------------------------------------|
| 398,243347  | C18H39O7P     | 78-51-3     | Phosphoric acid, tris-(2-butoxyethyl)phosphate                                                              |
| 398,266846  | C22H38O6      | 15520-11-3  | Percarbonic acid, bis (4-tert-butylcyclohexyl) ester                                                        |
| 398,3396    | C24H46O4      | 110-29-2    | Adipic acid, n-decyl-, n-octyl ester                                                                        |
| 399,9439    | C6HO3F13S     |             | PFHxS                                                                                                       |
| 400,2249741 | C24H32O5      |             | BADGE PrOH                                                                                                  |
| 401,326725  | C23H45O5      |             | Acetylated glyceride (literature)                                                                           |
| 402,2253681 | C20H34O8      |             | ATBC                                                                                                        |
| 402,225372  | C20H34O8      | 77-90-7     | Tri-n-butyl acetyl citrate                                                                                  |
| 402,2253931 | C20H34O8      |             | Acetyltributyl citrate                                                                                      |
| 402,298126  | C22H42O6      | 26266-57-9  | Sorbitan monopalmitate                                                                                      |
| 402,335388  | C24H50S2      | 27458-90-8  | Di-tert-dodecyl disulphide                                                                                  |
| 405,923431  | C18H6Cl4N2O   | 20749-68-2  | 8,9,10,11-tetrachloro-12-phthaloperinone (Solvent Red 135)                                                  |
| 406,229675  | C30H30O       | 18254-13-2  | 2,4,6-Tris(1-phenylethyl)phenol                                                                             |
| 406,229675  | C30H30O       | 25640-71-5  | Phenol, tris(1-phenylethyl)-                                                                                |
| 407,930634  | C12H19Cl7     | 63449-39-8  | 1,2,3,4,6,7,10-Heptachlorododecane                                                                          |
| 410,2854909 | C24H42O3S     |             | Mesamoll mono SO3 C18                                                                                       |
| 412,1208147 | C21H26O4Cl2   |             | BADGE 2HCL                                                                                                  |
| 412,355255  | C25H48O4      | 103-24-2    | Azelaic acid, bis(2-ethylhexyl)ester                                                                        |
| 412,3553    | C25H48O4      |             | Di(2-ethylhexyl)azelate                                                                                     |
| 413,0411    | C12H9O2F12    |             | Fluoroacrylate (6 CF entities)                                                                              |
| 413,973694  | C8HF15O2      | 3825-26-1   | Perfluorooctanoic acid, ammonium salt                                                                       |
| 413,9737    | C8HO2F15      |             | PFOA                                                                                                        |
| 414,136841  | C28H18N2O2    | 1533-45-5   | 4,4'-Bis(2-benzoxazolyl)stilbene                                                                            |
| 414,204254  | C24H30O6      | 135861-56-2 | Bis(3,4-dimethylbenzylidene)sorbitol                                                                        |
| 414,2406242 | C25H34O5      |             | BADGE BuOH                                                                                                  |
| 414,261749  | C22H38O7      | 137-66-6    | Ascorbyl palmitate                                                                                          |
| 414,370911  | C25H50O4      | 30233-64-8  | Glycerol monobehenate                                                                                       |
| 414,4914    | C24H30O6      | 79072-96-1  | Bis(4-ethylbenzylidene)sorbitol                                                                             |
| 415,1203    | C14H22N3NaO10 | 7578-43-0   | Diethylenetriaminepentaacetic acid, sodium salts                                                            |
| 416,2198888 | C24H32O6      |             | BADGE MeEtOH                                                                                                |
| 417,2582261 | C32H33        |             | styrene n=4                                                                                                 |
| 418,169769  | C26H27O3P     | 162881-26-7 | Phenyl bis(2,4,6-trimethylbenzoyl) phosphine oxide                                                          |
| 418,192993  | C30H26O2      | 40470-68-6  | 1,1'-Biphenyl, 4,4'-bis[2-(2-methoxyphenyl)ethenyl]-                                                        |
| 418,2355388 | C24H34O6      |             | BADGE H <sub>2</sub> O PrOH                                                                                 |
| 418,236511  | C19H39NaO6S   | 83721-45-3  | 2,3-Bis[(2-ethylhexyl)oxy]propane-1-sodium sulphate                                                         |
| 418,237     | C19H39NaO6S   | 62174-79-2  | 1, 3-Bis[(2-ethylhexyl)oxy]propane-2-sodium sulphate                                                        |
| 418,2660511 | C32H34        |             | butadiene n=15                                                                                              |
| 418,3083    | C26H42O4      |             | n-Octyl-n-decyl phthalate                                                                                   |
| 418,308319  | C26H42O4      | 68515-48-0  | Phthalic acid, diesters with primary, saturated C8-C10 branched alcohols, more than 60 % C9                 |
| 418,3083349 | C26H42O4      |             | Diisononyl phthalate                                                                                        |
| 418,3083349 | C26H42O4      |             | Diisononyl phthalate                                                                                        |
| 418,3446953 | C27H46O3      |             | Irganox 1076 thermal degradation products                                                                   |
| 420,215759  | C18H37NaO7S   | 13150-00-0  | Ethanol, 2-[2-[2-(dodecyloxy)ethoxy]ethoxy]-, hydrogen sulfate,sodium salt                                  |
| 420,302826  | C29H40O2      | 77-62-3     | 2,2'-Methylenebis(4-methyl-6-(1-methyl-cyclohexyl) phenol)                                                  |
| 421,7796483 | C12HO2Cl7     |             | 1,2,3,4,6,7,8-heptachlorodibenzo-p-dioxin                                                                   |
| 423,127777  | C18H21N3O9    | 40220-08-4  | Tris(2-hydroxyethyl) isocyanurate triacrylate                                                               |
| 424,153992  | C25H20N4O3    | 16403-84-2  | (4-((5-Carbamoyl-o-tolyl)azo)-3-hydroxynaphth-2-anilide) Pigment Red 268                                    |
| 424,283356  | C25H44O52     | 110553-27-0 | 2,4-Bis(octylthiomethyl)-6-methylphenol                                                                     |
| 424,301141  | C25H44O3S     |             | Mesamoll mono SO3 C19                                                                                       |
| 424,355255  | C26H48O4      | 166412-78-8 | 1,2-Cyclohexanedicarboxylic acid, diisononyl ester                                                          |
| 424,3552851 | C26H48O4      |             | Diisononyl cyclohexane-1,2-dicarboxylate                                                                    |
| 425,210327  | C27H27N3O2    | 147315-50-2 | 2-(4,6-Diphenyl-1,3,5-triazin-2-yl)-5-(hexyloxy)phenol                                                      |
| 426,132996  | C24H18N4O4    | 6448-95-9   | Pigment Red 22                                                                                              |
| 426,2981391 | C24H42O6      |             | Triton X-45 n=5                                                                                             |
| 426,3709    | C26H50O4      |             | Di(2-ethylhexyl)sebacate                                                                                    |
| 426,3709    | C26H50O4      |             | Diisodecyl adipate                                                                                          |
| 426,370911  | C26H50O4      | 2432-87-3   | Sebacic acid, di-n-octyl ester                                                                              |
| 426,370911  | C26H50O4      | 27178-16-1  | Adipic acid, diisodecyl ester                                                                               |
| 426,370911  | C26H50O4      | 122-62-3    | Sebacic acid, bis(2-ethylhexyl) ester                                                                       |
| 426,7742968 | C12H3Cl8      |             | PCB 8                                                                                                       |
| 427,231842  | C20H33N3O7    | 57116-45-7  | 1-Aziridinepropanoic acid *2-[[3-(1-aziridiny)-1-oxopropoxy]methyl]-2-(hydroxymethyl)-1,3-propanediyl ester |
| 428,083069  | C24H16N2O4S   | 10128-55-9  | N-(2-(4-Oxo-4H-3,1-benzoxazin-2-yl)phenyl)-2-naphthalenesulfonamide                                         |
| 428,20462   | C21H32O9      | 28961-43-5  | Acrylic acid, triester with polyethylene glycol triether with 2-ethyl-2-(hydroxymethyl)-1,3-propanediol     |
| 428,313782  | C24H44O6      | 620-67-7    | Glycerol triheptanoate                                                                                      |
| 428,313782  | C24H44O6      | 1338-43-8   | Sorbitan monooleate                                                                                         |
| 429,358025  | C25H49O5      |             | Acetylated glyceride (literature)                                                                           |
| 430,1714988 | C26H26N2O2S   |             | Uvitex OB                                                                                                   |
| 430,171509  | C26H26N2O2S   | 7128-64-5   | 2,5-Bis(5-tert-butyl-2-benzoxazolyl)thiophene                                                               |
| 430,2355388 | C25H34O6      |             | BADGE EtEtOH                                                                                                |
| 430,329437  | C24H46O6      | 1338-41-6   | Sorbitan monostearate                                                                                       |
| 430,381073  | C29H50O2      | 59-02-9     | α-Tocopherol                                                                                                |
| 431,043945  | C21H14NNaO6S  | 4430-18-6   | Acid Violet 43                                                                                              |
| 432,2511889 | C25H36O6      |             | BADGE H <sub>2</sub> O BuOH                                                                                 |
| 432,2511889 | C25H36O6      |             | BADGE.2EtOH                                                                                                 |
| 434,2093241 | C27H30O5      |             | BADGE Ph                                                                                                    |
| 434,2304534 | C24H34O7      |             | BADGE H <sub>2</sub> O MeEtOH                                                                               |
| 434,287964  | C22H42O8      | 9005-67-8   | Polyethyleneglycol sorbitan monostearate                                                                    |
| 434,352509  | C24H51O4P     | 78-42-2     | Phosphoric acid, tris(2-ethylhexyl) ester                                                                   |
| 436,145813  | C18H36O2SSn   | 15535-79-2  | Di-n-octyltin mercaptoacetate                                                                               |
| 438,313385  | C29H42O3      | 4221-80-1   | 3,5-Di-tert-butyl-4-hydroxybenzoic acid, 2,4-di-tert-butylphenyl ester                                      |
| 438,3167911 | C26H46O3S     |             | Mesamoll mono SO3 C20                                                                                       |
| 438,349792  | C30H46O2      | 35958-30-6  | 1,1-Bis(2-hydroxy-3,5-di-tert-butylphenyl)ethane                                                            |
| 440,14801   | C25H20N4O4    | 6655-84-1   | Pigment Red 17                                                                                              |
| 440,148468  | C25H20N4O4    | 36968-27-1  | Pigment Red 266                                                                                             |
| 440,386566  | C27H52O4      | 22788-19-8  | 1,2-Propyleneglycol dilaurate                                                                               |
| 442,225647  | C28H30N2O3    | 509-34-2    | Baso Red 546                                                                                                |
| 442,2719243 | C27H38O5      |             | BADGE.HexOH                                                                                                 |
| 442,29306   | C24H42O7      | 25395-66-8  | Ascorbyl stearate                                                                                           |
| 442,381073  | C30H50O2      | 8001-75-0   | Ceresin                                                                                                     |
| 443,337325  | C25H47O6      |             | Acetylated glyceride (literature)                                                                           |
| 443,9796368 | C8H6O4PF13    |             | 6:2 monoPAP                                                                                                 |
| 444,110992  | C28H16N2O4    | 4051-63-2   | 4,4'-Diamino-1,1'-bianthracene-9,9',10,10'-tetrone (Pigment Red 177)                                        |
| 444,215759  | C20H37NaO7S   | 1639-66-3   | Succinic acid, sulfo-, 1,4-diocetyl ester, sodium salt                                                      |
| 444,2817012 | C34H36        |             | butadiene n=16                                                                                              |
| 444,308716  | C24H44O7      | 1337-33-3   | 1,2,3-Propanetricarboxylic acid, 2-hydroxy-, octadecyl ester                                                |
| 446,3396    | C28H46O4      | 53306-54-0  | 1,2-Benzenedicarboxylic acid, bis(2-propylheptyl) ester                                                     |
| 446,3396    | C28H46O4      | 84-77-5     | Phthalic acid, di-n-decyl ester                                                                             |
|             |               |             | Phthalic acid, diesters with primary, saturated                                                             |
| 446,3396    | C28H46O4      | 68515-49-1  | C9-C11 alcohols more than 90 % C10                                                                          |
| 446,339635  | C28H46O4      |             | Diisodecyl phthalate                                                                                        |
| 446,339635  | C28H46O4      |             | Diisodecyl phthalate                                                                                        |
| 446,339635  | C28H46O4      |             | Di-n-decyl phthalate                                                                                        |
| 447,230988  | C30H29N3O     | 70321-86-7  | 2-[2-Hydroxy-3,5-bis(1,1-dimethylbenzyl)phenyl]benzotriazole                                                |
| 447,2310626 | C30H29N3O     |             | Tinuvin 234                                                                                                 |
| 447,290405  | C27H42ClNO2   | 121-54-0    | Ammonium, benzyldimethyl[2-[2-[p-(1,1,3,3-tetramethylbutyl)phenoxy]ethoxy]ethyl]-, chloride                 |
| 448,2461035 | C25H36O7      |             | BADGE H <sub>2</sub> O EtEtOH                                                                               |
| 448,276611  | C33H36O       | 85305-20-0  | Phenol, 2,4,6-tris[1-(methylphenyl)ethyl]-                                                                  |
| 448,276611  | C33H36O       | 83804-01-7  | Tris(1-(methylphenyl)ethyl)phenol                                                                           |
| 450,295746  | C24H43NaO6    | 25383-99-7  | Stearoyl-2-lactic acid, sodium salt                                                                         |
| 450,326294  | C27H47O3P     | 161717-32-4 | 2,4,6-Tris(tert-butyl)phenyl-2-butyl-2-ethyl-1,3-propanediol phosphite                                      |
| 450,393372  | C26H50N4O2    | 124172-53-8 | N,N'-Bis(2,2,6,6-tetramethyl-4-piperidyl)-N,N'-diformylhexamethylene diamine                                |
| 452,211639  | C27H33O4P     | 2502-15-0   | Phenol, 4-(1-methylethyl)-, phosphate (3:1)                                                                 |
| 452,211639  | C27H33O4P     | 68937-41-7  | Phenol, isopropylated, phosphate (3:1)                                                                      |
| 452,2198888 | C27H32O6      |             | BADGE H <sub>2</sub> O Ph                                                                                   |
| 452,3324411 | C27H48O3S     |             | Mesamoll mono SO3 C21                                                                                       |
| 452,365417  | C31H48O2      | 19546-20-4  | 2,2-Bis(3,5-di-n-octyl-4-hydroxyphenyl)propane                                                              |
| 454,1484051 | C22H30O6S2    |             | Mesamoll di SO3 C10                                                                                         |

|             |                |             |                                                                                                                        |
|-------------|----------------|-------------|------------------------------------------------------------------------------------------------------------------------|
| 454,241425  | C20H38O11      | 9004-67-5   | Methylcellulose                                                                                                        |
| 455,740676  | C12O2Cl8       |             | octachlorodibenzo-p-dioxin                                                                                             |
| 457,228485  | C29H32ClN3     | 2185-86-6   | Basic Blue 11                                                                                                          |
| 458,266839  | C27H38O6       |             | BADGE BuEtOH                                                                                                           |
| 458,2949818 | C28H43O3P      |             | di(2,4-di-tert-butylphenyl)phosphate                                                                                   |
| 460,093994  | C24H17ClN4O4   | 6471-50-7   | Pigment Red 14                                                                                                         |
| 460,282489  | C27H40O6       |             | BADGE 2PrOH                                                                                                            |
| 460,7353245 | C12H2Cl9       |             | PCB 9                                                                                                                  |
| 463,0379    | C13H9O2F14     |             | Fluoroacrylate (7 CF entities)                                                                                         |
| 463,9705    | C9HO2F17       |             | PFNA                                                                                                                   |
| 464,0069    | C10H5OF17      |             | 8:2 FTOH                                                                                                               |
| 464,186676  | C27H29ClN2O3   | 3068-39-1   | Basic Red 1:1                                                                                                          |
| 466,220276  | C24H34O9       | 94108-97-1  | Acrylic acid,2-[[[2,2-bis[[[1-oxo-2-propenyl]oxy]methyl]butoxy]methyl]-2-ethyl-1,3-propanediyl ester                   |
| 467,28244   | C32H37NO2      | 42887-26-3  | 9,10-Anthracenedione, 1-[[[4-dodecylphenyl]amino]-                                                                     |
| 467,29953   | C24H41N3O6     | 64265-57-2  | 1-Aziridinepropanoic acid, 2-methyl-,2-ethyl-2-[[[3-(2-methyl-1-aziridinyl)-1-oxopropoxy]methyl]-1,3-propanediyl ester |
| 468,1640552 | C23H32O6S2     |             | Mesamoll di SO3 C11                                                                                                    |
| 470,1775825 | C26H32O4P2     |             | Irgafos P-EPQ hydrolysis product                                                                                       |
| 470,2973512 | C36H38         |             | butadiene n=17                                                                                                         |
| 470,3243538 | C26H46O7       |             | Triton X-45 n=6                                                                                                        |
| 471,368625  | C27H51O6       |             | Acetylated glyceride (literature)                                                                                      |
| 472,105286  | C18H36N2S4Zn   | 136-23-2    | Dibutylldithiocarbamic acid, zinc salt                                                                                 |
| 474,2981391 | C28H42O6       |             | BADGE.PrOH.BuOH                                                                                                        |
| 474,407288  | C31H54O3       | 67845-93-6  | 3,5-Di-tert-butyl-4-hydroxybenzoic acid, hexadecyl ester                                                               |
| 474,4072956 | C31H54O3       |             | Irganox 1076 thermal degradation products                                                                              |
| 476,2774036 | C27H40O7       |             | BADGE H <sub>2</sub> O BuEtOH                                                                                          |
| 478,202332  | C28H31ClN2O3   | 989-38-8    | Basic Red 1                                                                                                            |
| 481,139008  | C26H19N5O5     | 6985-92-8   | Pigment Red 175                                                                                                        |
| 482,1797052 | C24H34O6S2     |             | Mesamoll di SO3 C12                                                                                                    |
| 486,306305  | C30H44FO2P     | 118337-09-0 | 2,2'-Ethylidenebis(4,6-di-tert-butyl phenyl) fluorophosphonite                                                         |
| 486,3262819 | C30H47O3P      |             | di(nonylphenyl)phosphite                                                                                               |
| 486,392029  | C28H54O6       | 62568-11-0  | Sorbitan monobehenate                                                                                                  |
| 487,112793  | C24H17N5O7     | 6471-49-4   | Pigment Red 23                                                                                                         |
| 487,26236   | C33H33N3O      | 6786-83-0   | α,α-Bis(4-(dimethylamino)phenyl)-4-(phenylamino)naphthalene-1-methanol (Solvent Blue 4)                                |
| 488,3137891 | C29H44O6       |             | BADGE 2BuOH                                                                                                            |
| 490,2719243 | C31H38O5       |             | BADGE tBuPh                                                                                                            |
| 490,2930537 | C28H42O7       |             | BADGE.EtOEtOH.PrOH                                                                                                     |
| 492,226166  | C22H44O4Sn     | 68928-76-7  | Dimethylbis[(1-oxonodecyl)oxy]stannane                                                                                 |
| 492,2723183 | C27H40O8       |             | BADGE 2MeEtOH                                                                                                          |
| 494,2435167 | C27H39O6Cl     |             | BADGE.BuEtOH.HCl                                                                                                       |
| 494,6963521 | C12HCl10       |             | PCB 10                                                                                                                 |
| 496,1953553 | C25H36O6S2     |             | Mesamoll di SO3 C13                                                                                                    |
| 496,3130013 | C38H40         |             | butadiene n=18                                                                                                         |
| 499,9375    | C8HO3F17S      |             | PFOS                                                                                                                   |
| 500,3349435 | C27H48O8       |             | Acetylated glyceride (literature)                                                                                      |
| 502,3211965 | C30H47O4P      |             | di(nonylphenyl)phosphate                                                                                               |
| 502,451477  | C30H63O3P      | 25448-25-3  | Triisodecyl phosphite                                                                                                  |
| 503,048065  | C14H18N3Na5O10 | 140-01-2    | Diethylenetriaminepentaacetic acid, pentasodium salt                                                                   |
| 504,169037  | C18H32O16      | 9004-53-9   | Dextrin                                                                                                                |
| 504,3087038 | C29H44O7       |             | BADGE.EtEtOH.BuOH                                                                                                      |
| 504,345093  | C30H48O6       | 1528-48-9   | Triheptyl benzene-1,2,4-tricarboxylate                                                                                 |
| 505,522278  | C34H67NO       | 16260-09-6  | Oleyl palmitamide                                                                                                      |
| 506,233612  | C30H35ClN2O3   | 2390-63-8   | Basic Violet 11                                                                                                        |
| 508,271851  | C29H42NaO4P    | 85209-91-2  | 2,2'-Methylene bis(4,6-di-tert-butylphenyl)sodium phosphate                                                            |
| 508,282489  | C31H40O6       |             | BADGE H <sub>2</sub> O 2tBuPh                                                                                          |
| 509,30423   | C33H39N3O2     | 2725-22-6   | 2,4-Bis(2,4-dimethylphenyl)-6-(2-hydroxy-4-n-octyloxyphenyl)-1,3,5-triazine                                            |
| 510,2110054 | C26H38O6S2     |             | Mesamoll di SO3 C14                                                                                                    |
| 510,367004  | C28H50N2O6     | 2516-92-9   | 1-Piperidinyl oxy, 4,4'-[1,10-dioxo-1,10-decanediyl)bis(oxy)]bis[2,2,6,6-tetramethyl]                                  |
| 512,2998704 | C28H40N4O5     |             | Nylon MXD6 n=2                                                                                                         |
| 513,0347    | C14H9O2F16     |             | Fluoroacrylate (8 CF entities)                                                                                         |
| 513,9673    | C10HO2F19      |             | PFDA                                                                                                                   |
| 514,330994  | C32H42N4O2     | 68310-04-3  | 1,3-Benzenediol, 4-[[[2,4-dimethylphenyl)azo]-2-[[[4-dodecylphenyl)azo]-                                               |
| 514,3505686 | C28H50O8       |             | Triton X-45 n=7                                                                                                        |
| 514,405579  | C30H58O4S      | 123-28-4    | Thiodipropionic acid, didodecyl ester                                                                                  |
| 520,3036184 | C29H44O8       |             | BADGE 2EtEtOH                                                                                                          |
| 521,3208263 | C40H41         |             | styrene n=5                                                                                                            |
| 522,3286513 | C40H42         |             | butadiene n=19                                                                                                         |
| 524,1715375 | C22H41O4SnCl   |             | di-n-octyltin-(ethylmaleate) chloride                                                                                  |
| 524,189392  | C25H32O12      | 60506-81-2  | Dipentaerythritol pentaacrylate                                                                                        |
| 524,2266554 | C27H40O6S2     |             | Mesamoll di SO3 C15                                                                                                    |
| 527,4464208 | C35H59O3       |             | quinone methide                                                                                                        |
| 527,4464208 | C35H59O3       |             | cinnammate                                                                                                             |
| 528,043701  | C20H24CaO10S2  | 8061-52-7   | Lignin sulphonates, calcium salt                                                                                       |
| 528,2511889 | C33H36O6       |             | BADGE 2Ph                                                                                                              |
| 528,402588  | C30H56O7       | 7147-34-4   | Citric acid, tris(2-ethylhexyl) ester                                                                                  |
| 528,6573798 | C12Cl11        |             | PCB 11                                                                                                                 |
| 530,433533  | C34H58O4       | 119-06-2    | Phthalic acid, di-n-tridecyl ester                                                                                     |
| 530,4698959 | C35H62O3       |             | Irganox 1076                                                                                                           |
| 530,46991   | C35H62O3       | 2082-79-3   | Octadecyl 3-(3,5-di-tert-butyl-4-hydroxyphenyl)propionate                                                              |
| 531,274664  | C33H39O6       |             | 3-ring-BADGE                                                                                                           |
| 532,3400039 | C31H48O7       |             | BADGE.BuOH.BuEtOH                                                                                                      |
| 532,521912  | C36H68O2       | 3687-45-4   | Oleic acid, oleyl ester                                                                                                |
| 536,408997  | C33H60O52      | 110675-26-8 | 2,4-Bis(dodecylthiomethyl)-6-methylphenol                                                                              |
| 536,528076  | C34H68N2O2     | 5518-18-3   | N,N'-Ethylenebispalmitamide                                                                                            |
| 537,584839  | C36H75NO       | 143925-92-2 | Amines, bis(hydrogenated tallow alkyl) oxidised                                                                        |
| 538,2423055 | C28H42O6S2     |             | Mesamoll di SO3 C16                                                                                                    |
| 539,75708   | C15H12Br4O2    | 79-94-7     | 3,3',5,5'-Tetrabromobisphenol A                                                                                        |
| 540,1181    | C16H21O5F13    |             | Polyethoxylate alcohol/Fluoroalkoxylate(6;5)                                                                           |
| 542,15741   | C24H44Cl6      | 63449-39-8  | Paraffins, chlorinated                                                                                                 |
| 543,9732496 | C10H6O4PF17    |             | 8:2 monoPAP                                                                                                            |
| 544,391663  | C37H52O3       | 1843-03-4   | 1,1,3-Tris(2-methyl-4-hydroxy-5-tert-butylphenyl) butane                                                               |
| 544,391663  | C37H52O3       | 1843-03-4   | 1,1,3-Tris(2-methyl-4-hydroxy-5-tert-butylphenyl) butane                                                               |
| 546,392029  | C33H54O6       | 272460-97-6 | 1-4-[[[4-Benzoylphenyl)thio]phenyl]-2-methyl-2-[[[4-methylphenyl)sulfonyl]-1-propan-1-one                              |
| 546,392029  | C33H54O6       | 27251-75-8  | Triisooctyl benzene-1,2,4-tricarboxylate                                                                               |
| 546,392029  | C33H54O6       | 3319-31-1   | Tris(2-ethylhexyl) benzene-1,2,4-tricarboxylate                                                                        |
| 546,392029  | C33H54O6       | 89-04-3     | Trioctyl trimellitate                                                                                                  |
| 546,3921    | C33H54O6       |             | Tri(2-ethylhexyl)trimellitate                                                                                          |
| 548,3349185 | C31H48O8       |             | BADGE.EtEtOH.BuEtOH                                                                                                    |
| 548,3443014 | C42H44         |             | butadiene n=20                                                                                                         |
| 548,422974  | C37H56O3       | 123968-25-2 | Acrylic acid, 2,4-di-tert.-pentyl-6-[1(3,5-di-tert.pentyl-2-hydroxyphenyl)ethyl]phenyl ester                           |
| 549,2788266 | C26H53O2SSn    |             | di-n-octyltin-(ethylhexylthioglycolate) chloride                                                                       |
| 552,2579556 | C29H14O6S2     |             | Mesamoll di SO3 C17                                                                                                    |
| 552,3927    | C34H52N2O4     | 32687-78-8  | N,N'-Bis(3-(3,5-di-tert-butyl-4-hydroxyphenyl)propionyl)hydrazide                                                      |
| 552,51178   | C35H68O4       | 33587-20-1  | 1,2-Propyleneglycol dipalmitate                                                                                        |
| 554,0729457 | C20H31O8SnCl   |             | n-octyltin-bis(ethylmaleate) chloride                                                                                  |
| 554,155029  | C22H42O4S2Sn   | 69226-44-4  | Di-n-octyltin ethyleneglycol bis(mercaptoacetate)                                                                      |
| 556,170288  | C22H44O4S2Sn   | 26636-01-1  | Dimethyltin bis(isooctyl mercaptoacetate)                                                                              |
| 556,170288  | C22H44O4S2Sn   | 57583-35-4  | Dimethyltin bis(ethylhexyl mercaptoacetate)                                                                            |
| 558,3767833 | C30H54O9       |             | Triton X-45 n=8                                                                                                        |
| 562,049683  | C28H20Na2O6S2  | 27344-41-8  | 4,4'-Bis(2-sulphostyryl)biphenyl, disodium salt                                                                        |
| 563,0315    | C15H9O2F18     |             | Fluoroacrylate (9 CF entities)                                                                                         |
| 564,0005    | C12H5OF21      |             | 10:2 FTOH                                                                                                              |
| 564,156006  | C32H25ClN4O4   | 68227-78-1  | Pigment Red 147                                                                                                        |
| 564,51178   | C36H68O4       | 61788-89-4  | Acids, fatty, unsaturated (C18), dimers, distilled                                                                     |
| 566,265958  | C38H34N2O3     | 34372-72-0  | 2'-(Dibenzylamino)-6'-diethylamino)-3H-spiro[2-benzofuran-1,9'-xanthen]-3-one Green DCF)                               |
| 566,2736056 | C30H46O6S2     |             | Mesamoll di SO3 C18                                                                                                    |
| 568,224304  | C30H36N2O7S    | 26694-69-9  | Xanthylum, 9-[2-(ethoxycarbonyl)phenyl]-3,6-bis(ethylamino)-2,7-dimethyl-, ethyl sulfate (1:1)                         |
| 568,282489  | C36H40O6       |             | BADGE.BPA                                                                                                              |

|             |                 |                       |                                                                                                                                                                   |
|-------------|-----------------|-----------------------|-------------------------------------------------------------------------------------------------------------------------------------------------------------------|
| 568,282489  | C36H40O6        |                       | Cyclo-di-BADGE                                                                                                                                                    |
| 568,3036184 | C33H44O8        |                       | BADGE.BuOEtOH.hydroxyPh                                                                                                                                           |
| 568,3723667 | C30H52N2O8      |                       | Tinuvin 622 n=2                                                                                                                                                   |
| 569,227051  | C24H45CeO6      | 24593-34-8            | 2-Ethylhexanoic acid, cerium salt                                                                                                                                 |
| 570,413147  | C32H58O8        | 144-15-0              | tris(2-ethylhexyl) 2-(acetyloxy)propane-1,2,3-tricarboxylate                                                                                                      |
| 570,468201  | C34H66O4S       | 16545-54-3            | Thiodipropionic acid, ditetradecyl ester                                                                                                                          |
| 570,485962  | C34H66O6        | 26322-14-5            | Dihexadecyl peroxodicarbonate                                                                                                                                     |
| 570,523193  | C36H74S2        | 2500-88-1             | Diocadecyl disulphide                                                                                                                                             |
| 573,020874  | C9H28N3O15P5    | 15827-60-8            | Diethylenetriaminepenta(methylenephosphonic acid)                                                                                                                 |
| 574,3599515 | C44H46          |                       | butadiene n=21                                                                                                                                                    |
| 575,0793926 | C32H16N8Cu      |                       | Copper phthalocyanine blue                                                                                                                                        |
| 576,3662186 | C33H52O8        |                       | BADGE 2BuEtOH                                                                                                                                                     |
| 578,190186  | C24H42O8Sn      | 15571-60-5            | Di-n-octyltin dimaleate                                                                                                                                           |
| 578,199951  | C28H34O13       | 29570-58-9            | Acrylic acid, hexaester with dipentaerythritol                                                                                                                    |
| 580,270996  | C26H54Br2N4     | 61269-61-2            | N,N'-Bis(2,2,6,6-tetramethyl-4-piperidyl)hexamethylenediamine-1,2-dibromoethane, copolymer                                                                        |
| 580,2892557 | C31H48O6S2      |                       | Mesamoll di SO3 C19                                                                                                                                               |
| 582,185974  | C24H46O4S2Sn    | 69226-46-6            | Di-n-octyltin 1,4-butanediol bis-mercaptoacetate                                                                                                                  |
| 584,1444    | C18H25O6F13     |                       | Fluoroalkoxylate(6;6)                                                                                                                                             |
| 584,372253  | C30H57NaO7S     | 2673-22-5             | Sulphosuccinic acid, ditridecyl ester, sodium salt                                                                                                                |
| 584,4288439 | C33H60O8        |                       | Polyadipate (literature)                                                                                                                                          |
| 585,5979    | C38H80ClN       | 107-64-2              | Dimethyldioctadecylammonium chloride                                                                                                                              |
| 586,2930537 | C36H42O7        |                       | BADGE H <sub>2</sub> O BPA                                                                                                                                        |
| 586,3505686 | C34H50O8        |                       | Irganox 245                                                                                                                                                       |
| 586,350586  | C34H50O8        | 36443-68-2            | Triethyleneglycol bis[3-(3-tert-butyl-4-hydroxy -5-methylphenyl) propionate]                                                                                      |
| 588,389526  | C33H56N4OS2     | 991-84-4              | 2,4-Bis(octylmercpto)-6-(4-hydroxy-3,5-di-tert-butylanilino)-1,3,5-triazine                                                                                       |
| 588,438965  | C36H60O6        | 53894-23-8            | tris(7-methyloctyl) benzene-1,2,4-tricarboxylate                                                                                                                  |
| 588,559021  | C38H72N2O2      | 110-31-6              | N,N'-Ethylenebisoleamide                                                                                                                                          |
| 589,61615   | C40H79NO        | 10094-45-8            | Octadecylrucamide                                                                                                                                                 |
| 589,9951279 | C12H9O4PF18     |                       | 4:2 diPAP                                                                                                                                                         |
| 592,035034  | C21H17ClN8O7S2  | 6539-67-9             | Reactive Yellow 3                                                                                                                                                 |
| 592,5906797 | C38H76N2O2      |                       | Bis(stearoyl)ethylenediamide                                                                                                                                      |
| 592,590698  | C38H76N2O2      | 110-30-5              | N,N'-Ethylenebisstearamide                                                                                                                                        |
| 593,574707  | C38H75NO3       | 14351-40-7            | Stearic acid, 2-stearamidoethyl ester                                                                                                                             |
| 594,3049057 | C32H50O6S2      |                       | Mesamoll di SO3 C20                                                                                                                                               |
| 594,3192685 | C35H46O8        |                       | BADGE.H2O.diisoPrPh                                                                                                                                               |
| 594,440002  | C37H58N2O4      | 69851-61-2            | Benzenepropanamide,N,N'-1,3-propanediylbis[3,5-bis(1,1-dimethylethyl)-4-hydroxy-PFDS                                                                              |
| 599,9311    | C10H03F21S      |                       | butadiene n=22                                                                                                                                                    |
| 600,3756015 | C46H48          |                       | Chimassorb 944 part b                                                                                                                                             |
| 600,5566942 | C35H68N8        |                       | Triton X-45 n=9                                                                                                                                                   |
| 602,4029981 | C32H58O10       |                       | 1,2-Didecyl 4-octyl benzene-1,2,4-tricarboxylate                                                                                                                  |
| 602,454651  | C37H62O6        | 84864-66-4            | 1,4-didecyl 2-octyl benzene-1,2,4-tricarboxylate                                                                                                                  |
| 602,454651  | C37H62O6        | 67989-23-5            | Bis(2,4-di-tert-butylphenyl)pentaerythritol diphosphite                                                                                                           |
| 604,308289  | C33H50O6P2      | 26741-53-7            | Polyethyleneglycol sorbitan monolaurate                                                                                                                           |
| 604,41864   | C32H60O10       | 9005-64-5             | Polyethyleneglycol sorbitan monooleate                                                                                                                            |
| 604,41864   | C32H60O10       | 9005-65-6             | 1,2-Propyleneglycol dioleate                                                                                                                                      |
| 604,543091  | C39H72O4        | 105-62-4              | Basic Blue 81                                                                                                                                                     |
| 605,317017  | C39H44ClN3O     | 73309-46-3            | Mesamoll di SO3 C21                                                                                                                                               |
| 608,3205558 | C33H52O6S2      |                       | BADGE BuEtOH t BuPh                                                                                                                                               |
| 608,371304  | C37H52O7        |                       | 1,2-Propyleneglycol distearate                                                                                                                                    |
| 608,574341  | C39H76O4        | 6182-11-2             | Mesamoll tri SO3 C10                                                                                                                                              |
| 610,1365198 | C28H34O9S3      |                       | Fluoroacrylate (10 CF entities)                                                                                                                                   |
| 613,0283    | C16H9O2F20      |                       | 1,3,5-Tris(4-benzoylphenyl) benzene                                                                                                                               |
| 618,717896  | C45H30O3        | 227099-60-7           | Glycerol dioleate                                                                                                                                                 |
| 620,537964  | C39H72O5        | 25637-84-7            | Ethane, 1,1,2,2-tetrakis[p-(2,3-epoxypropoxy)phenyl]-                                                                                                             |
| 622,256653  | C38H38O8        | 7328-97-4             | Brilliant yellow                                                                                                                                                  |
| 624,036011  | C26H18N4Na2O8S2 | 3051-11-4             | Mesamoll tri SO3 C11                                                                                                                                              |
| 624,1521699 | C29H36O9S3      |                       | BADGE (n=1) (di-BADGE)                                                                                                                                            |
| 624,3087038 | C39H44O7        |                       | Glycerol distearate                                                                                                                                               |
| 624,569275  | C39H76O5        | 1323-83-7             | glycerol distearate                                                                                                                                               |
| 624,5692756 | C39H76O5        |                       | styrene n=6                                                                                                                                                       |
| 625,3834266 | C48H49          |                       | butadiene n=23                                                                                                                                                    |
| 626,3912516 | C48H50          |                       | Fluoroalkoxylate(6;7)                                                                                                                                             |
| 628,1706    | C20H29O7F13     |                       | 10:2 monoPAP                                                                                                                                                      |
| 629,9512124 | C11H4O4PF21     |                       | Pigment Black 32                                                                                                                                                  |
| 630,179077  | C40H26N2O6      | 83524-75-8            | 1,2,4-Benzenetricarboxylic acid, tris(decyl) ester                                                                                                                |
| 630,485962  | C39H66O6        | 4130-35-2             | Di-n-octyltin-bis(ethylmaleate)                                                                                                                                   |
| 632,2371185 | C28H48O8Sn      |                       | Bis(2,6-di-tert-butyl-4-methylphenyl)pentaerythritol diphosphite                                                                                                  |
| 632,339539  | C35H54O6P2      | 80693-00-1            | Dibutyltin dilaurate                                                                                                                                              |
| 632,38269   | C32H64O4Sn      | 77-58-7               | 1,6-Hexamethylene-bis(3-(3,5-di-tert-butyl-4-hydroxyphenyl)propionamide)                                                                                          |
| 636,486633  | C40H64N2O4      | 23128-74-7            | 2-Methyl-4-{[4-{4-[(3-methylphenyl)amino]phenyl}{4-[(3-methylphenyl)imino]-2,5-cyclohexadien-1-ylidene)methyl}phenyl]amino}benzenesulfonic acid (Pigment Blue 56) |
| 637,23999   | C40H35N3O3S     | 6417-46-5             | Yellow 110                                                                                                                                                        |
| 637,7999222 | C22H6N4O2Cl8    |                       | Mesamoll tri SO3 C12                                                                                                                                              |
| 638,1678199 | C30H38O9S3      |                       | 1,6-Hexamethylene-bis(3-(3,5-di-tert-butyl-4-hydroxyphenyl)propionate)                                                                                            |
| 638,454651  | C40H62O6        | 35074-77-2            | Glycerol trilaurate                                                                                                                                               |
| 638,548523  | C39H74O6        | 538-24-9              | Fluoroalkoxylate(8;5)                                                                                                                                             |
| 640,1118    | C18H21O5F17     |                       | BADGE 2tBuPh                                                                                                                                                      |
| 640,3763894 | C41H52O6        |                       | Thiodiethanol bis(3-(3,5-di-tert-butyl-4-hydroxy phenyl) propionate)                                                                                              |
| 642,395386  | C38H58O6S       | 41484-35-9            | 10:2 monoPAP                                                                                                                                                      |
| 643,9668624 | C12H6O4PF21     |                       | Triton X-45 n=10                                                                                                                                                  |
| 646,4292128 | C34H62O11       |                       | Phosphorous acid, tris(2,4-di-tert-butylphenyl) ester                                                                                                             |
| 646,451477  | C42H63O3P       | 31570-04-4            | Irgafos 168                                                                                                                                                       |
| 646,4514824 | C42H63O3P       |                       | Mesamoll tri SO3 C13                                                                                                                                              |
| 652,18347   | C31H40O9S3      |                       | butadiene n=24                                                                                                                                                    |
| 652,4069017 | C50H52          |                       | 1,3-Benzenediol, 2,4-bis[(4-dodecylphenyl)azo]-                                                                                                                   |
| 654,487305  | C42H62N4O2      | 65087-00-5            | Irgafos P-EPQ hydrolysis product                                                                                                                                  |
| 658,3340832 | C40H52O4P2      |                       | 2,2'-Methylenebis[6-(2H-benzotriazol-2-yl)-4-(1,1,3,3-tetramethylbutyl)phenol]                                                                                    |
| 658,399536  | C41H50N6O2      | 103597-45-1           | Di-BADGE HCl                                                                                                                                                      |
| 660,2853815 | C39H45O7Cl      |                       | n-octyltin-tris(ethylmaleate)                                                                                                                                     |
| 662,1385267 | C26H38O12Sn     |                       | oxidized Irgafos 168                                                                                                                                              |
| 662,446397  | C42H63O4P       |                       | Fluoroacrylate (11 CF entities)                                                                                                                                   |
| 663,0251    | C17H9O2F22      |                       | Pentaerythritol dioleate                                                                                                                                          |
| 664,564209  | C41H76O6        | 25151-96-6            | 1,3-Bis(3-octadecylureido)propane                                                                                                                                 |
| 664,658997  | C41H84N4O2      | 35674-65-8            | Natamycin                                                                                                                                                         |
| 665,304993  | C33H47N013      | 7681-93-8             | Mesamoll tri SO3 C14                                                                                                                                              |
| 666,19912   | C32H42O9S3      |                       | (3E,3'''E)-3,3'-[1,1-Cyclohexanediylbis[(2-methyl-4,1-phenylene)(1E)-2-hydrazinyl-1-ylidene]]bis[1,1'-bi(cyclohexane)-1,5-dien-4-one] (Solvent Yellow 29)         |
| 668,408997  | C44H52N4O2      | 6706-82-7             | Fluoroalkoxylate(6;8)                                                                                                                                             |
| 672,1968    | C22H33O8F13     |                       |                                                                                                                                                                   |
| 672,583862  | C39H80N2O4S     | 72749-55-4            | Imidazolium compounds, 2-(C17- and C17-unsaturated alkyl)-1-[2-(C18- and C18- unsaturated amido)ethyl]-4,5-dihydro-1-methyl-, methylsulfates                      |
| 674,2252293 | C28H55O4S2SnCl  |                       | n-octyltin-bis(ethylhexylthioglycolate) chloride                                                                                                                  |
| 677,499573  | C36H72N08P      | 8002-43-5             | Lecithin                                                                                                                                                          |
| 678,200745  | C28H38O19       | 126-14-7              | Sucrose octaacetate                                                                                                                                               |
| 678,4225517 | C52H54          |                       | butadiene n=25                                                                                                                                                    |
| 680,2147701 | C33H44O9S3      |                       | Mesamoll tri SO3 C15                                                                                                                                              |
| 684,138     | C20H25O6F17     |                       | Fluoroalkoxylate(8;6)                                                                                                                                             |
| 684,3662186 | C42H52O8        |                       | BADGE (n=1) PrOH                                                                                                                                                  |
| 684,414978  | C36H68O4Sn      | 1912-84-1             | Oleic acid, tin(II) salt                                                                                                                                          |
| 686,3818687 | C42H54O8        |                       | BADGE.BPA.BuEtOH                                                                                                                                                  |
| 688,445984  | C36H72O4Sn      | 6994-59-8             | Tin distearate                                                                                                                                                    |
| 688,498413  | C45H69O3P       | 26523-78-4 and 1333-2 | Tris(mono and dinonylphenyl) phosphite                                                                                                                            |
| 688,4984326 | C45H69O3P       |                       | TNPP                                                                                                                                                              |
| 689,572327  | C39H80NO6P      | 63438-80-2            | (2-Carbobutoxyethyl)tin-tris(isooctyl mercaptoacetate)                                                                                                            |
| 689,9887407 | C14H9O4PF22     |                       | 4:2/6:2 diPAP                                                                                                                                                     |
| 692,559021  | C42H76O7        | 29116-98-1            | Sorbitan dioleate                                                                                                                                                 |
| 694,2304202 | C34H46O9S3      |                       | Mesamoll tri SO3 C16                                                                                                                                              |

|             |                     |             |                                                                                                                                                                      |
|-------------|---------------------|-------------|----------------------------------------------------------------------------------------------------------------------------------------------------------------------|
| 694,307617  | C34H56CaO8P2        | 65140-91-2  | 3,5-Di-tert-butyl-4-hydroxybenzylphosphonic acid, monoethyl ester, calcium salt                                                                                      |
| 694,969116  | C26H16N3Na3O10S3    | 3861-73-2   | Solvent Blue 37                                                                                                                                                      |
| 696,2620593 | C39H46O7Cl2         |             | Di-BADGE 2HCl                                                                                                                                                        |
| 696,590393  | C42H80O7            | 29589-99-9  | Distearyl citrate                                                                                                                                                    |
| 698,3818687 | C43H54O8            |             | BADGE (n=1) BuOH                                                                                                                                                     |
| 699,424744  | C42H57N3O6          | 40601-76-1  | 1,3,5-Tris(4-tert-butyl-3-hydroxy-2,6-dimethylbenzyl)-1,3,5-triazine-2,4,6(1H,3H,5H)-trione                                                                          |
| 700,3611333 | C42H52O9            |             | BADGE (n=1) MeEtOH                                                                                                                                                   |
| 701,608887  | C42H84ClNO4         | 67846-68-8  | Di(hydrogenated tallow fatty acids-2-hydroxyethyl ester)dimethyl ammonium chloride                                                                                   |
| 702,3767833 | C42H54O9            |             | BADGE (n=1) H <sub>2</sub> O PrOH                                                                                                                                    |
| 704,4382018 | C54H56              |             | butadiene n=26                                                                                                                                                       |
| 704,4933472 | C45H69O4P           |             | tris(nonylphenyl)phosphate                                                                                                                                           |
| 706,471069  | C35H69Cl3N8         | 71878-19-8  | Poly[6-[(1,1,3,3-tetramethylbutyl)amino] -1,3,5-triazine-2,4-diyl]-[(2,2,6,6-tetramethyl-4-piperidyl)-imino]hexamethylene[(2,2,6,6-tetramethyl-4-piperidyl)imino]    |
| 708,2460702 | C35H18O9S3          |             | Mesamoll tri SO3 C17                                                                                                                                                 |
| 713,0219    | C18H9O2F24          |             | Fluoroacrylate (12 CF entities)                                                                                                                                      |
| 714,3767833 | C43H54O9            |             | BADGE (n=1) EtEtOH                                                                                                                                                   |
| 714,558716  | C48H74O4            | 36388-36-0  | 1,2-Benzenedicarboxylic acid, 1,2-bis[[tetradecahydro-1,4a-dimethyl-7-(1-methylethyl)-1-phenanthrenyl]methyl] ester                                                  |
| 716,223     | C24H37O9F13         |             | Fluoroalkoxylate(6;9)                                                                                                                                                |
| 716,3924334 | C43H56O9            |             | BADGE (n=1) H <sub>2</sub> O BuOH                                                                                                                                    |
| 718,3505686 | C45H50O8            |             | BADGE (n=1) Ph                                                                                                                                                       |
| 718,371698  | C42H54O10           |             | BADGE (n=1) H <sub>2</sub> O MeEtOH                                                                                                                                  |
| 722,2617203 | C36H50O9S3          |             | Mesamoll tri SO3 C18                                                                                                                                                 |
| 728,1642    | C22H29O7F17         |             | Fluoroalkoxylate(8;7)                                                                                                                                                |
| 729,4460268 | C56H57              |             | styrene n=7                                                                                                                                                          |
| 730,4538519 | C56H58              |             | butadiene n=27                                                                                                                                                       |
| 732,387348  | C43H56O10           |             | BADGE (n=1) H <sub>2</sub> O EtEtOH                                                                                                                                  |
| 736,2773704 | C37H52O9S3          |             | Mesamoll tri SO3 C19                                                                                                                                                 |
| 736,3611333 | C45H52O9            |             | BADGE (n=1) H <sub>2</sub> O Ph                                                                                                                                      |
| 742,4080835 | C45H58O9            |             | BADGE (n=1) BuEtOH                                                                                                                                                   |
| 744,257385  | C31H60O6S3Sn        | 57583-34-3  | Monomethyltin tris(ethylhexyl mercaptoacetate)                                                                                                                       |
| 744,257385  | C31H60O6S3Sn        | 54849-38-6  | Monomethyltin tris(isooctyl mercaptoacetate)                                                                                                                         |
| 744,4237335 | C45H60O9            |             | BADGE (n=1) 2PrOH                                                                                                                                                    |
| 744,507996  | C40H80O4Sn          | 3648-18-8   | Di-n-octyltin dilaurate                                                                                                                                              |
| 750,202026  | C48H26N6O4          | 3049-71-6   | Pigment Red 178                                                                                                                                                      |
| 750,2930204 | C38H54O9S3          |             | Mesamoll tri SO3 C20                                                                                                                                                 |
| 752,3894022 | C36H72O4S2Sn        |             | Di-n-octyltin-bis(ethylhexylthioglycolate)                                                                                                                           |
| 752,389404  | C36H72O4S2Sn        | 26401-97-8  | Di-n-octyltin bis(isooctyl mercaptoacetate)                                                                                                                          |
| 752,389404  | C36H72O4S2Sn        | 15571-58-1  | Di-n-octyltin bis(2-ethylhexyl mercaptoacetate)                                                                                                                      |
| 756,4695019 | C58H60              |             | butadiene n=28                                                                                                                                                       |
| 759,4445233 | C42H59N6O7          |             | Nylon MXD6 n=3                                                                                                                                                       |
| 760,1316    | C20H25O6F21         |             | Fluoroalkoxylate(10;5)                                                                                                                                               |
| 760,2492    | C26H41O10F13        |             | Fluoroalkoxylate(6;10)                                                                                                                                               |
| 760,4186481 | C45H60O10           |             | BADGE (n=1) H <sub>2</sub> O BuEtOH                                                                                                                                  |
| 764,18103   | C37H38N2Na2O9S2     | 72243-90-4  | Acid Violet 48                                                                                                                                                       |
| 764,3086705 | C39H56O9S3          |             | Mesamoll tri SO3 C21                                                                                                                                                 |
| 770,168945  | C34H30N10O8S2       | 7342-13-4   | 4,4'-bis[[4-Methoxy-6-anilino-s-triazine-2-yl]amino]-2,2'-stilbenedisulphonic acid                                                                                   |
| 770,168945  | C34H30N10O8S2       | 3426-43-5   | 4,4'-Bis[[4-anilino-6-methoxy-s-triazin-2-yl]amino]-2,2'-stilbenedisulphonic acid, disodium salt                                                                     |
| 770,5180529 | C42H74O12           |             | Polyadipate (literature)                                                                                                                                             |
| 772,1904    | C24H33O8F17         |             | Fluoroalkoxylate(8;8)                                                                                                                                                |
| 772,4550337 | C47H64O9            |             | BADGE (n=1) 2BuOH                                                                                                                                                    |
| 774,4131688 | C49H58O8            |             | BADGE (n=1) tBuPh                                                                                                                                                    |
| 774,595093  | C54H78O3            | 1709-70-2   | 1,3,5-Trimethyl-2,4,6-tris(3,5-di-tert-butyl-4-hydroxybenzyl)benzene                                                                                                 |
| 776,4135628 | C45H60O11           |             | BADGE (n=1) 2MeEtOH                                                                                                                                                  |
| 778,1246345 | C35H38O12S4         |             | Mesamoll tetra SO3 C10                                                                                                                                               |
| 782,485152  | C60H62              |             | butadiene n=29                                                                                                                                                       |
| 783,518616  | C48H69N3O6          | 27676-62-6  | 1,3,5-Tris(3,5-di-tert-butyl-4-hydroxybenzyl)-1,3,5-triazine-2,4,6(1H,3H,5H)-trione                                                                                  |
| 784,306458  | C34H64O8S2Sn        | 63397-60-4  | Bis(2-carbobutoxyethyl)tin-bis(isooctyl mercaptoacetate)                                                                                                             |
| 789,9823535 | C16H9O4PF26         |             | 6:2 diPAP                                                                                                                                                            |
| 792,1402845 | C36H40O12S4         |             | Mesamoll tetra SO3 C11                                                                                                                                               |
| 792,4237335 | C49H60O9            |             | BADGE (n=1) H <sub>2</sub> O 2tBuPh                                                                                                                                  |
| 794,475769  | C50H66O8            | 32509-66-3  | Ethyleneglycol bis[3,3-bis(3-tert-butyl-4-hydroxyphenyl)butyrate]                                                                                                    |
| 796,3975188 | C51H56O8            |             | BADGE.2BPA                                                                                                                                                           |
| 800,407715  | C54H56O6            | 68937-90-6  | Acids, fatty (C18 unsaturated), trimers                                                                                                                              |
| 800,424988  | C40H72O8Sn          | 10039-33-5  | Di-n-octyltin bis(2-ethylhexyl maleate)                                                                                                                              |
| 802,440552  | C40H74O8Sn          | 1185-73-5   | Di-n-octyltin bis(ethyl maleate)                                                                                                                                     |
| 802,440552  | C40H74O8Sn          | 33568-99-9  | Di-n-octyltin bis(isooctyl maleate)                                                                                                                                  |
| 804,1578    | C22H29O7F21         |             | Fluoroalkoxylate(10;6)                                                                                                                                               |
| 804,2754    | C28H45O11F13        |             | Fluoroalkoxylate(6;11)                                                                                                                                               |
| 804,4448629 | C47H64O11           |             | BADGE (n=1) 2EtEtOH                                                                                                                                                  |
| 804,712463  | C51H97O4P           | 3135-18-0   | 3,5-Di-tert-butyl-4-hydroxybenzylphosphonic acid, dioctadecyl ester                                                                                                  |
| 806,1559346 | C37H42O12S4         |             | Mesamoll tetra SO3 C12                                                                                                                                               |
| 806,451111  | C36H70O19           | 9004-64-2   | Hydroxypropyl cellulose                                                                                                                                              |
| 808,5008021 | C62H64              |             | butadiene n=30                                                                                                                                                       |
| 810,485962  | C54H66O6            | 57569-40-1  | Terephthalic acid, diester with 2,2'-methylenebis(4-methyl-6-tert-butylphenol)                                                                                       |
| 812,3924334 | C51H56O9            |             | BADGE (n=1) 2Ph                                                                                                                                                      |
| 815,4159085 | C51H59O9            |             | 5-ring-BADGE                                                                                                                                                         |
| 816,4812484 | C49H68O10           |             | BADGE (n=1).BuEtOH.BuOH                                                                                                                                              |
| 820,028015  | C31H23N6Na3O11S3    | 67969-87-3  | Trisodium 7-[(E)-{4-[[{(2-methoxy-4-[(E)-(3-sulfonatophenyl)diazenyl]phenyl}carbamoyl)amino]-2-methylphenyl]diazenyl]-1,3-naphthalenedisulfonate (Direct Yellow 118) |
| 820,1715847 | C38H44O12S4         |             | Mesamoll tetra SO3 C13                                                                                                                                               |
| 822,504395  | C48H66N6O6          | 88122-99-0  | Tris(2-ethylhexyl)-4,4',4''-(1,3,5-triazine-2,4,6-triyltriimino)tribenzoate                                                                                          |
| 833,5086271 | C64H65              |             | styrene n=8                                                                                                                                                          |
| 834,1872347 | C39H46O12S4         |             | Mesamoll tetra SO3 C14                                                                                                                                               |
| 834,5164521 | C64H66              |             | butadiene n=31                                                                                                                                                       |
| 836,2428    | C26H41O10F17        |             | Fluoroalkoxylate(8;9)                                                                                                                                                |
| 842,366943  | C38H74O6S3Sn        | 27107-89-7  | Mono-n-octyltin tris(2-ethylhexyl mercaptoacetate)                                                                                                                   |
| 842,366943  | C38H74O6S3Sn        | 26401-86-5  | Mono-n-octyltin tris(isooctyl mercaptoacetate)                                                                                                                       |
| 842,3669522 | C38H74O6S3Sn        |             | n-octyltin-tris(ethylhexylthioglycolate)                                                                                                                             |
| 846,38855   | C40H62O19           | 126-13-6    | Sucrose acetate isobutyrate                                                                                                                                          |
| 846,4905838 | C54H72O4P2          |             | Irgafos P-EPQ hydrolysis product                                                                                                                                     |
| 848,184     | C24H33O8F21         |             | Fluoroalkoxylate(10;7)                                                                                                                                               |
| 848,2028848 | C40H48O12S4         |             | Mesamoll tetra SO3 C15                                                                                                                                               |
| 848,3016    | C30H49O12F13        |             | Fluoroalkoxylate(6;12)                                                                                                                                               |
| 851,3925862 | C51H60O9Cl          |             | 5-ring-BADGE HCl                                                                                                                                                     |
| 851,550725  | C45H77N3O12         |             | Tinuvin 622 n=3                                                                                                                                                      |
| 852,37085   | C53H58O6P2          | 154862-43-8 | Bis(2,4-dicumylphenyl)pentaerythritol-diphosphite                                                                                                                    |
| 852,4237335 | C54H60O9            |             | BADGE(n=1).BPA                                                                                                                                                       |
| 860,5074632 | C51H72O11           |             | BADGE (n=1) 2BuEtOH                                                                                                                                                  |
| 860,5321022 | C66H68              |             | butadiene n=32                                                                                                                                                       |
| 862,2185349 | C41H50O12S4         |             | Mesamoll tetra SO3 C16                                                                                                                                               |
| 864,514587  | C44H88O4S2Sn        | 84030-61-5  | Di-n-dodecyltin bis(isooctyl mercaptoacetate)                                                                                                                        |
| 872,2967852 | C41H60O12S4         |             | Mesamoll tetra SO3 C21                                                                                                                                               |
| 876,2341849 | C42H22O12S4         |             | Mesamoll tetra SO3 C17                                                                                                                                               |
| 878,757446  | C54H102O8           | 54140-20-4  | Sorbitan tripalmitate                                                                                                                                                |
| 879,929993  | C23H47Cl5Na2O2S2Sn2 | 68442-12-6  | Reaction products of oleic acid, 2-mercaptoethyl ester, with dichlorodimethyltin, sodium sulphide and trichloromethyltin                                             |
| 880,1514    | C22H29O7F25         |             | Fluoroalkoxylate(12;5)                                                                                                                                               |
| 880,269     | C28H45O11F17        |             | Fluoroalkoxylate(8;10)                                                                                                                                               |
| 884,78302   | C57H104O6           | 122-32-7    | Glycerol trioleate                                                                                                                                                   |
| 886,5477522 | C68H70              |             | butadiene n=33                                                                                                                                                       |
| 887,369264  | C51H61O9Cl2         |             | 5-ring-BADGE 2HCl                                                                                                                                                    |
| 889,9759663 | C18H9O4PF30         |             | 6:2/8:2 diPAP                                                                                                                                                        |
| 890,249835  | C43H54O12S4         |             | Mesamoll tetra SO3 C18                                                                                                                                               |
| 890,8302413 | C57H110O6           |             | glycerol tristearate                                                                                                                                                 |
| 892,3279    | C32H53O13F13        |             | Fluoroalkoxylate(6;13)                                                                                                                                               |
| 894,574524  | C48H86CaO12         | 5793-94-2   | Stearoyl-2-lactylic acid, calcium salt                                                                                                                               |
| 898,429565  | C42H82O6S3Sn        | 67649-65-4  | Mono-n-dodecyltin tris(isooctyl mercaptoacetate)                                                                                                                     |

|             |                      |             |                                                                                                                                                   |
|-------------|----------------------|-------------|---------------------------------------------------------------------------------------------------------------------------------------------------|
| 904,2654851 | C44H56O12S4          |             | Mesamoll tetra SO3 C19                                                                                                                            |
| 908,4499483 | C57H64O10            |             | BADGE (n=2) (tri-BADGE)                                                                                                                           |
| 912,2364    | C26H41O10F21         |             | Fluoroalkoxylate(10;8)                                                                                                                            |
| 912,5634023 | C70H72               |             | butadiene n=34                                                                                                                                    |
| 916,274475  | C40H44N12O10S2       | 4404-43-7   | 4,4'-Bis[[4-anilino-6-[bis(2-hydroxyethyl)amino]-s-triazin-2-yl]amino]-2,2'-stilbene-                                                             |
| 918,2811351 | C45H58O12S4          |             | disulphonic acid                                                                                                                                  |
| 918,7160244 | C55H98O10            |             | Mesamoll tetra SO3 C20                                                                                                                            |
| 918,7887954 | C57H106O8            |             | Epoxidised linseed oil                                                                                                                            |
| 924,1776    | C24H33O8F25          |             | Epoxidised soy bean oil                                                                                                                           |
| 924,21698   | C40H38N12Na2O8S2     | 16090-02-1  | Fluoroalkoxylate(12;6)                                                                                                                            |
| 924,2953    | C30H49O12F17         |             | 4,4'-Bis[[4-anilino-6-morpholino-s-triazin-2-yl]amino]-2,2'-stilbenedisulphonic acid,                                                             |
| 924,5176339 | C59H72O9             |             | disodium salt                                                                                                                                     |
| 925,4526879 | C57H65O11            |             | Fluoroalkoxylate(8;11)                                                                                                                            |
| 936,3541    | C34H57O14F13         |             | BADGE (n=1) 2tBuPh                                                                                                                                |
| 937,5712273 | C72H73               |             | Tri-BADGE H <sub>2</sub> O                                                                                                                        |
| 938,5790524 | C72H74               |             | Fluoroalkoxylate(6;14)                                                                                                                            |
| 938,815002  | C57H110O9            | 139-44-6    | styrene n=9                                                                                                                                       |
| 941,207825  | C32H44N11NaO15S3     | 85154-06-9  | butadiene n=35                                                                                                                                    |
| 943,418801  | C57H64O10Cl          |             | Glycerol tris(12-hydroxystearate)                                                                                                                 |
| 946,7473245 | C57H102O10           |             | 4-[[4-[Bis(2-hydroxyethyl)amino]-6-methoxy-s-triazin-2-yl]amino]-4'-[[4-methoxy-                                                                  |
| 946,7473245 | C57H102O10           |             | 6-[[2-sulphoethyl]amino]-s-triazin-2-yl]amino]-2,2'-stilbenedisulphonic acid, sodium                                                              |
| 948,872131  | C60H116O7            | 7775-50-0   | salt, compound with diethanolamine                                                                                                                |
| 949,178223  | C12Br10O             | 1163-19-5   | Tri-BADGE HCl                                                                                                                                     |
| 955,987     | C35H24N6Na4O13S4     | 3214-47-9   | Epoxidised soy bean oil                                                                                                                           |
| 956,2627    | C28H45O11F21         |             | Epoxidised linseed oil                                                                                                                            |
| 956,804443  | C60H108O8            | 26266-58-0  | Trioctadecyl 2-hydroxypropane-1,2,3-tricarboxylate                                                                                                |
| 960,237976  | C40H42N12Na2O10S2    | 4193-55-9   | Ether, bis(pentabromophenyl)                                                                                                                      |
| 960,7265891 | C57H100O11           |             | Tetrasodium 3,3'-(carbonylbis[imino(2-methyl-4,1-phenylene)-2,1-diazenediyl])di(1,5-naphthalenedisulfonate) (Direct Yellow 50)                    |
| 960,7265891 | C57H100O11           |             | Fluoroalkoxylate(10;9)                                                                                                                            |
| 961,215027  | C14H4Br10            | 84852-53-9  | Sorbitan trioleate                                                                                                                                |
| 964,5947024 | C74H76               |             | 4,4'-Bis[[4-anilino-6-[bis(2-hydroxyethyl)amino]-s-triazin-2-yl]amino]-2,2'-stilbene-                                                             |
| 968,3215    | C32H53O13F17         |             | disulphonic acid, disodium salt                                                                                                                   |
| 968,5074632 | C60H72O11            |             | Epoxidised soy bean oil                                                                                                                           |
| 970,5231132 | C60H74O11            |             | Epoxidised linseed oil                                                                                                                            |
| 972,316956  | C36H60O30            | 10016-20-3  | 1,2-Bis(2,3,4,5,6-pentabromophenyl)ethane                                                                                                         |
| 974,7058536 | C57H98O12            |             | butadiene n=36                                                                                                                                    |
| 974,7058536 | C57H98O12            |             | Fluoroalkoxylate(8;12)                                                                                                                            |
| 976,21228   | C40H42KN12NaO10S2    | 70942-01-7  | BADGE(n=2).PrOH                                                                                                                                   |
| 979,3954787 | C57H65O10Cl2         |             | BADGE(n=1).BPA.BuEtOH                                                                                                                             |
| 980,3803    | C36H61O15F13         |             | α-Dextrin                                                                                                                                         |
| 980,862     | C60H116O9            | 26658-19-5  | Epoxidised soy bean oil                                                                                                                           |
| 988,135986  | C36H36N12O14S4       | 47910-88-3  | Epoxidised linseed oil                                                                                                                            |
| 988,2301    | C26H41O10F25         |             | 4,4'-Bis[[4-[bis(2-Hydroxyethyl)amino]-6-(m-sulphoanilino)-s-triazine-2-yl]amino]-2,2'-stilbenedisulphonic acid                                   |
| 988,6851182 | C57H96O13            |             | Fluoroalkoxylate(12;7)                                                                                                                            |
| 989,696533  | C54H105CeO6          | 10119-53-6  | Epoxidised soy bean oil                                                                                                                           |
| 989,9695791 | C20H9O4PF34          |             | Stearic acid, cerium salt                                                                                                                         |
| 990,6103525 | C76H78               |             | 8:2 diPAP                                                                                                                                         |
| 992,185974  | C40H42K2N12O10S2     | 71230-67-6  | butadiene n=37                                                                                                                                    |
| 992,9445918 | C59H116N12           |             | Dipotassium 4,4'-bis[6-anilino-4-[bis(2-hydroxyethyl)amino]-1,3,5-triazin-2-yl]amino]stilbene-2,2'-disulphonate                                   |
| 1000,2889   | C30H49O12F21         |             | Chimassorb 944 n=1                                                                                                                                |
| 1006,589176 | C56H78N8O9           |             | Fluoroalkoxylate(10;10)                                                                                                                           |
| 1012,3477   | C34H57O14F17         |             | Nylon MXD6 n=4                                                                                                                                    |
| 1014,26001  | C42H44N14Na2O10S2    | 27344-06-5  | Fluoroalkoxylate(8;13)                                                                                                                            |
| 1014,548419 | C58H85AlO9P2         | 151841-65-5 | 4,4'-Bis[[4-anilino-6-[(2-carbamoylethyl)-(2-hydroxyethyl)amino]-s-triazin-2-yl]amino]-                                                           |
| 1016,626003 | C78H80               |             | 2,2'-stilbenedisulphonic acid, disodium salt                                                                                                      |
| 1016,643647 | C57H92O15            |             | Aluminium hydroxybis [2,2'-methylenebis (4,6- di-tert.butylphenyl)] phosphate                                                                     |
| 1024,4065   | C38H65O16F13         |             | butadiene n=38                                                                                                                                    |
| 1025,911011 | C32H20Cl2N10Na4O12S4 | 37138-26-4  | Epoxidised linseed oil                                                                                                                            |
| 1032,2563   | C28H45O11F25         |             | Fluoroalkoxylate(6;16)                                                                                                                            |
| 1034,647084 | C68H92O4P2           |             | 4,4'-Bis[[4-chloro-6-(4-sulphoanilino)-s-triazin-2-yl]amino]-2,2'-stilbenedisulphonic                                                             |
| 1034,647095 | C68H92O4P2           | 119345-01-6 | acid, tetrasodium salt                                                                                                                            |
| 1034,647095 | C68H92O4P2           | 38613-77-3  | Fluoroalkoxylate(12;8)                                                                                                                            |
| 1041,633828 | C80H81               |             | Irgafos P-EPQ                                                                                                                                     |
| 1044,3151   | C32H53O13F21         |             | Reaction product of di-tert-butylphosphonite with biphenyl, obtained by condensation of 2,4-di-tert-butylphenol with Friedel Craft reaction       |
| 1050,641999 | C68H92O5P2           |             | product of phosphorus trichloride and biphenyl                                                                                                    |
| 1056,3739   | C36H61O15F17         |             | Tetrakis(2,4-di-tert-butyl-phenyl)-4,4'-biphenylene diphosponite                                                                                  |
| 1059,018066 | C69H134O6            | 18641-57-1  | styrene n=10                                                                                                                                      |
| 1060,347168 | C69H48N4O8           | 178671-58-4 | Fluoroalkoxylate(10;11)                                                                                                                           |
| 1066,046753 | C39H30N10Na4O13S4    | 50925-42-3  | Irgafos P-EPQ oxidation product                                                                                                                   |
| 1066,636914 | C68H92O6P2           |             | Fluoroalkoxylate(8;14)                                                                                                                            |
| 1068,4327   | C40H69O17F13         |             | Glycerol tribehenate                                                                                                                              |
| 1076,18811  | C40H44N12O16S4       | 5131-70-4   | Pentaerythritol tetrakis (2-cyano-3,3-diphenylacrylate)                                                                                           |
| 1076,2825   | C30H49O12F25         |             | Direct Yellow 86                                                                                                                                  |
| 1088,3413   | C34H57O14F21         |             | Irgafos P-EPQ oxidation product                                                                                                                   |
| 1089,963192 | C22H9O4PF38          |             | Fluoroalkoxylate(6;17)                                                                                                                            |
| 1100,4001   | C38H65O16F17         |             | 4,4'-Bis[[4-[bis(2-hydroxyethyl)amino]-6-(m-sulphoanilino)-1,3,5-triazin-2-yl]amino]stilbene-2,2'-disulphonic acid                                |
| 1112,4589   | C42H73O18F13         |             | Fluoroalkoxylate(12;9)                                                                                                                            |
| 1120,3087   | C32H53O13F25         |             | Fluoroalkoxylate(10;12)                                                                                                                           |
| 1132,3675   | C36H61O15F21         |             | 8:2/10:2 diPAP                                                                                                                                    |
| 1134,369751 | C42H70O35            | 7585-39-9   | Fluoroalkoxylate(8;15)                                                                                                                            |
| 1134,729083 | C60H102N4O16         |             | Fluoroalkoxylate(6;18)                                                                                                                            |
| 1144,4263   | C40H69O17F17         |             | Fluoroalkoxylate(12;10)                                                                                                                           |
| 1145,696428 | C88H89               |             | Fluoroalkoxylate(10;13)                                                                                                                           |
| 1156,4851   | C44H77O19F13         |             | β-Dextrin                                                                                                                                         |
| 1161,925505 | C22H5O4PF42          |             | Tinuvin 622 n=4                                                                                                                                   |
| 1164,115967 | C40H40N12Na4O16S4    | 16470-24-9  | Fluoroalkoxylate(8;16)                                                                                                                            |
| 1164,3349   | C34H57O14F25         |             | styrene n=11                                                                                                                                      |
| 1176,3937   | C38H65O16F21         |             | Fluoroalkoxylate(6;19)                                                                                                                            |
| 1176,784058 | C73H108O12           | 6683-19-8   | 10:1 diPAP                                                                                                                                        |
| 1176,784079 | C73H108O12           |             | 4,4'-Bis[[4-[bis(2-hydroxyethyl)amino]-6-(p-sulphoanilino)-s-triazin-2-yl]amino]-2,2'-                                                            |
| 1182,116943 | C42H38N14Na4O14S4    | 37515-76-7  | stilbenedisulphonic acid, tetrasodium salt                                                                                                        |
| 1185,925505 | C24H5O4PF42          |             | Fluoroalkoxylate(12;11)                                                                                                                           |
| 1188,4525   | C42H73O18F17         |             | Fluoroalkoxylate(10;14)                                                                                                                           |
| 1200,5114   | C46H81O20F13         |             | Pentaerytritol tetrakis(3-(3,5-di-tert-butyl-4-hydroxyphenyl)propionate)                                                                          |
| 1201,116943 | C77H148O8            | 115-83-3    | Irganox 1010                                                                                                                                      |
| 1208,3611   | C36H61O15F25         |             | Tetrasodium 4,4'-bis[[4-[(2-cyanoethyl)(2-hydroxyethyl)amino]-6-[(4-sulphonatophenyl)amino]-1,3,5-triazin-2-yl]amino]stilbene-2,2'-disulphonate   |
| 1220,178467 | C44H48N12Na4O16S4    | 67786-25-8  | 10:2 diPAP                                                                                                                                        |
| 1220,4199   | C40H69O17F21         |             | Fluoroalkoxylate(8;17)                                                                                                                            |
| 1221,004272 | C24H22F34N3O8PS2     | 30381-98-7  | Fluoroalkoxylate(6;20)                                                                                                                            |
| 1229,112061 | C78H148O9            | 61752-68-9  | Pentaerythritol tetrastearate                                                                                                                     |
| 1232,4788   | C44H77O19F17         |             | Fluoroalkoxylate(10;12)                                                                                                                           |
| 1239,043823 | C78H144O6P2          | 13003-12-8  | Benzenesulfonic acid *2,2'-(1,2-ethenediyl)bis[5-[[4-[bis(2-hydroxypropyl)amino]-6-[[4-sulfophenyl)amino]-1,3,5-triazin-2-yl]amino]-, tetrasodium |
| 1252,3873   | C38H65O16F25         |             | salt                                                                                                                                              |
| 1253,733829 | C70H97N10O11         |             | Fluoroalkoxylate(10;15)                                                                                                                           |
|             |                      |             | Bis[2-[N-ethyl(perfluorooctane)sulphonamido]ethyl] phosphate, ammonium salt                                                                       |
|             |                      |             | Sorbitan tetrastearate                                                                                                                            |
|             |                      |             | Fluoroalkoxylate(8;18)                                                                                                                            |
|             |                      |             | 4,4'-Butylidene-bis(6-tert-butyl-3-methylphenyl-ditridecyl phosphite)                                                                             |
|             |                      |             | Fluoroalkoxylate(12;13)                                                                                                                           |
|             |                      |             | Nylon MXD6 n=5                                                                                                                                    |



|             |                   |             |                                                                                                                                                                          |
|-------------|-------------------|-------------|--------------------------------------------------------------------------------------------------------------------------------------------------------------------------|
| 1258,251343 | C64H50CaN8O14S2   | 43035-18-3  | Pigment Red 247                                                                                                                                                          |
| 1260,692505 | C56H108O30        | 9004-65-3   | Methylhydroxypropylcellulose                                                                                                                                             |
| 1264,4462   | C42H73O18F21      |             | Fluoroalkoxylate(10;16)                                                                                                                                                  |
| 1276,505    | C46H81O20F17      |             | Fluoroalkoxylate(8;19)                                                                                                                                                   |
| 1296,4136   | C40H69O17F25      |             | Fluoroalkoxylate(12;14)                                                                                                                                                  |
| 1304,013794 | C40H38N12Na6O18S6 | 41098-56-0  | 4,4'-Bis[[4-diethylamino-6-(2,5-disulphoanilino)-s-triazin-2-yl]amino]-2,2'-stilbene-disulphonic acid, hexasodium salt                                                   |
| 1307,960693 | C40H28N12Na8O20S4 | 174305-36-3 | N,N'-Ethylidenebis[(3-sulpho-4,1-phenylene)imino(6-[(4-sulphophenyl)amino]-s-triazin-4,2-diyl)]bis[N-(carboxymethyl)glycine], octasodium salt                            |
| 1308,4724   | C44H77O19F21      |             | Fluoroalkoxylate(10;17)                                                                                                                                                  |
| 1320,5312   | C48H85O21F17      |             | Fluoroalkoxylate(8;20)                                                                                                                                                   |
| 1331,97229  | C40H34N12Na6O20S6 | 52301-70-9  | 4,4'-Bis[[4-morpholino-6-(2,5-disulphoanilino)-s-triazin--2-yl]amino]-2,2'-stilbene-disulphonic acid, hexasodium salt                                                    |
| 1340,4398   | C42H73O18F25      |             | Fluoroalkoxylate(12;15)                                                                                                                                                  |
| 1352,4986   | C46H81O20F21      |             | Fluoroalkoxylate(10;18)                                                                                                                                                  |
| 1367,993042 | C40H38N12Na6O22S6 | 68971-49-3  | 4,4'-Bis[[4-[bis(2-hydroxyethyl)amino]-6-(2,5-disulphoanilino)-s-triazin-2-yl]amino]-2,2'-stilbenedisulphonic acid, hexasodium salt                                      |
| 1384,466    | C44H77O19F25      |             | Fluoroalkoxylate(12;16)                                                                                                                                                  |
| 1396,5248   | C48H85O21F21      |             | Fluoroalkoxylate(10;19)                                                                                                                                                  |
| 1417,907442 | C75H127N5O20      |             | Tinuvin 622 n=5                                                                                                                                                          |
| 1424,5561   | C50H89O21F21      |             | Fluoroalkoxylate(10;20)                                                                                                                                                  |
| 1428,4922   | C46H81O20F25      |             | Fluoroalkoxylate(12;17)                                                                                                                                                  |
| 1463,911499 | C90H132N09P3      | 80410-33-9  | 2,2',2'''-Nitrilo[triethyl tris(3,3',5,5'-tetra-tert-butyl-1,1'-bi-phenyl-2,2'-diyl)phosphite]                                                                           |
| 1472,5184   | C48H85O21F25      |             | Fluoroalkoxylate(10;18)                                                                                                                                                  |
| 1500,878482 | C84H116N12O13     |             | Nylon MXD6 n=6                                                                                                                                                           |
| 1514,056641 | C52H44N14Na6O20S6 | 68134-04-3  | Hexasodium 2,2'-[vinylenebis[(3-sulphonato-4,1-phenylene)imino[6-[[3-amino-3-oxopropyl](phenylmethyl)amino]-1,3,5-triazine-4,2-diyl]imino]]bis(benzene-1,4-disulphonate) |
| 1516,5446   | C50H89O22F25      |             | Fluoroalkoxylate(12;19)                                                                                                                                                  |
| 1576,5658   | C52H93O24F25      |             | Fluoroalkoxylate(12;20)                                                                                                                                                  |
| 1591,485636 | C94H182N20        |             | Chimassorb 944 n=2                                                                                                                                                       |
